# Supplementary material for: ChiPPI: a novel method for mapping chimeric protein–protein interactions uncovers selection principles of protein fusion events in cancer
Source: PubMed Central journal article supplement — Nucleic Acids Res. 2017 May 26;45(12):7094–105. doi: 10.1093/nar/gkx423 (PMC5499553; doi:10.1093/nar/gkx423), 2017-05-26
Supplement: gkx423_supp.pdf [file gkx423_supp.pdf]

# A Novel Method for Mapping Chimeric Protein-Protein Interactions Uncovers Selection Principles of Protein Fusion Events in Cancer

Milana Frenkel-Morgenstern<sup>1,3,\*</sup>, Alessandro Gorohovski<sup>2</sup>, Somnath Tagore<sup>2</sup>, Vaishnovi Sekar<sup>1,4</sup>, Miguel Vazquez<sup>1</sup>, Alfonso Valencia<sup>1,\*</sup>

<sup>1</sup> Structural Biology and BioComputing Programme, Spanish National Cancer Research Centre (CNIO), M.F.Almagro 3, 28029, Madrid, Spain.

<sup>2</sup> Faculty of Medicine, Bar-Ilan-University, Henrietta Szold 8, Safed, Israel

<sup>3</sup> Current address: Faculty of Medicine, Bar-Ilan-University, Henrietta Szold 8, Safed, Israel

<sup>4</sup> Current address: Department of Biology, Lund University, Lund, 22362, Sweden

\*To whom correspondence should be addressed.

## Supplementary Data

**Table S1:** A number of gene occurrences in different biological pathways of ChiPPI networks and frequency of mutations

**Table S2:** Enrichment analysis results for the highly frequent genes in ChiPPI networks and p-values (100 top cases shown)

**Table S3:** Protein domain determination results from Pfam, ELM, UniProt, CDD, SMART, Negatome, Prosite, Interpro, PRINTS, Superfamily, and PIRSF (100 cases shown) for the DDCOS table

**Table S4:** Randomly selected PPI interactors (top 100 cases shown) that have been used to build the DDCOS table

**Table S5:** Randomly selected non-interactors (100 cases shown) for the random dataset

**Table S5:** Randomly selected non-interactors (100 cases shown)

**Table S7:** A list of fusions of gene1 and gene2 and their corresponding number of interactors, number of missing interactors and number of identified cancer pathways using the GO enrichment analysis

**Table S8:** Clustering coefficient, betweenness centrality for PPIs found in normal, random and unified networks of two parental proteins of fusions

**Table S9:** Fusion ID, the number of genes, the number of nodes, the number of edges and corresponding missing interactors

**Table S10:** Fusions incorporating parental proteins which are interactors, change their PPI networks and reduce the number of interactors in the fusion networks w.r.t. networks of parental proteins

**Table S11:** Domain pairs, number of appearances and their frequencies (from the DDCOS table)

**Table S12:** Correlation coefficient matrix for ChiPPI with respect to IDDI, iPfam, DOMINE

**Figure S1:** Enrichment results for MLL\_fusions

**Figure S2:** Enrichment results for ABL\_fusions, ERG\_fusions, RUNX1-fusions, KAT6A

**Figure S3:** Enrichment results for ETV6\_fusions, FUS-fusion

**Figure S4:** Enrichment results for JAK2-fusions, NTRK1-fusion, NUP98

**Figure S5:** Enrichment results for PAX3, PAX5, SS18, TGF

**Figure S6:** Enrichment results for ALK-fusions

**Figure S7:** Enrichment results for EWSRI-fusions

**Figure S8:** Enrichment results for UBC-fusions, HMGA2-fusions

**Figure S8:** Enrichment results for UBC-fusions, HMGA2-fusions

**Table S1: A number of gene occurrences in different biological pathways of ChiPPI networks and frequency of mutations**

| Gene     | Occurrence | Frequency | Synonymous Mutations | NonSynonymous Mutations(cBioPortal) |
|----------|------------|-----------|----------------------|-------------------------------------|
| UBC      | 336        | 0.939     |                      | 0.4872                              |
| Elavl1   | 151        | 0.422     |                      | 0.005187                            |
| HDAC1    | 116        | 0.324     |                      | 0.003858                            |
| SUMO2    | 113        | 0.316     |                      | 0.000701                            |
| HSP90AA1 | 111        | 0.31      |                      | 0.008318                            |
| SUMO1    | 110        | 0.307     |                      | 0.01515                             |
| Cul3     | 109        | 0.304     |                      | 0.011197                            |
| Crebbp   | 109        | 0.304     |                      | 0.040606                            |
| Grb2     | 108        | 0.302     |                      | 0.002924                            |
| Ep300    | 107        | 0.299     |                      | 0.034773                            |
| Nrf1     | 104        | 0.291     |                      | 0.006727                            |
| SIRT7    | 103        | 0.288     |                      | 0.003682                            |
| Hdac2    | 103        | 0.288     |                      | 0.006409                            |
| RNF2     | 100        | 0.279     |                      | 0.004045                            |
| ESR1     | 100        | 0.279     |                      | 0.009682                            |
| Fn1      | 96         | 0.268     |                      | 0.028333                            |
| TP53     | 94         | 0.263     |                      | 0.363515                            |
| BMI1     | 94         | 0.263     |                      | 0.004652                            |
| Cdk9     | 93         | 0.26      |                      | 0.002258                            |
| Ezh2     | 92         | 0.257     |                      | 0.009864                            |
| Cdk2     | 89         | 0.249     |                      | 0.003091                            |
| Ubd      | 87         | 0.243     |                      | 0.001121                            |
| Itga4    | 86         | 0.24      |                      | 0.01953                             |
| Ctnnb1   | 85         | 0.237     | 6.1E-02              | 0.03547                             |
| app      | 85         | 0.237     |                      | 0.009652                            |
| COPS5    | 84         | 0.235     |                      | 0.003682                            |
| VCAM1    | 82         | 0.229     |                      | 0.011606                            |
| Cand1    | 82         | 0.229     |                      | 0.011697                            |
| Shc1     | 81         | 0.226     |                      | 0.004258                            |
| Polr2a   | 81         | 0.226     |                      | 0.013636                            |
| PLCG1    | 81         | 0.226     |                      | 0.011318                            |
| Cul1     | 81         | 0.226     |                      | 0.011909                            |
| Suz12    | 79         | 0.221     |                      | 0.007606                            |
| Hdac3    | 77         | 0.215     |                      | 0.004652                            |
| CUL2     | 77         | 0.215     |                      | 0.008788                            |
| IKBKG    | 76         | 0.212     |                      | 0.001015152                         |
| RPA3     | 74         | 0.207     |                      | 0.001606                            |
| NEDD8    | 74         | 0.207     |                      | 0.001166667                         |
| Map3k5   | 74         | 0.207     |                      | 0.016394                            |
| Stat3    | 73         | 0.204     |                      | 0.010273                            |
| Ilk      | 73         | 0.204     |                      | 0.003560606                         |
| Rpa2     | 72         | 0.201     |                      | 0.002                               |
| Rpa1     | 71         | 0.198     |                      | 0.004485                            |
| Src      | 68         | 0.19      |                      | 0.005682                            |
| NPM1     | 68         | 0.19      |                      | 0.009606                            |
| Akt1     | 68         | 0.19      |                      | 0.006848                            |
| Usp7     | 67         | 0.187     |                      | 0.010879                            |
| Mapk1    | 67         | 0.187     |                      | 0.005379                            |
| COPS6    | 66         | 0.184     |                      | 0.003545                            |
| CUL5     | 65         | 0.182     |                      | 0.007303                            |
| BRCA1    | 64         | 0.179     |                      | 0.020318                            |
| RUNX1    | 63         | 0.176     | 5.4E-04              | 0.009242                            |
| Myc      | 63         | 0.176     |                      | 0.006106                            |
| DCUN1D1  | 63         | 0.176     |                      | 0.002288                            |
| Cul4b    | 63         | 0.176     |                      | 0.009803                            |
| Cul4a    | 63         | 0.176     |                      | 0.005121                            |
| CSNK1E   | 63         | 0.176     |                      | 0.001606                            |
| SMAD3    | 62         | 0.173     |                      | 0.007167                            |
| Stk24    | 61         | 0.17      |                      | 0.005682                            |
| Calm1    | 61         | 0.17      |                      | 0.002227                            |
| Ywhaz    | 60         | 0.168     |                      | 0.002                               |
| Smad4    | 60         | 0.168     |                      | 0.025621                            |
| Sin3A    | 60         | 0.168     |                      | 0.017121                            |
| RIOK2    | 60         | 0.168     |                      | 0.005288                            |
| PRMT1    | 60         | 0.168     |                      | 0.002394                            |
| Ywhaq    | 59         | 0.165     |                      | 0.002121                            |

|          |    |       |          |
|----------|----|-------|----------|
| Whsc1    | 59 | 0.165 | 0.016591 |
| Nono     | 59 | 0.165 | 0.008258 |
| Ybx1     | 58 | 0.162 | 0.003303 |
| Eed      | 58 | 0.162 | 0.004167 |
| Dhx9     | 58 | 0.162 | 0.013333 |
| Rela     | 57 | 0.159 | 0.005197 |
| RB1      | 57 | 0.159 | 0.049515 |
| HIST1H4A | 57 | 0.159 | 0.000348 |
| EEF2K    | 57 | 0.159 | 0.008591 |
| SKP2     | 56 | 0.156 | 0.004652 |
| Pik3r1   | 56 | 0.156 | 0.029955 |
| HSPA8    | 56 | 0.156 | 0.007712 |
| HNRNPUL1 | 56 | 0.156 | 0.010348 |
| HIST1H3A | 56 | 0.156 | 0.002121 |
| Ube2i    | 55 | 0.154 | 0.001576 |
| Tsg101   | 55 | 0.154 | 0.005212 |
| Ncl      | 55 | 0.154 | 0.00647  |
| HIST3H3  | 55 | 0.154 | 0.002394 |
| Gsk3b    | 55 | 0.154 | 0.006152 |
| Csnk1a1  | 55 | 0.154 | 0.002864 |
| Traf3    | 54 | 0.151 | 0.006879 |
| SF1      | 54 | 0.151 | 0.00853  |
| Hnrnpal  | 54 | 0.151 | 0.00397  |
| Egfr     | 54 | 0.151 | 0.037212 |
| Cd81     | 54 | 0.151 | 0.000894 |
| AR       | 54 | 0.151 | 0.015924 |
| Ywhag    | 53 | 0.148 | 0.002258 |
| SMARCB1  | 53 | 0.148 | 0.006409 |
| fus      | 53 | 0.148 | 0.005379 |
| CAMK1    | 53 | 0.148 | 0.002652 |
| XRCC6    | 52 | 0.145 | 0.006091 |
| Top1     | 52 | 0.145 | 0.09379  |
| SNW1     | 52 | 0.145 | 0.006258 |
| HIST2H3C | 52 | 0.145 | 0        |

**Table S2: Enrichment analysis results for the highly frequent genes in ChiPPI networks and p-values (100 top cases shown)**

| #KEGG Pathway ID                          | p-value                     | Ensembl Gene ID                                                                                |
|-------------------------------------------|-----------------------------|------------------------------------------------------------------------------------------------|
| Cell cycle                                | 3.45E-13                    | HDAC1 CREBBP EP300 HDAC2 TP53 CDK2 CUL1 SMAD3 MYC YWHAQ YWHAZ SMAD4 RB1 GSK3B SKP2 YWHAG YWHAE |
| Notch signaling pathway                   | 0.0003794<br>26             | HDAC1 CREBBP EP300 HDAC2 SNW1                                                                  |
| Wnt signaling pathway                     | 7.20E-07                    | CREBBP EP300 TP53 CUL1 CTNNB1 SMAD3 MYC CSNK1E SMAD4 GSK3B CSNK1A1 CSNK2A2                     |
| TGF-beta signaling pathway                | 1.66E-05                    | CREBBP EP300 CUL1 MAPK1 SMAD3 MYC SMAD4 SP1                                                    |
| Adherens junction                         | 5.20E-07                    | CREBBP EP300 CTNNB1 MAPK1 SMAD3 SRC SMAD4 EGFR CSNK2A2                                         |
| Jak-STAT signaling pathway                | 0.0002204<br>92             | CREBBP EP300 GRB2 STAT3 AKT1 MYC PIK3R1 CBL SOCS1                                              |
| Long-term potentiation                    | 0.0145170<br>5              | CREBBP EP300 MAPK1 CALM1                                                                       |
| Melanogenesis                             | 0.0022515<br>69             | CREBBP EP300 CTNNB1 MAPK1 CALM1 GSK3B                                                          |
| NOD-like receptor signaling pathway       | 0.0089821<br>82             | HSP90AA1 IKBKG MAPK1 RELA                                                                      |
| Progesterone-mediated oocyte maturation   | 0.0062938<br>85             | HSP90AA1 CDK2 MAPK1 AKT1 PIK3R1                                                                |
| MAPK signaling pathway                    | 0.0032238<br>55             | GRB2 TP53 IKBKG MAP3K5 MAPK1 AKT1 MYC RELA HSPA8 EGFR                                          |
| ErbB signaling pathway                    | 1.93E-08                    | GRB2 SHC1 PLCG1 MAPK1 AKT1 SRC MYC GSK3B PIK3R1 EGFR CBL                                       |
| Chemokine signaling pathway               | 0.0008918<br>32             | GRB2 SHC1 IKBKG STAT3 MAPK1 AKT1 RELA GSK3B PIK3R1                                             |
| Dorso-ventral axis formation              | 0.0041010<br>55             | GRB2 MAPK1 EGFR                                                                                |
| Osteoclast differentiation                | 0.0013940<br>08             | GRB2 IKBKG MAPK1 AKT1 RELA PIK3R1 SOCS1                                                        |
| Focal adhesion                            | 1.33E-05<br>0.0346220<br>69 | GRB2 FN1 ITGA4 CTNNB1 SHC1 ILK MAPK1 AKT1 SRC GSK3B PIK3R1 EGFR                                |
| Gap junction                              |                             | GRB2 MAPK1 SRC EGFR                                                                            |
| Natural killer cell mediated cytotoxicity | 0.0298061<br>58             | GRB2 SHC1 PLCG1 MAPK1 PIK3R1                                                                   |
| T cell receptor signaling pathway         | 1.42E-05                    | GRB2 PLCG1 IKBKG MAPK1 AKT1 RELA GSK3B PIK3R1 CBL                                              |
| B cell receptor signaling pathway         | 6.40E-06                    | GRB2 IKBKG MAPK1 AKT1 RELA GSK3B PIK3R1 CD81                                                   |
| Fc epsilon RI signaling pathway           | 0.0039288<br>6              | GRB2 PLCG1 MAPK1 AKT1 PIK3R1                                                                   |
| Neurotrophin signaling pathway            | 7.15E-11                    | GRB2 TP53 SHC1 PLCG1 MAP3K5 MAPK1 AKT1 YWHAQ YWHAZ CALM1 RELA GSK3B PIK3R1 YWHAG YWHAE         |
| Insulin signaling pathway                 | 8.94E-05                    | GRB2 SHC1 MAPK1 AKT1 CALM1 GSK3B PIK3R1 CBL SOCS1                                              |
| GnRH signaling pathway                    | 0.0112628<br>94             | GRB2 MAPK1 SRC CALM1 EGFR                                                                      |
| Ubiquitin                                 | 2.28E-07                    | CUL3 CUL1 CUL2 CUL5 CUL4B CUL4A BRCA1 UBE2I SKP2 PARK2 CBL SOCS1                               |

|                                        |             |                                                  |
|----------------------------------------|-------------|--------------------------------------------------|
| mediated proteolysis                   |             |                                                  |
| Apoptosis                              | 0.00660719  | TP53 IKBKG AKT1 RELA PIK3R1                      |
| Bacterial invasion of epithelial cells | 3.83E-05    | FN1 CTNNB1 SHC1 ILK SRC PIK3R1 CBL               |
| Oocyte meiosis                         | 1.78E-05    | CDK2 CUL1 MAPK1 YWHAQ YWHAZ CALM1 AR YWHAG YWHAE |
| Leukocyte transendothelial migration   | 0.019732296 | ITGA4 CTNNB1 VCAM1 PLCG1 PIK3R1                  |
| VEGF signaling pathway                 | 0.003505829 | PLCG1 MAPK1 AKT1 SRC PIK3R1                      |
| Fc gamma R-mediated phagocytosis       | 0.035847433 | PLCG1 MAPK1 AKT1 PIK3R1                          |
| DNA replication                        | 0.012859745 | RPA3 RPA2 RPA1                                   |
| Nucleotide excision repair             | 0.000275145 | RPA3 RPA2 RPA1 CUL4B CUL4A                       |
| Mismatch repair                        | 0.003623952 | RPA3 RPA2 RPA1                                   |
| Homologous recombination               | 0.006381733 | RPA3 RPA2 RPA1                                   |
| Toll-like receptor signaling pathway   | 0.002491995 | IKBKG MAPK1 AKT1 RELA PIK3R1 TRAF3               |
| Adipocytokine signaling pathway        | 0.013816548 | IKBKG STAT3 AKT1 RELA                            |
| Toxoplasmosis                          | 0.000316888 | IKBKG STAT3 MAPK1 AKT1 RELA HSPA8 PIK3R1 SOCS1   |
| mTOR signaling pathway                 | 0.034064433 | MAPK1 AKT1 PIK3R1                                |
| Type II diabetes mellitus              | 0.027713892 | MAPK1 PIK3R1 SOCS1                               |
| Hedgehog signaling pathway             | 0.041105723 | CSNK1E GSK3B CSNK1A1                             |

**Table S3: Protein domain determination results from Pfam, ELM, UniProt, CDD, SMART, Negatome, Prosite, Interpro, PRINTS, Superfamily, and PIRSF (100 cases shown) for the DDCOS table**

| #Cluster No. | amount | Id = Domain_1 --> Domain_1 name                                                                | ... Id = Domain_N --> Domain_N name                                                                                                                                                                                                                                                                                                                                                                                                                                                                                                                                                                                                                                                    |
|--------------|--------|------------------------------------------------------------------------------------------------|----------------------------------------------------------------------------------------------------------------------------------------------------------------------------------------------------------------------------------------------------------------------------------------------------------------------------------------------------------------------------------------------------------------------------------------------------------------------------------------------------------------------------------------------------------------------------------------------------------------------------------------------------------------------------------------|
| CLUS00001    | 1      | IPR023410 = 14-3-3 --> 14-3-3 protein                                                          |                                                                                                                                                                                                                                                                                                                                                                                                                                                                                                                                                                                                                                                                                        |
| CLUS00002    | 1      | IPR006139 = 2-Hacid_dh --> D-isomer specific 2-hydroxyacid dehydrogenase, catalytic domain     |                                                                                                                                                                                                                                                                                                                                                                                                                                                                                                                                                                                                                                                                                        |
| CLUS00003    | 1      | IPR006140 = 2-Hacid_dh_C --> D-isomer specific 2-hydroxyacid dehydrogenase, NAD binding domain |                                                                                                                                                                                                                                                                                                                                                                                                                                                                                                                                                                                                                                                                                        |
| CLUS00004    | 1      | IPR001078 = 2-oxoacid_dh --> 2-oxoacid dehydrogenases acyltransferase (catalytic domain)       |                                                                                                                                                                                                                                                                                                                                                                                                                                                                                                                                                                                                                                                                                        |
| CLUS00009    | 1      | IPR005123 = 2OG-FeII_Oxy --> 2OG-Fe(II) oxygenase superfamily                                  |                                                                                                                                                                                                                                                                                                                                                                                                                                                                                                                                                                                                                                                                                        |
| CLUS00013    | 1      | IPR002562 = 3_5_exonuc --> 3'-5' exonuclease                                                   |                                                                                                                                                                                                                                                                                                                                                                                                                                                                                                                                                                                                                                                                                        |
| CLUS00018    | 1      | IPR006108 = 3HCDH --> 3-hydroxyacyl-CoA dehydrogenase, C-terminal domain                       |                                                                                                                                                                                                                                                                                                                                                                                                                                                                                                                                                                                                                                                                                        |
| CLUS00019    | 1      | IPR006176 = 3HCDH_N --> 3-hydroxyacyl-CoA dehydrogenase, NAD binding domain                    |                                                                                                                                                                                                                                                                                                                                                                                                                                                                                                                                                                                                                                                                                        |
| CLUS00020    | 1      | IPR008379 = 4_1_CTD --> 4.1 protein C-terminal domain (CTD)                                    |                                                                                                                                                                                                                                                                                                                                                                                                                                                                                                                                                                                                                                                                                        |
| CLUS00022    | 1      | IPR006683 = 4HBT --> Thioesterase superfamily                                                  |                                                                                                                                                                                                                                                                                                                                                                                                                                                                                                                                                                                                                                                                                        |
| CLUS00026    | 5      | IPR020045 = 5_3_exonuc --> 5'-3' exonuclease, C-terminal SAM fold                              | IPR020046 = 5_3_exonuc_N --> 5'-3' exonuclease, N-terminal resolvase-like domain;<br>IPR020045 = RNaseH_C --> T4 RNase H, C terminal;<br>IPR006086 = XPGI --> Xeroderma pigmentosum G I-region;<br>IPR006085 = XPGN --> Xeroderma pigmentosum G N-region (N-terminal domain)                                                                                                                                                                                                                                                                                                                                                                                                           |
| CLUS00028    | 2      | IPR008380 = 5_nucleotid --> 5' nucleotidase family                                             | IPR008334 = 5_nucleotid_C --> 5'-nucleotidase, C-terminal domain                                                                                                                                                                                                                                                                                                                                                                                                                                                                                                                                                                                                                       |
| CLUS00033    | 4      | IPR013079 = 6PF2K --> 6-phosphofructo-2-kinase                                                 | IPR001576 = PGK --> Phosphoglycerate kinase                                                                                                                                                                                                                                                                                                                                                                                                                                                                                                                                                                                                                                            |
| CLUS00034    | 1      | IPR006114 = 6PGD --> 6-phosphogluconate dehydrogenase, C-terminal domain                       |                                                                                                                                                                                                                                                                                                                                                                                                                                                                                                                                                                                                                                                                                        |
| CLUS00050    | 6      | IPR001599 = A2M --> Alpha-2-macroglobulin family                                               | IPR011626 = A2M_comp --> A-macroglobulin complement component;<br>IPR002890 = A2M_N --> Alpha-2-macroglobulin family N-terminal region;<br>IPR011625 = A2M_N_2 --> Alpha-2-macroglobulin family N-terminal region;<br>IPR009048 = A2M_recep --> A-macroglobulin receptor;<br>IPR015849 = A4_EXTRA --> Amyloid A4 extracellular domain                                                                                                                                                                                                                                                                                                                                                  |
| CLUS00058    | 3      | IPR001365 = A_deaminase --> Adenosine/AMP deaminase                                            | IPR013659 = A_deaminase_N --> Adenosine/AMP deaminase N-terminal;<br>IPR002466 = ADEAMc --> tRNA -specific and double-stranded RNA adenosine deaminase (RNA-specific editase)                                                                                                                                                                                                                                                                                                                                                                                                                                                                                                          |
| CLUS00065    | 7      | IPR003959 = AAA --> ATPase family associated with various cellular activities (AAA)            | IPR013093 = AAA_2 --> ATPase family associated with various cellular activities (AAA);<br>IPR011703 = AAA_3 --> ATPase family associated with various cellular activities (AAA);<br>IPR007421 = AAA_4 --> Divergent AAA domain;<br>IPR011704 = AAA_5 --> ATPase family associated with various cellular activities (AAA);<br>IPR013153 = AAA_PrkA --> PrkA AAA domain;<br>IPR018631 = AAA-ATPase_like --> Predicted AAA-ATPase                                                                                                                                                                                                                                                         |
| CLUS00074    | 1      | IPR012948 = AARP2CN --> AARP2CN (NUC121) domain                                                |                                                                                                                                                                                                                                                                                                                                                                                                                                                                                                                                                                                                                                                                                        |
| CLUS00081    | 11     | IPR001626 = ABC-3 --> ABC 3 transport family                                                   | IPR004147 = ABC1 --> ABC1 family;<br>IPR013525 = ABC2_membrane --> ABC-2 type transporter;<br>IPR001140 = ABC_membrane --> ABC transporter transmembrane region;<br>IPR010509 = ABC_membrane_2 --> ABC transporter transmembrane region 2;<br>IPR007487 = ABC_sub_bind --> ABC transporter substrate binding protein;<br>IPR003439 = ABC_tran --> ABC transporter;<br>IPR019195 = ABC_ATPase --> Predicted ATPase of the ABC class;<br>IPR017195 = ABC_cobalt --> ABC-type cobalt transport system, permease component;<br>IPR018632 = ABC_transp --> ABC nitrate/sulfonate/bicarbonate family transporter, ATPase subunit;<br>IPR019196 = ABC_transp_aux --> ABC-type uncharacterized |

|           |    |                                                                                              |                                                                                                                                                                                                                                                                                                                                                                                                                                                                                                                                                                                                                                                                                                                                                                                                                                                                                                                                                        |
|-----------|----|----------------------------------------------------------------------------------------------|--------------------------------------------------------------------------------------------------------------------------------------------------------------------------------------------------------------------------------------------------------------------------------------------------------------------------------------------------------------------------------------------------------------------------------------------------------------------------------------------------------------------------------------------------------------------------------------------------------------------------------------------------------------------------------------------------------------------------------------------------------------------------------------------------------------------------------------------------------------------------------------------------------------------------------------------------------|
|           |    |                                                                                              | transport system                                                                                                                                                                                                                                                                                                                                                                                                                                                                                                                                                                                                                                                                                                                                                                                                                                                                                                                                       |
| CLUS00088 | 5  | IPR006693 = Abhydro_lipase --> ab-hydrolase associated lipase region                         | IPR000073 = Abhydrolase --> alpha/beta hydrolase fold;<br>IPR003140 = Abhydrolase_2 --> Phospholipase/Carboxylesterase;<br>IPR013094 = Abhydrolase_3 --> alpha/beta hydrolase fold;<br>IPR013595 = Abhydrolase_4 --> TAP-like protein                                                                                                                                                                                                                                                                                                                                                                                                                                                                                                                                                                                                                                                                                                                  |
| CLUS00095 | 1  | IPR007138 = ABM --> Antibiotic biosynthesis monooxygenase                                    |                                                                                                                                                                                                                                                                                                                                                                                                                                                                                                                                                                                                                                                                                                                                                                                                                                                                                                                                                        |
| CLUS00097 | 1  | IPR000582 = ACBP --> Acyl CoA binding protein                                                |                                                                                                                                                                                                                                                                                                                                                                                                                                                                                                                                                                                                                                                                                                                                                                                                                                                                                                                                                        |
| CLUS00098 | 15 | IPR013537 = ACC_central --> Acetyl-CoA carboxylase, central region                           | IPR001095 = ACCA --> Acetyl co-enzyme A carboxylase carboxyltransferase alpha subunit;<br>IPR003702 = AcetylCoA_hydro --> Acetyl-CoA hydrolase/transferase N-terminal domain;<br>IPR000182 = Acetyltransf_1 --> Acetyltransferase (GNAT) family;<br>IPR001447 = Acetyltransf_2 --> N-acetyltransferase;<br>IPR002864 = Acyl-ACP_TE --> Acyl-ACP thioesterase;<br>IPR009075 = Acyl-CoA_dh_1 --> Acyl-CoA dehydrogenase, C-terminal domain;<br>IPR013107 = Acyl-CoA_dh_2 --> Acyl-CoA dehydrogenase, C-terminal domain;<br>IPR006091 = Acyl-CoA_dh_M --> Acyl-CoA dehydrogenase, middle domain;<br>IPR013786 = Acyl-CoA_dh_N --> Acyl-CoA dehydrogenase, N-terminal domain;<br>IPR014043 = Acyl_transf_1 --> Acyl transferase domain;<br>IPR003157 = Acyl_transf_2 --> Acyl transferase;<br>IPR002656 = Acyl_transf_3 --> Acyltransferase family;<br>IPR001792 = Acylphosphatase --> Acylphosphatase;<br>IPR002123 = PlsC --> Phosphate acyltransferases |
| CLUS00107 | 1  | IPR014788 = AChE_tetra --> Acetylcholinesterase tetramerisation domain                       |                                                                                                                                                                                                                                                                                                                                                                                                                                                                                                                                                                                                                                                                                                                                                                                                                                                                                                                                                        |
| CLUS00111 | 3  | IPR001030 = Aconitase --> Aconitase family (aconitate hydratase)                             | IPR015929 = Aconitase_2_N --> Aconitate hydratase 2 N-terminus;<br>IPR000573 = Aconitase_C --> Aconitase C-terminal domain                                                                                                                                                                                                                                                                                                                                                                                                                                                                                                                                                                                                                                                                                                                                                                                                                             |
| CLUS00118 | 2  | IPR013747 = ACP_syn_III_C --> 3-Oxoacyl-[acyl-carrier-protein (ACP)] synthase III C terminal | IPR008278 = ACPS --> 4'-phosphopantetheinyl transferase superfamily                                                                                                                                                                                                                                                                                                                                                                                                                                                                                                                                                                                                                                                                                                                                                                                                                                                                                    |
| CLUS00121 | 1  | IPR002912 = ACT --> ACT domain                                                               |                                                                                                                                                                                                                                                                                                                                                                                                                                                                                                                                                                                                                                                                                                                                                                                                                                                                                                                                                        |
| CLUS00125 | 1  | IPR004000 = Actin --> Actin                                                                  |                                                                                                                                                                                                                                                                                                                                                                                                                                                                                                                                                                                                                                                                                                                                                                                                                                                                                                                                                        |
| CLUS00126 | 1  | IPR000472 = Activin_recip --> Activin types I and II receptor domain                         |                                                                                                                                                                                                                                                                                                                                                                                                                                                                                                                                                                                                                                                                                                                                                                                                                                                                                                                                                        |
| CLUS00132 | 1  | IPR025652 = Acyl_CoA_thio --> Acyl-CoA thioesterase                                          |                                                                                                                                                                                                                                                                                                                                                                                                                                                                                                                                                                                                                                                                                                                                                                                                                                                                                                                                                        |
| CLUS00179 | 1  | IPR001114 = Adenylsucc_synt --> Adenylosuccinate synthetase                                  |                                                                                                                                                                                                                                                                                                                                                                                                                                                                                                                                                                                                                                                                                                                                                                                                                                                                                                                                                        |
| CLUS00180 | 1  | IPR013154 = ADH_N --> Alcohol dehydrogenase GroES-like domain                                |                                                                                                                                                                                                                                                                                                                                                                                                                                                                                                                                                                                                                                                                                                                                                                                                                                                                                                                                                        |
| CLUS00181 | 1  | IPR002198 = adh_short --> short chain dehydrogenase                                          |                                                                                                                                                                                                                                                                                                                                                                                                                                                                                                                                                                                                                                                                                                                                                                                                                                                                                                                                                        |
| CLUS00183 | 1  | IPR015169 = Adhes-Ig_like --> Adhesion molecule, immunoglobulin-like                         |                                                                                                                                                                                                                                                                                                                                                                                                                                                                                                                                                                                                                                                                                                                                                                                                                                                                                                                                                        |
| CLUS00187 | 1  | IPR000850 = ADK --> Adenylate kinase                                                         |                                                                                                                                                                                                                                                                                                                                                                                                                                                                                                                                                                                                                                                                                                                                                                                                                                                                                                                                                        |
| CLUS00188 | 1  | IPR007862 = ADK_lid --> Adenylate kinase, active site lid                                    |                                                                                                                                                                                                                                                                                                                                                                                                                                                                                                                                                                                                                                                                                                                                                                                                                                                                                                                                                        |
| CLUS00189 | 1  | IPR000043 = AdoHcyase --> S-adenosyl-L-homocysteine hydrolase                                |                                                                                                                                                                                                                                                                                                                                                                                                                                                                                                                                                                                                                                                                                                                                                                                                                                                                                                                                                        |
| CLUS00190 | 1  | IPR015878 = AdoHcyase_NAD --> S-adenosyl-L-homocysteine hydrolase, NAD binding domain        |                                                                                                                                                                                                                                                                                                                                                                                                                                                                                                                                                                                                                                                                                                                                                                                                                                                                                                                                                        |
| CLUS00209 | 1  | IPR008395 = Agenet --> Agenet domain                                                         |                                                                                                                                                                                                                                                                                                                                                                                                                                                                                                                                                                                                                                                                                                                                                                                                                                                                                                                                                        |
| CLUS00211 | 1  | IPR007733 = Agouti --> Agouti protein                                                        |                                                                                                                                                                                                                                                                                                                                                                                                                                                                                                                                                                                                                                                                                                                                                                                                                                                                                                                                                        |
| CLUS00215 | 1  | IPR009436 = AGTRAP --> Angiotensin II, type I receptor-associated protein (AGTRAP)           |                                                                                                                                                                                                                                                                                                                                                                                                                                                                                                                                                                                                                                                                                                                                                                                                                                                                                                                                                        |
| CLUS00216 | 1  | IPR015310 = Aha1_N --> Activator of Hsp90 ATPase, N-terminal                                 |                                                                                                                                                                                                                                                                                                                                                                                                                                                                                                                                                                                                                                                                                                                                                                                                                                                                                                                                                        |
| CLUS00217 | 1  | IPR000866 = AhpC-TSA --> AhpC/TSA family                                                     |                                                                                                                                                                                                                                                                                                                                                                                                                                                                                                                                                                                                                                                                                                                                                                                                                                                                                                                                                        |
| CLUS00221 | 1  | IPR015317 = AHSP --> Alpha-haemoglobin stabilising protein                                   |                                                                                                                                                                                                                                                                                                                                                                                                                                                                                                                                                                                                                                                                                                                                                                                                                                                                                                                                                        |
| CLUS00222 | 1  | IPR002695 = AICARFT_IMPCHas --> AICARFT/IMPCHase bienzyme                                    |                                                                                                                                                                                                                                                                                                                                                                                                                                                                                                                                                                                                                                                                                                                                                                                                                                                                                                                                                        |
| CLUS00227 | 1  | IPR000031 = AIRC --> AIR carboxylase                                                         |                                                                                                                                                                                                                                                                                                                                                                                                                                                                                                                                                                                                                                                                                                                                                                                                                                                                                                                                                        |
| CLUS00228 | 2  | IPR000728 = AIRS --> AIR synthase related protein, N-terminal domain                         | IPR010918 = AIRS_C --> AIR synthase related protein, C-terminal domain                                                                                                                                                                                                                                                                                                                                                                                                                                                                                                                                                                                                                                                                                                                                                                                                                                                                                 |
| CLUS00231 | 1  | IPR018292 = AKAP_110 --> A-kinase anchor protein 110 kDa (AKAP 110)                          |                                                                                                                                                                                                                                                                                                                                                                                                                                                                                                                                                                                                                                                                                                                                                                                                                                                                                                                                                        |
| CLUS00232 | 2  | IPR011079 = Ala_racemase_C --> Alanine racemase, C-terminal domain                           | IPR001608 = Ala_racemase_N --> Alanine racemase, N-terminal domain                                                                                                                                                                                                                                                                                                                                                                                                                                                                                                                                                                                                                                                                                                                                                                                                                                                                                     |
| CLUS00234 | 1  | IPR001731 = ALAD --> Delta-aminolevulinic acid                                               |                                                                                                                                                                                                                                                                                                                                                                                                                                                                                                                                                                                                                                                                                                                                                                                                                                                                                                                                                        |

|           |   |                                                                                                  |                                                                                                                                                                                                                                                   |
|-----------|---|--------------------------------------------------------------------------------------------------|---------------------------------------------------------------------------------------------------------------------------------------------------------------------------------------------------------------------------------------------------|
|           |   | dehydratase                                                                                      |                                                                                                                                                                                                                                                   |
| CLUS00235 | 2 | IPR007698 = AlaDh_PNT_C --> Alanine dehydrogenase/PNT, C-terminal domain                         | IPR007886 = AlaDh_PNT_N --> Alanine dehydrogenase/PNT, N-terminal domain                                                                                                                                                                          |
| CLUS00241 | 2 | IPR000674 = Ald_Xan_dh_C --> Aldehyde oxidase and xanthine dehydrogenase, a/b hammerhead domain  | IPR008274 = Ald_Xan_dh_C2 --> Aldehyde oxidase and xanthine dehydrogenase, molybdopterin binding domain                                                                                                                                           |
| CLUS00244 | 1 | IPR023210 = Aldo_ket_red --> Aldo/keto reductase family                                          |                                                                                                                                                                                                                                                   |
| CLUS00246 | 1 | IPR001303 = Aldolase_II --> Class II Aldolase and Adducin N-terminal domain                      |                                                                                                                                                                                                                                                   |
| CLUS00263 | 2 | IPR010483 = Alpha-2-MRAP_C --> Alpha-2-macroglobulin RAP, C-terminal domain                      | IPR009066 = Alpha-2-MRAP_N --> Alpha-2-macroglobulin RAP, N-terminal domain                                                                                                                                                                       |
| CLUS00267 | 1 | IPR006047 = Alpha-amylase --> Alpha amylase, catalytic domain                                    |                                                                                                                                                                                                                                                   |
| CLUS00271 | 1 | IPR015341 = Alpha-mann_mid --> Alpha mannosidase, middle domain                                  |                                                                                                                                                                                                                                                   |
| CLUS00273 | 1 | IPR008152 = Alpha_adaptinC2 --> Adaptin C-terminal domain                                        |                                                                                                                                                                                                                                                   |
| CLUS00278 | 1 | IPR004166 = Alpha_kinase --> Alpha-kinase family                                                 |                                                                                                                                                                                                                                                   |
| CLUS00279 | 1 | IPR000933 = Alpha_L_fucos --> Alpha-L-fucosidase                                                 |                                                                                                                                                                                                                                                   |
| CLUS00286 | 1 | IPR007798 = Amelin --> Ameloblastin precursor (Amelin)                                           |                                                                                                                                                                                                                                                   |
| CLUS00287 | 1 | IPR004116 = Amelogenin --> Amelogenin                                                            |                                                                                                                                                                                                                                                   |
| CLUS00295 | 2 | IPR006680 = Amidohydro_1 --> Amidohydrolase family                                               | IPR006992 = Amidohydro_2 --> Amidohydrolase                                                                                                                                                                                                       |
| CLUS00298 | 1 | IPR002937 = Amino_oxidase --> Flavin containing amine oxidoreductase                             |                                                                                                                                                                                                                                                   |
| CLUS00299 | 5 | IPR004839 = Aminotran_1_2 --> Aminotransferase class I and II                                    | IPR005814 = Aminotran_3 --> Aminotransferase class-III; IPR001544 = Aminotran_4 --> Aminotransferase class IV; IPR000192 = Aminotran_5 --> Aminotransferase class-V; IPR000653 = DegT_DnrJ_EryC1 --> DegT/DnrJ/EryC1/StrS aminotransferase family |
| CLUS00309 | 1 | IPR005533 = AMOP --> AMOP domain                                                                 |                                                                                                                                                                                                                                                   |
| CLUS00311 | 1 | IPR007865 = AMP_N --> Aminopeptidase P, N-terminal domain                                        |                                                                                                                                                                                                                                                   |
| CLUS00312 | 1 | IPR006828 = AMPKBI --> 5'-AMP-activated protein kinase, beta subunit, complex-interacting region |                                                                                                                                                                                                                                                   |
| CLUS00314 | 1 | IPR000020 = ANATO --> Anaphylotoxin-like domain                                                  |                                                                                                                                                                                                                                                   |
| CLUS00320 | 1 | IPR002110 = Ank --> Ankyrin repeat                                                               |                                                                                                                                                                                                                                                   |
| CLUS00329 | 1 | IPR011417 = ANTH --> ANTH domain                                                                 |                                                                                                                                                                                                                                                   |
| CLUS00336 | 1 | IPR013155 = Anticodon_1 --> Anticodon-binding domain                                             |                                                                                                                                                                                                                                                   |
| CLUS00363 | 1 | IPR013022 = AP_endonuc_2 --> Xylose isomerase-like TIM barrel                                    |                                                                                                                                                                                                                                                   |
| CLUS00371 | 1 | IPR014786 = APC2 --> Anaphase promoting complex (APC) subunit 2                                  |                                                                                                                                                                                                                                                   |
| CLUS00391 | 2 | IPR007904 = APOBEC_C --> APOBEC-like C-terminal domain                                           | IPR013158 = APOBEC_N --> APOBEC-like N-terminal domain                                                                                                                                                                                            |
| CLUS00396 | 1 | IPR000074 = Apolipoprotein --> Apolipoprotein A1/A4/E domain                                     |                                                                                                                                                                                                                                                   |
| CLUS00398 | 1 | IPR002891 = APS_kinase --> Adenylylsulphate kinase                                               |                                                                                                                                                                                                                                                   |
| CLUS00405 | 1 | IPR003313 = AraC_binding --> AraC-like ligand binding domain                                     |                                                                                                                                                                                                                                                   |
| CLUS00424 | 1 | IPR010504 = Arfaptin --> Arfaptin-like domain                                                    |                                                                                                                                                                                                                                                   |
| CLUS00425 | 1 | IPR001164 = ArfGap --> Putative GTPase activating protein for Arf                                |                                                                                                                                                                                                                                                   |
| CLUS00428 | 1 | IPR005148 = Arg_tRNA_synt_N --> Arginyl tRNA synthetase N terminal domain                        |                                                                                                                                                                                                                                                   |
| CLUS00429 | 1 | IPR006035 = Arginase --> Arginase family                                                         |                                                                                                                                                                                                                                                   |
| CLUS00433 | 1 | IPR001606 = ARID --> BRIGHT, ARID (A/T-rich interaction domain) domain                           |                                                                                                                                                                                                                                                   |
| CLUS00435 | 1 | IPR000225 = Arm --> Armadillo/beta-catenin-like repeat                                           |                                                                                                                                                                                                                                                   |
| CLUS00439 | 2 | IPR011022 = Arrestin_C --> Arrestin (or S-antigen), C-terminal domain                            | IPR011021 = Arrestin_N --> Arrestin (or S-antigen), N-terminal domain                                                                                                                                                                             |
| CLUS00455 | 1 | IPR007374 = ASCH --> ASCH domain                                                                 |                                                                                                                                                                                                                                                   |
| CLUS00465 | 1 | IPR001962 = Asn_synthase --> Asparagine synthase                                                 |                                                                                                                                                                                                                                                   |
| CLUS00475 | 2 | IPR006034 = Asparaginase --> Asparaginase                                                        | IPR000246 = Asparaginase_2 --> Asparaginase                                                                                                                                                                                                       |
| CLUS00484 | 1 | IPR017956 = AT_hook --> AT hook motif                                                            |                                                                                                                                                                                                                                                   |
| CLUS00492 | 1 | IPR005144 = ATP-cone --> ATP cone domain                                                         |                                                                                                                                                                                                                                                   |



|           |   |                                                                                            |                                                                                                                                                                                                                                                               |
|-----------|---|--------------------------------------------------------------------------------------------|---------------------------------------------------------------------------------------------------------------------------------------------------------------------------------------------------------------------------------------------------------------|
| CLUS00494 | 1 | IPR013650 = ATP-grasp_2 --> ATP-grasp domain                                               |                                                                                                                                                                                                                                                               |
| CLUS00496 | 1 | IPR022414 = ATP-gua_Ptrans --> ATP:guanido phosphotransferase, C-terminal catalytic domain |                                                                                                                                                                                                                                                               |
| CLUS00497 | 1 | IPR022413 = ATP-gua_PtransN --> ATP:guanido phosphotransferase, N-terminal domain          |                                                                                                                                                                                                                                                               |
| CLUS00499 | 4 | IPR000131 = ATP-synt --> ATP synthase                                                      | IPR000793 = ATP-synt_ab_C --> ATP synthase alpha/beta chain, C terminal domain;<br>IPR004100 = ATP-synt_ab_N --> ATP synthase alpha/beta family, beta-barrel domain;<br>IPR020546 = ATP-synt_DE_N --> ATP synthase, Delta/Epsilon chain, beta-sandwich domain |

**Table S4: Randomly selected PPI interactors (top 100 cases shown) that have been used to build the DDCOS table**

| gene1    | domains1         |                | gene2:         | domains2       |                                          | Number interactions | Score (gene1, gene2) |
|----------|------------------|----------------|----------------|----------------|------------------------------------------|---------------------|----------------------|
| ID3      | HLH              | E2F4           | COILS          | E2F_TDP        |                                          | 2                   | 1.8256               |
| YWHAZ    | 14-3-3           | USP8           | COILS          | RHOD           | USP8_dimer                               | 3                   | 13.5922              |
| KCMF1    | zf-C2H2          | zf-ZZ          | PSMD12         | PINT           |                                          | 2                   | 1.5296               |
| C22orf28 | TM               | CA9            | Carb_anhydrase | TM             |                                          | 2                   | -4.6297              |
| 2-Sep    | COILS            | Ras            | SNX24          | PX             |                                          | 2                   | -1.3829              |
| COPS7B   | COILS            | PINT           | IRF5           | IRF            |                                          | 2                   | 4.0909               |
| INPP5D   | IPPC             | SH2            | PIK3R1         | COILS          | RhoGAP, SH2, SH3                         | 8                   | 14.9473              |
| TMCO7    | DUF2411          | DUF2435        | UBE2S          | UBCc           |                                          | 1                   | 3.0215               |
| NRF1     | Nrf1_activ_bdg   | MTFMT          | Formyl_trans_C | Formyl_trans_N |                                          | 1                   | 5.5865               |
| FKBP8    | FKBP_C           | TM             | PRKAA1         | S_TKc          |                                          | 2                   | 0.5071               |
| REL      | IPT              | RHD            | FOXP3          | COILS          | FH, zf-C2H2                              | 6                   | 5.7914               |
| SMAD9    | DWA              | DWB            | ZNF557         | KRAB           | zf-C2H2                                  | 2                   | 1.4512               |
| RBCK1    | COILS            | RING           | zf-RBZ         | SHARPIN        | zf-RBZ                                   | 3                   | 7.1247               |
| STOM     | Band_7           | TM             | FBXO6          | FBOX           |                                          | 2                   | 1.6039               |
| TRIM17   | BBOX             | COILS          | PRY            | RING           | SPRY, UBE2W, TM, UBCc                    | 10                  | 8.0268               |
| SRC      | SH2              | SH3            | TyrKc          | ERBB3          | FU, Recep_L_domain, TM, TyrKc            | 12                  | 35.2076              |
| 7-Sep    | COILS            | TRA2A          | RRM            |                |                                          | 1                   | 0.5087               |
| ASCC2    | CUE              | SRF            | MADS           |                |                                          | 1                   | 3.1297               |
| IRF7     | IRF              | PIAS4          | SAP            | zf-MIZ         |                                          | 2                   | 5.4793               |
| TRIM33   | BBC              | BBOX           | BROMO          | PHD            | RING, UBE2L, UBCc                        | 5                   | 16.8758              |
| RBL1     | Cyclin           | RBFA           | Rb_C           | SNRPD3         | Sm                                       | 3                   | 6.9754               |
| ATF3     | BRLZ             | HDAC6          | Hist_deacetyl  | zf-UBP         |                                          | 2                   | 5.3859               |
| OPTN     | COILS            | RAB14          | RAB            |                |                                          | 1                   | -0.4647              |
| SRC      | SH2              | SH3            | TyrKc          | DNM2           | DYNc, GED, PH                            | 9                   | 21.2951              |
| SPTBN2   | CH               | PH             | SPEC           | KDM5C          | ARID, JmjC, JmjN, PHD, zf-C5HC2          | 12                  | -3.315               |
| KDR      | IG_like          | IGc2           | TM             | TyrKc          | Ig, SHC2, PTB, SH2                       | 9                   | 11.0634              |
| NR112    | HOLI             | zf-C4          | PRMT1          | MTS            | Methyltransf_11                          | 4                   | 8.7754               |
| AP2B1    | Alpha_adaptin_C2 | B2-adapt-app_C | VCAM1          | C2-set         | IGc2, TM, ig                             | 8                   | 10.0508              |
| TXNRD1   | Glutaredoxin     | Pyr_redox      | Pyr_redox_2    | Pyr_redox_dim  | POU2F2, HOX, Pou                         | 4                   | 4.2015               |
| CEBPD    | BRLZ             | SMAD4          | DWA            | DWB            |                                          | 1                   | 2.9474               |
| RANBP3   | RanBD            | TROVE2         | TROVE          |                |                                          | 1                   | 4.6056               |
| HADHB    | Thiolase_C       | Thiolase_N     | ketoacyl-synt  | GRK5           | Pkinase, RGS, S_TK_X, S_TKc              | 8                   | 13.0973              |
| CUL1     | Cullin           | Cullin_Nedd8   | HSD17B10       | adh_short      |                                          | 2                   | 5.116                |
| NRF1     | Nrf1_activ_bdg   | MRPL12         | Ribosomal_L12  |                |                                          | 1                   | 6.6851               |
| APP      | A4_EXTRA         | COILS          | Ku             | TM             | CMTM3, MARVEL, TM                        | 8                   | -2.3323              |
| SIAH2    | RING             | USP19          | CS             | DUF1872        | TM                                       | 3                   | 2.762                |
| ACTR8    | Actin            | NFRKB          | COILS          |                |                                          | 1                   | 0.2882               |
| ICOS     | TM               | ICOSLG         | C2-set_2       | TM             | ig                                       | 3                   | -6.2003              |
| MAGED1   | COILS            | IRAK1          | Death          | Pkinase        | Pkinase_Tyr                              | 3                   | 1.4189               |
| ANXA1    | ANX              | CSAD           | Aminotran_5    |                |                                          | 1                   | 2.6161               |
| PAWR     | COILS            | DAPK3          | COILS          | S_TKc          |                                          | 2                   | -0.0225              |
| BIRC2    | BIR              | CARD           | RING           | DZIP3          | COILS, RING                              | 6                   | 7.1277               |
| NUF2     | COILS            | ZWINT          | COILS          |                |                                          | 1                   | -0.7182              |
| GSTZ1    | GST_C            | GST_N          | BAG3           | BAG            | WW                                       | 2                   | 5.7362               |
| PRPF8    | JAB_MPN          | PRO8NT         | PROCN          | RRM_4          | U5_2-snRNA_bdg, U6-snRNA_bdg, SUMO1, UBQ | 6                   | 21.4987              |
| TMSB4X   | THY              | ACTA1          | Actin          |                |                                          | 1                   | 2.3676               |
| PDXDC1   | COILS            | GIPC1          | PDZ            |                |                                          | 1                   | -0.3607              |

|          |                 |              |               |                  |                                            |          |          |
|----------|-----------------|--------------|---------------|------------------|--------------------------------------------|----------|----------|
| CTBP2    | 2-Hacid_dh      | 2-Hacid_dh_C | TRNT1         | PolyA_pol        |                                            | 2        | 10.3745  |
| IKBKB    | Pkinase         | Pkinase_Tyr  | TP73          | P53              | SAM_1                                      | 4        | 7.2907   |
| BRCA1    | BRCT            | COILS        | RING          | BRIP1            | DEXDc,HELICc                               | 6        | 7.411    |
| ACVR2B   | Activin_recp    | Pkinase      | Pkinase_Tyr   | TM               | INHBB,TGFB                                 | 4        | 5.6192   |
| ATAD3A   | AAA             | PRKCD        | C1            | C2               | S_TK_X,S_TKc                               | 4        | 2.1479   |
| ELAVL1   | RRM             | HIBADH       | 2-Hacid_dh_C  | NAD_binding_2    |                                            | 2        | 2.772    |
| GNAQ     | G-alpha         | ADRBK1       | PH            | RGS              | S_TK_X,S_TKc                               | 4        | 8.399    |
| GNB2L1   | WD40            | PRKCE        | C1            | C2               | S_TK_X,S_TKc                               | 4        | 0.9464   |
| NFKBIA   | Ank             | RWDD3        | RWD           |                  |                                            | 1        | -1.1809  |
| RAN      | RAN             | EXOSC2       | S1            |                  |                                            | 1        | 4.3825   |
| HNRNP D  | CBFNT           | RRM          | SMURF1        | C2               | HECTc,WW                                   | 6        | 13.0354  |
| UBE2D1   | UBCc            | UBTD1        | UBQ           |                  |                                            | 1        | 3.068    |
| ELK1     | Ets             | MAPK8        | Pkinase       | Pkinase_Tyr      | S_TKc                                      | 3        | 2.5106   |
| EXOSC8   | RNase_PH        | RNase_PH_C   | CWC22         | MA3              | MIF4G                                      | 2        | 6.9934   |
| RPS5     | Ribosomal_S7    | SMURF1       | C2            | HECTc            | WW                                         | 3        | 5.9317   |
| YBX1     | CSD             | CSP          | IFIT3         | TPR              |                                            | 2        | 3.7731   |
| ADAR     | ADEAMc          | dsrm         | z-alpha       | ELAVL1           | RRM                                        | 3        | 5.5648   |
| FBXO6    | FBOX            | LNPEP        | TM            |                  |                                            | -0.55321 | -0.55321 |
| SGK1     | S_TK_X          | S_TKc        | RABAC1        | TM               |                                            | 2        | -1.2327  |
| TOP2B    | HATPase_c       | TOP2c        | TOP4c         | ESR1             | HOLI,zf-C4                                 | 4        | 10.5975  |
| APP      | A4_EXTRA        | COILS        | Ku            | TM               | OBFC1,STN1_2,tRNA_anti                     | 8        | 14.2487  |
| DDX17    | DEXDc           | HELICc       | CSNK2A1       | S_TKc            |                                            | 2        | 1.944    |
| U2AF2    | RRM             | GLIS2        | zf-C2H2       |                  |                                            | 1        | -0.1054  |
| HTRA2    | PDZ             | TM           | Tryp_SPc      | VPS4B            | AAA,MIT,Vps4_C                             | 9        | -4.8253  |
| HDGF     | PWWP            | PSIP1        | COILS         | PWWP             |                                            | 2        | 2.6632   |
| ATF2     | BRLZ            | zf-C2H2      | RB1           | Cyclin           | RBFA,Rb_C                                  | 6        | 10.836   |
| SEN2     | Peptidase_C48   | TM           | NUP153        | Nup_retrotrp_b d | zf-RBZ                                     | 4        | 5.4399   |
| FOS      | BRLZ            | UBR1         | zf-UBR1       |                  |                                            | 1        | 2.3878   |
| ITGA4    | Int_alpha       | TM           | HIST1H1C      | H15              |                                            | 2        | 1.6394   |
| UBE2B    | UBCc            | AHCYL1       | AdoHcyase     | AdoHcyase_N AD   |                                            | 2        | 7.0648   |
| COPB2    | WD40            | COPG2        | Gamma-COP     |                  |                                            | 1        | 2.2192   |
| BRCA1    | BRCT            | COILS        | RING          | SMARCC2          | COILS,Chromo,SANT,SWIRM                    | 12       | 19.1354  |
| MBIP     | COILS           | TADA2A       | SANT          | SWIRM            | zf-ZZ                                      | 3        | 3.8788   |
| STUB1    | COILS           | TPR          | Ubox          | VHL              | VHL                                        | 3        | 9.0443   |
| PSMD11   | PAM             | PINT         | TLE1          | WD40             |                                            | 2        | 4.1727   |
| TRA2A    | RRM             | DHX15        | AAA           | DEXDc            | HA2,HELICc                                 | 4        | 6.3353   |
| CCDC99   | COILS           | NEK9         | S_TKc         |                  |                                            | 1        | 0.6957   |
| MYBL2    | SANT            | HIPK2        | S_TKc         |                  |                                            | 1        | 1.1624   |
| NHP2L1   | Ribosomal_L7 Ae | ITGA4        | Int_alpha     | TM               |                                            | 2        | 1.831    |
| SECISBP2 | Ribosomal_L7 Ae | ATXN7L3      | SCA7          |                  |                                            | 1        | 2.9009   |
| MAP2K6   | S_TKc           | MAP3K5       | COILS         | S_TKc            |                                            | 2        | 2.4474   |
| HADHB    | Thiolase_C      | Thiolase_N   | ketoacyl-synt | ADRB2            | TM                                         | 3        | -3.8406  |
| AMFR     | CUE             | RING         | TM            | CYP2E1           | TM,p450                                    | 6        | -5.8791  |
| FBXW11   | Beta-TrCP_D     | FBOX         | WD40          | TRIM21           | BBOX,PRY,RING,SPRY                         | 12       | 9.0653   |
| KAT2A    | BROMO           | PCAF_N       | WDR5          | WD40             |                                            | 2        | 3.4974   |
| JAK1     | B41             | COILS        | SH2           | STYKc            | TyrKc,INSR,FU,Recep_L_domain, TM,TyrKc,fn3 | 25       | 52.7748  |
| HOXA1    | HOX             | SMOC1        | KAZAL         | SPARC_Ca_bd g    | TY                                         | 3        | -3.3294  |
| VASP     | VASP_tetra      | WH1          | PAAF1         | WD40             |                                            | 2        | 0.8241   |
| CDK2     | Pkinase         | Pkinase_Tyr  | S_TKc         | LGALS3BP         | BACK,SR                                    | 6        | 1.9214   |
| NEDD8    | UBQ             | KPNA2        | Arm           |                  |                                            | 1        | 1.7773   |

**Table S5: Randomly selected non-interactors (100 cases shown) for the random dataset**

| gene1:    | domains1         |                 | gene2:          | domains2  |                                       | Number interactions | score(gene1, gene2) |
|-----------|------------------|-----------------|-----------------|-----------|---------------------------------------|---------------------|---------------------|
| ICAM2     | TM               | KIAA2013        | TM              |           |                                       | 1                   | -2.5009             |
| RAB21     | RAB              | ZNF287          | KRAB            | SCAN      | zf-C2H2                               | 1                   | -1.3431             |
| ABCB6     | AAA              | TM              | NEBL            | LIM       | NEBU, SH3                             | 6                   | -5.7668             |
| EPN1      | ENTH             | UIM             | FOXC2           | FH        |                                       | 1                   | -0.1672             |
| RPRM      | TM               | ZNF383          | KRAB            | zf-C2H2   |                                       | 2                   | -7.5056             |
| GUSB      | Glyco_hydro_2    | Glyco_hydro_2_C | Glyco_hydro_2_N | TM        | REEP5, TM                             | 1                   | -2.5009             |
| NR2C1     | HOLI             | zf-C4           | ARID4B          | ARID      | COILS, Chromo, RBB1NT, TUDOR          | 8                   | 14.9538             |
| SHMT1     | Aminotran_1_2    | SHMT            | SP4             | zf-C2H2   |                                       | 2                   | -3.6191             |
| CSF3R     | Lep_receptor_Ig  | TM              | fn3             | ZNF384    | PNP_UDP_1, zf-C2H2                    | 3                   | -7.2236             |
| FDPS      | polyprenyl_synth | SASH1           | COILS           | SAM_1     | SH3                                   | 1                   | -1.3554             |
| GPA33     | IGc2             | IGv             | TM              | ASCC1     | KH                                    | 1                   | -0.9612             |
| STAM      | SH3              | UIM             | VHS             | THUMPD2   | MTS, Methyltransf_1_1, THUMP, UPF0020 | 2                   | -0.126              |
| C17orf101 | P4Hc             | TM              | TRRAP           | PI3Kc     |                                       | 1                   | -1.1843             |
| FAM173A   | TM               | NEK9            | S_TKc           |           |                                       | 1                   | -0.7506             |
| BNIP1     | SEC14            | NPDC1           | TM              |           |                                       | 1                   | -1.8775             |
| HOXB9     | HOX              | SNX3            | PX              |           |                                       | 1                   | -1.9587             |
| PTGER4    | TM               | ZNF41           | KRAB            | zf-C2H2   |                                       | 2                   | -7.5056             |
| TRPV6     | Ank              | TM              | RPS4Y1          | RS4NT     | S4                                    | 4                   | -1.0025             |
| RAB13     | RAB              | PTPRR           | PTPc            | TM        |                                       | 1                   | -1.5812             |
| DCAF7     | WD40             | VAMP8           | TM              |           |                                       | 1                   | -1.818              |
| B3GNT1    | TM               | CACNA11         | COILS           | TM        |                                       | 2                   | -4.2297             |
| HIC1      | BTB              | zf-C2H2         | FBN2            | EGF       | EGF_CA, TM                            | 5                   | -11.0881            |
| C2        | CCP              | Tryp_Spc        | VWA             | SFTPD     | CLECT                                 | 2                   | -0.1639             |
| ZNF71     | zf-C2H2          | PFN1            | PROF            |           |                                       | 1                   | -1.377              |
| BTBD1     | BACK             | BTB             | PHR             | CLDN1     | TM                                    | 3                   | -6.3921             |
| RBM19     | RRM              | LPCAT2          | EFh             | PlsC      | TM                                    | 3                   | -0.1439             |
| PIGV      | TM               | CYP4V2          | TM              | p450      |                                       | 2                   | -5.0715             |
| GALNT2    | RICIN            | TM              | HTRA3           | IB        | KAZAL, PDZ, Tryp_Spc                  | 5                   | -10.3571            |
| SHISA5    | TM               | PIGW            | TM              |           |                                       | 1                   | -2.5009             |
| VRK2      | Pkinase          | Pkinase_Tyr     | TM              | TMEM184C  | TM                                    | 3                   | -3.9855             |
| ZNF770    | zf-C2H2          | NUMBL           | COILS           | PTB       |                                       | 2                   | -2.1412             |
| CBLC      | Cbl_N            | Cbl_N2          | Cbl_N3          | RING      | SH2, CBX3, ChSh, Chromo               | 3                   | 4.1782              |
| ZNF682    | KRAB             | zf-C2H2         | CFHR3           | CCP       |                                       | 1                   | -2.9526             |
| ERMP1     | TM               | ZCWPW1          | COILS           | PWWP      | zf-CW                                 | 3                   | -7.3852             |
| ATAD1     | AAA              | COILS           | OS9             | COILS     | TM                                    | 4                   | -3.3709             |
| ZNF676    | KRAB             | zf-C2H2         | MTMR4           | COILS     | FYVE                                  | 4                   | -7.3804             |
| SLC4A8    | Band_3_cyto      | TM              | GIGYF1          | COILS     | GYF                                   | 3                   | -6.4657             |
| APOBEC1   | APOBEC_C         | APOBEC_N        | MYOC            | COILS     | OLF                                   | 1                   | -2.0793             |
| IL17RC    | TM               | PER3            | PAC             | PAS       |                                       | 2                   | -3.8776             |
| KCTD13    | BTB              | EHP1L1          | CH              |           |                                       | 1                   | -1.157              |
| SEL1L     | Sel1             | TM              | fn2             | ACP1      | LMWPc, TM                             | 4                   | -4.7834             |
| LYPLA1    | Abhydrolase_2    | Abhydrolase_3   | TRPC5           | Ank       | TM                                    | 2                   | -4.2658             |
| STK16     | Pkinase          | Pkinase_Tyr     | SENP1           | COILS     | Peptidase_C48                         | 4                   | 0.9055              |
| H2AFY     | H2A              | Macro           | RSRC1           | COILS     |                                       | 2                   | -0.1737             |
| NLRP3     | LRR              | LRR_RI          | NACHT           | PCYT1A    | COILS, CTP_transf_2                   | 2                   | -1.6498             |
| MLLT10    | COILS            | PHD             | TM              | FCAMR     | TM, ig                                | 6                   | -12.3036            |
| GOLGA4    | COILS            | GRIP            | MYO10           | B41       | IQ, MYSc, MyTH4, PH                   | 6                   | -5.1996             |
| NOD2      | CARD             | LRR             | NACHT           | TNFRSF10A | Death, TM, TNFR                       | 8                   | -0.788              |
| CCDC86    | COILS            | SNX27           | PDZ             | PX        | RA                                    | 3                   | -2.0107             |
| LCAT      | TM               | IGF2BP1         | KH              | RRM       |                                       | 2                   | -1.5081             |

|          |                 |                |                 |               |                                                          |   |          |
|----------|-----------------|----------------|-----------------|---------------|----------------------------------------------------------|---|----------|
| PSMC2    | AAA             | COILS          | FRS3            | IRS           |                                                          | 1 | -0.5752  |
| IL13RA1  | IL6Ra-bind      | TM             | CD68            | TM            |                                                          | 2 | -4.0599  |
| KLHL26   | BACK            | BTB            | Kelch           | ABI3BP        | TM, fn3                                                  | 5 | -12.5765 |
| UGT2B7   | Glyco_tran_28_C | TM             | XKR6            | TM            |                                                          | 2 | -6.4578  |
| HCRTR1   | TM              | ARHGEF9        | PH              | RhoGEF        | SH3                                                      | 3 | -3.3269  |
| RCOR1    | COILS           | SANT           | PLOD1           | P4Hc          |                                                          | 2 | 1.4143   |
| MAN2B1   | Alpha-mann_mid  | Glyco_hydro_38 | Glyco_hydro_38C | DDX43         | DEXDc,HELICc, KH                                         | 4 | 2.3932   |
| SDK2     | IGc2            | TM             | fn3             | ig            | Pspn, TGFB                                               | 3 | -4.1752  |
| DEPDC1   | DEP             | RhoGAP         | ITGB5           | EGF           | EGF_2, INB, Integrin_B_tail, Integrin_b_cyt, PSI, TM,VWA | 5 | -8.324   |
| EDNRB    | TM              | ZNF383         | KRAB            | zf-C2H2       |                                                          | 2 | -7.5056  |
| STK10    | COILS           | S_TKc          | PSENNEN         | TM            |                                                          | 2 | -2.4794  |
| TMEM50A  | TM              | E4F1           | zf-C2H2         |               |                                                          | 1 | -3.0159  |
| HIST1H1D | H15             | CAMKK2         | S_TKc           |               |                                                          | 1 | 2.7797   |
| NAV3     | AAA             | CH             | COILS           | ATP2A1        | Cation_ATPase_N, Hydrolase, Hydrolase_3, TM              | 8 | -7.393   |
| FAM189A1 | TM              | NFKBIL1        | Ank             | COILS         |                                                          | 2 | -3.5331  |
| LEPREL1  | P4Hc            | AHCYL1         | AdoHcyase       | AdoHcyase_NAD |                                                          | 2 | 5.7568   |
| KITLG    | TM              | TSPAN3         | TM              |               |                                                          | 1 | -2.5009  |
| TRAIP    | COILS           | RING           | SRPRB           | Arf           | GTP_EFTU, TM                                             | 6 | -2.28    |
| SOAT1    | TM              | ZNF485         | KRAB            | zf-C2H2       |                                                          | 2 | -7.5056  |
| SPOCK2   | KAZAL           | SPARC_Ca_bdg   | TY              | PACSIN3       | COILS, FCH, SH3                                          | 3 | -6.7088  |
| AMY2A    | Alpha-amylase   | NRCAM          | IGc2            | TM            | Fn3, ig                                                  | 2 | 0.1058   |
| TSPAN10  | TM              | C19orf12       | TM              |               |                                                          | 1 | -2.5009  |
| F2       | Gla             | KR             | Tryp_SPc        | MTF1          | zf-C2H2                                                  | 1 | -4.7699  |
| SPEF1    | CH              | COILS          | SGOL1           | COILS         | Shugoshin_N                                              | 3 | -0.7263  |
| TSPAN9   | TM              | AKR1A1         | Aldo_ket_red    |               |                                                          | 1 | -2.5706  |
| TRMT112  | Trm112p         | ZDHHC12        | TM              |               |                                                          | 1 | -1.8775  |
| SH2D4A   | SH2             | STX2           | SynN            | TM            | t_SNARE                                                  | 2 | 0.0123   |
| SFI1     | COILS           | RSPH9          | TM              |               |                                                          | 1 | -1.7288  |
| CMTM7    | MARVEL          | TM             | AICDA           | APOBEC_C      | APOBEC_N                                                 | 1 | -2.3294  |
| IRF3     | IRF             | KCNRG          | BTB             |               |                                                          | 1 | 0.7267   |
| ATP10D   | Hydrolase       | TM             | IRF8            | IRF           |                                                          | 1 | -1.5097  |
| LARP4    | La              | RRM            | CSTF2           | RRM           |                                                          | 2 | 3.9464   |
| SNX6     | BAR             | PX             | Vps5            | PTH1R         | HormR, TM                                                | 3 | -2.5887  |
| ZSCAN4   | zf-C2H2         | CBS            | CBS             |               |                                                          | 1 | -2.8239  |
| COL8A2   | C1q             | PODXL2         | COILS           | TM            |                                                          | 2 | -6.1244  |
| ICAM3    | IG_like         | TM             | ig              | NMRAL1        | TrkA_N, adh_short                                        | 3 | -5.5598  |
| TMEM139  | TM              | GSTM1          | GST_C           | GST_N         |                                                          | 1 | -2.0888  |
| CTGF     | CT              | IB             | TSP1            | VWC           | MSMB, TM                                                 | 4 | -9.5449  |
| KDELC1   | CAP10           | IG_FLMN        | OR7A5           | TM            |                                                          | 1 | -0.4252  |
| RRNAD1   | COILS           | CSN2           | COILS           |               |                                                          | 1 | -0.7182  |
| DPYSL3   | Amidohydro_1    | PLA2G2A        | PA2c            | TM            |                                                          | 1 | -1.7821  |
| SESTD1   | SPEC            | ZNF608         | zf-C2H2         |               |                                                          | 1 | -1.0268  |
| GPR101   | TM              | PCDHB7         | CA              | Cadherin_2    | TM                                                       | 3 | -8.2087  |
| MAN1B1   | Glyco_hydro_47  | TM             | IGFLR1          | TM            |                                                          | 2 | -4.0217  |
| ZNF334   | zf-C2H2         | HOMER2         | COILS           | WH1           |                                                          | 2 | -2.4108  |
| FBXO22   | FBOX            | FIST_C         | MATR3           | COILS         | RRM, zf-C2H2, zf-U1                                      | 3 | 0.0353   |
| MEOX1    | HOX             | HSD17B10       | adh_short       |               |                                                          | 1 | -1.7684  |

**Table S6: Threshold values for PPI networks of fusions (examples)**

| Genes of the fusion | Amount of                  |         | Average number of the interactors per fusion |         |                 |
|---------------------|----------------------------|---------|----------------------------------------------|---------|-----------------|
|                     | Interactors without fusion | fusions | active                                       | missing | False-positives |
| EWSR1/ERG           | 649                        | 13      | 513.85                                       | 135.15  | 4.31            |
| SQSTM1/ALK          | 278                        | 1       | 62                                           | 216     | 0               |
| BCR/ABL1            | 204                        | 44      | 179.84                                       | 24.16   | 4.57            |
| FUS/ERG             | 377                        | 1       | 342                                          | 35      | 0               |
| NDRG1/ERG           | 177                        | 2       | 105                                          | 72      | 26              |
| VCL, ALK            | no chimeras                |         |                                              |         |                 |
| TFG/ALK             | 180                        | 5       | 47                                           | 133     | 3.6             |
| KMT2A/GAS7          | 116                        | 6       | 110                                          | 6       | 0               |
| STRN, ALK           | no chimeras                |         |                                              |         |                 |
| TPM3/ALK            | 173                        | 1       | 146                                          | 27      | 0               |
| TPM4/ALK            | 135                        | 2       | 108                                          | 27      | 0               |
| SLC45A3, ERG        | no chimeras                |         |                                              |         |                 |
| TMPRSS2/ERG         | 82                         | 7       | 77.29                                        | 4.71    | 0               |
| SEC31A, ALK         | no chimeras                |         |                                              |         |                 |
| PPFIBP1/ALK         | 91                         | 2       | 37                                           | 54      | 0               |
| UBC/MYC             | 1335                       | 2       | 1088                                         | 247     | 48.5            |
| RBM10/UBC           | 896                        | 2       | 742.5                                        | 153.5   | 6.5             |
| APBB1/UBC           | 914                        | 2       | 13                                           | 901     | 13              |
| COPS5/HNRNPH3       | 812                        | 3       | 672                                          | 140     | 24              |
| FN1, ALK            | no chimeras                |         |                                              |         |                 |
| JAZF1, SUZ12        | no chimeras                |         |                                              |         |                 |
| KMT2A/EP300         | 518                        | 1       | 513                                          | 5       | 0               |
| ASPSCR1/TFE3        | 60                         | 3       | 44                                           | 16      | 0.67            |
| BCOR/CCNB3          | 88                         | 2       | 86                                           | 2       | 0               |
| BCR/FGFR1           | 103                        | 4       | 96                                           | 7       | 0               |
| BCR/PDGFR           | 99                         | 1       | 70                                           | 29      | 14              |
| CREBBP/KAT6A        | 317                        | 4       | 244.75                                       | 72.25   | 13.75           |
| ERG/EWSR1           | 649                        | 13      | 513.85                                       | 135.15  | 4.31            |
| ETV6/ABL1           | 200                        | 1       | 197                                          | 3       | 0               |
| ETV6/ACSL6          | 34                         | 2       | 1                                            | 33      | 1               |
| ETV6/NTRK3          | 45                         | 5       | 38.8                                         | 6.2     | 0               |
| EWSR1/ATF1          | 613                        | 9       | 570.11                                       | 42.89   | 0               |
| EWSR1/ETV4          | 603                        | 2       | 35.5                                         | 567.5   | 24.5            |
| EWSR1/FLI1          | 610                        | 16      | 475.44                                       | 134.56  | 3               |
| EWSR1/NR4A3         | 597                        | 2       | 575.5                                        | 21.5    | 0               |
| EWSR1/PATZ1         | 610                        | 6       | 591.67                                       | 18.33   | 0               |
| FUS/ATF1            | 338                        | 2       | 323                                          | 15      | 0               |
| FUS/CREB3L2         | 330                        | 7       | 241.29                                       | 88.71   | 7               |
| FUS/DDIT3           | 384                        | 4       | 288.5                                        | 95.5    | 16.75           |
| KMT2A/AFDN          | 147                        | 3       | 139.67                                       | 7.33    | 0               |
| KMT2A/AFF1          | 115                        | 56      | 89.84                                        | 25.16   | 7.66            |
| KMT2A/CBL           | 326                        | 1       | 209                                          | 117     | 0               |

|               |     |    |        |       |      |
|---------------|-----|----|--------|-------|------|
| KMT2A/EPS15   | 225 | 1  | 207    | 18    | 0    |
| KMT2A/MAML2   | 100 | 4  | 91     | 9     | 1.5  |
| KMT2A/MLLT1   | 115 | 9  | 89     | 26    | 2.78 |
| KMT2A/MLLT10  | 103 | 8  | 90.38  | 12.62 | 3.62 |
| KMT2A/MLLT3   | 124 | 6  | 93.5   | 30.5  | 4.67 |
| KMT2A/MLLT6   | 120 | 1  | 112    | 8     | 0    |
| MN1/ETV6      | 36  | 2  | 16.5   | 19.5  | 3.5  |
| NPM1/RARA     | 657 | 1  | 224    | 433   | 0    |
| NR4A3/TAF15   | 63  | 3  | 44     | 19    | 40   |
| NR4A3/TFG     | 122 | 1  | 22     | 100   | 0    |
| NUP98/DDX10   | 81  | 4  | 59.5   | 21.5  | 0    |
| NUP98/HOXA9   | 80  | 1  | 37     | 43    | 0    |
| NUP98/HOXC13  | 83  | 1  | 22     | 61    | 0    |
| PAX3/FOXO1    | 73  | 8  | 49.25  | 23.75 | 1.88 |
| PAX5/ETV6     | 43  | 1  | 39     | 4     | 0    |
| PAX7/FOXO1    | 59  | 2  | 57     | 2     | 0    |
| PICALM/MLLT10 | 104 | 4  | 56.25  | 47.75 | 6.25 |
| PML/RARA      | 285 | 9  | 254.11 | 30.89 | 13   |
| RUNX1/RUNX1T1 | 109 | 20 | 59.15  | 49.85 | 4.45 |
| SS18/SSX1     | 49  | 5  | 45.6   | 3.4   | 0    |
| SS18/SSX2     | 59  | 21 | 42     | 17    | 3.67 |

**Table S7: A list of fusions of gene1 and gene2 and their corresponding number of interactors, number of missing interactors and number of identified cancer pathways using the GO enrichment analysis**

| <b>Gene1</b> | <b>Gene2</b> | <b>No. of interactors</b> | <b>No of interactors studied</b> | <b>No. of missing interactors</b> | <b>number of cancer pathways</b> |
|--------------|--------------|---------------------------|----------------------------------|-----------------------------------|----------------------------------|
| ACBD6        | RRP15        | 15                        | 14                               | 1                                 | 0                                |
| ACSL3        | ETV1         | 30                        | 20                               | 10                                | 13                               |
| ACTB         | GLI1         | 185                       | 158                              | 27                                | 31                               |
| ACTG1        | MEPCE        | 259                       | 259                              | 0                                 | 17                               |
| ACTN4        | MLL          | 130                       | 119                              | 11                                | 12                               |
| AFF1         | MLL          | 99                        | 96                               | 3                                 | 8                                |
| AGPAT5       | MCPH1        | 27                        | 27                               | 0                                 | 3                                |
| AGTRAP       | BRAF         | 46                        | 40                               | 6                                 | 37                               |
| AKAP9        | BRAF         | 71                        | 67                               | 4                                 | 42                               |
| ALK          | MSN          | 119                       | 94                               | 25                                | 38                               |
| ANKHD1       | PCDH1        | 15                        | 12                               | 3                                 | 0                                |
| APBB1        | UBC          | 9667                      | 9663                             | 4                                 | 66                               |
| ARFIP1       | FHDC1        | 19                        | 18                               | 1                                 | 0                                |
| ARID1A       | MAST2        | 59                        | 55                               | 4                                 | 6                                |
| ASPSCR1      | TFE3         | 34                        | 32                               | 2                                 | 3                                |
| ATF1         | EWSR1        | 230                       | 201                              | 29                                | 18                               |
| ATG4C        | FBXO38       | 19                        | 17                               | 2                                 | 1                                |
| ATIC         | ALK          | 95                        | 86                               | 9                                 | 35                               |
| BBS9         | PKD1L1       | 1                         | 1                                | 0                                 | 0                                |
| BCAS4        | BCAS3        | 2                         | 2                                | 0                                 | 0                                |
| BCR          | ABL1         | 182                       | 175                              | 7                                 | 39                               |
| BCR          | JAK2         | 139                       | 123                              | 16                                | 41                               |
| BIRC3        | MALT1        | 91                        | 77                               | 14                                | 19                               |
| BRAF         | AKAP9        | 71                        | 67                               | 4                                 | 42                               |
| BSG          | NFIX         | 37                        | 19                               | 18                                | 0                                |
| C2orf44      | ALK          | 63                        | 52                               | 11                                | 34                               |
| CALM1        | RALA         | 252                       | 247                              | 5                                 | 32                               |
| CANT1        | ETV4         | 15                        | 15                               | 0                                 | 1                                |
| CARS         | ALK          | 80                        | 59                               | 21                                | 29                               |
| CCDC6        | RET          | 47                        | 41                               | 6                                 | 15                               |
| CCND1        | TACSTD2      | 79                        | 72                               | 7                                 | 16                               |
| CD74         | ROS1         | 9                         | 8                                | 1                                 | 1                                |
| CDH11        | USP6         | 16                        | 9                                | 7                                 | 4                                |
| CDK6         | MLL          | 175                       | 159                              | 16                                | 11                               |
| CDKN1A       | GAPDH        | 152                       | 348                              | -196                              | 30                               |
| CHCHD7       | PLAG1        | 7                         | 5                                | 2                                 | 2                                |
| CIC          | DUX4         | 14                        | 11                               | 3                                 | 0                                |
| CLCN6        | BRAF         | 40                        | 38                               | 2                                 | 37                               |
| CLTC         | ALK          | 160                       | 148                              | 12                                | 45                               |
| CLTC         | TFE3         | 133                       | 128                              | 5                                 | 23                               |
| CNBP         | USP6         | 61                        | 49                               | 12                                | 5                                |
| COL1A1       | PDGFB        | 44                        | 38                               | 6                                 | 7                                |
| COL1A1       | USP6         | 41                        | 29                               | 12                                | 8                                |
| COL1A2       | PLAG1        | 15                        | 13                               | 2                                 | 3                                |
| COPS5        | HNRNPH3      | 847                       | 841                              | 6                                 | 15                               |
| CREB3L2      | FUS          | 119                       | 101                              | 18                                | 10                               |
| CREB3L2      | PPARG        | 109                       | 97                               | 12                                | 9                                |
| CREBBP       | KAT6A        | 291                       | 289                              | 2                                 | 32                               |
| CRTC1        | MAML2        | 10                        | 10                               | 0                                 | 0                                |
| CRTC3        | MAML2        | 8                         | 8                                | 0                                 | 0                                |
| CTAGE5       | GEMIN2       | 33                        | 33                               | 0                                 | 1                                |
| CTNNB1       | PLAG1        | 243                       | 231                              | 12                                | 31                               |
| CYTH1        | EIF3H        | 66                        | 64                               | 2                                 | 6                                |
| DACH1        | SMAD4        | 157                       | 153                              | 4                                 | 17                               |
| DAZAP1       | MEF2D        | 59                        | 58                               | 1                                 | 14                               |



|         |         |     |     |    |    |
|---------|---------|-----|-----|----|----|
| DDIT3   | FUS     | 159 | 139 | 20 | 17 |
| DDX10   | NUP98   | 44  | 44  | 0  | 9  |
| DDX5    | ETV4    | 169 | 155 | 14 | 19 |
| DDX5    | PIK3CA  | 205 | 184 | 21 | 42 |
| DHX35   | ITCH    | 122 | 109 | 13 | 23 |
| EIF3E   | RSPO2   | 83  | 79  | 4  | 4  |
| EIF3K   | CYP39A1 | 48  | 45  | 3  | 5  |
| EIF4E2  | HJURP   | 31  | 31  | 0  | 1  |
| ELL     | MLL     | 92  | 87  | 5  | 7  |
| EML4    | ALK     | 54  | 44  | 10 | 32 |
| EPC1    | PHF1    | 41  | 37  | 4  | 3  |
| ERC1    | RET     | 53  | 47  | 6  | 21 |
| ERO1L   | FERMT2  | 56  | 46  | 10 | 5  |
| ESRP1   | RAF1    | 115 | 109 | 6  | 42 |
| ETV6    | ABL1    | 157 | 154 | 3  | 34 |
| ETV6    | ACSL6   | 26  | 23  | 3  | 5  |
| ETV6    | ITPR2   | 28  | 24  | 4  | 5  |
| ETV6    | JAK2    | 114 | 102 | 12 | 33 |
| ETV6    | NTRK3   | 35  | 30  | 5  | 10 |
| ETV6    | RUNX1   | 92  | 89  | 3  | 18 |
| EWSR1   | ATF1    | 230 | 201 | 29 | 18 |
| EWSR1   | CREB1   | 308 | 272 | 36 | 25 |
| EWSR1   | DDIT3   | 273 | 237 | 36 | 27 |
| EWSR1   | ERG     | 296 | 267 | 29 | 13 |
| EWSR1   | ETV1    | 231 | 201 | 30 | 28 |
| EWSR1   | ETV4    | 231 | 202 | 29 | 15 |
| EWSR1   | FEV     | 218 | 189 | 29 | 15 |
| EWSR1   | FLI1    | 232 | 202 | 30 | 14 |
| EWSR1   | NFATC1  | 242 | 213 | 29 | 15 |
| EWSR1   | NFATC2  | 242 | 213 | 29 | 21 |
| EWSR1   | NR4A3   | 222 | 193 | 29 | 15 |
| EWSR1   | PATZ1   | 227 | 194 | 33 | 14 |
| EWSR1   | PBX1    | 247 | 211 | 36 | 14 |
| EWSR1   | POU5F1  | 277 | 228 | 49 | 15 |
| EWSR1   | SMARCA5 | 298 | 269 | 29 | 19 |
| EWSR1   | SP3     | 248 | 206 | 42 | 16 |
| EWSR1   | WT1     | 235 | 199 | 36 | 15 |
| EWSR1   | YY1     | 332 | 244 | 88 | 18 |
| EWSR1   | ZNF384  | 223 | 192 | 31 | 15 |
| EWSR1   | ZNF444  | 219 | 189 | 30 | 15 |
| EZR     | ROS1    | 94  | 78  | 16 | 36 |
| FAM131B | BRAF    | 42  | 40  | 2  | 37 |
| FBXL18  | RNF216  | 32  | 31  | 1  | 2  |
|         |         |     |     |    |    |
|         |         |     |     |    |    |
|         |         |     |     |    |    |

**Table S8: Clustering coefficient, betweenness centrality for PPIs found in normal, random and unified networks of two parental proteins of fusions**

| <b>fusion ID</b> | <b>Domain</b>   | <b>Clustering Coefficient</b> | <b>Betweenness Centrality</b> |
|------------------|-----------------|-------------------------------|-------------------------------|
| 1                | 14-3-3          | 0.306683478                   | 4771.693851                   |
| 10010            | FIST_C          | 1                             | 0                             |
| 10017            | Fmp27_GFWDK     | 1                             | 0                             |
| 10024            | FumaraseC_C     | 0.494567404                   | 139.1618418                   |
| 10026            | G8              | 0.833333333                   | 0.550190765                   |
| 10027            | GalKase_gal_bdg | 0.558404558                   | 34.33866934                   |
| 10033            | GluR_Homer-bdg  | 1                             | 0                             |
| 10036            | Glyco_transf_64 | 0.658119658                   | 17.2274655                    |
| 10054            | Hat1_N          | 0.685897436                   | 25.23489569                   |
| 10073            | Ig_Tie2_1       | 0.879120879                   | 0.320459302                   |
| 10075            | IL12p40_C       | 0                             | 0.666666667                   |
| 10085            | Involucrin_N    | 0.815789474                   | 1.101894812                   |
| 10091            | KASH            | 0.830107527                   | 2.441404283                   |
| 10096            | KLRAQ           | 0.861111111                   | 0.134932041                   |
| 10099            | TMEM189_B_dmain | 0.637362637                   | 4.023854834                   |
| 10108            | Lig_chan-Glu_bd | 0.722969024                   | 28.54575142                   |
| 10119            | MAGUK_N_PEST    | 0.619608668                   | 104.760248                    |
| 10122            | Matrilin_ccoil  | 0.637426901                   | 3.90761286                    |
| 10123            | MCC-bdg_PDZ     | 0.475085911                   | 153.6953616                   |
| 10133            | Membr_traf_MHD  | 0.585227273                   | 21.93983955                   |
| 10134            | MENTAL          | 1                             | 0                             |
| 10143            | Misat_Tub_SegII | 0.555688241                   | 250.8426078                   |
| 10146            | MitoNEET_N      | 0.646723647                   | 5.937592722                   |
| 10150            | MMtag           | 0.72                          | 3.787560653                   |
| 10180            | NADH-G_4Fe-4S_3 | 0.651178451                   | 28.24187615                   |
| 10183            | NADH_4Fe-4S     | 0.383275261                   | 67.24389001                   |
| 10186            | NARG2_C         | 0.486166008                   | 15.63267574                   |
| 10195            | Nefa_Nip30_N    | 0.778947368                   | 103.9863172                   |
| 10204            | NMDAR2_C        | 0.828609987                   | 6.761739938                   |
| 10207            | Nrf1_activ_bdg  | 0.791666667                   | 1.309462831                   |
| 10214            | Nup_retrotrp_bd | 0.796234773                   | 8.466862309                   |
| 10216            | OAS1_C          | 0.74789916                    | 6.824415831                   |
| 10218            | Ofd1_CTDD       | 0.682352941                   | 16.2319712                    |
| 1023             | CDC37_C         | 0.637404027                   | 131.2534486                   |
| 10234            | PACT_coil_coil  | 0.747493734                   | 13.90273606                   |
| 1024             | CDC37_M         | 0.634873323                   | 138.3837428                   |
| 1025             | CDC37_N         | 0.637404027                   | 131.2534486                   |
| 1027             | CDC48_2         | 0.388559427                   | 1719.117016                   |
| 1028             | CDC48_N         | 0.916666667                   | 0.048516711                   |
| 10281            | Plug_translocon | 0.715909091                   | 10.71655715                   |
| 10284            | PNPOx_C         | 0.522875817                   | 15.00024794                   |
| 10288            | PP1c_bdg        | 0.804597701                   | 2.774368141                   |
| 10289            | PP28            | 0.822222222                   | 0.295591062                   |
| 10294            | PRCC            | 0.847619048                   | 0.785277941                   |
| 10295            | Proteasome_A_N  | 0.415410539                   | 1355.995429                   |
| 1030             | Cdc6_C          | 0.694352159                   | 19.32939054                   |
| 10306            | CENP-F_C_Rb_bdg | 0.71541502                    | 5.903594789                   |
| 10311            | RFC-E_C         | 0.733333333                   | 11.75409088                   |
| 10313            | Rhodopsin_N     | 0.822222222                   | 0.606174192                   |
| 10321            | RNA_GG_bind     | 0.825757576                   | 3.08257322                    |
| 10325            | Rod_C           | 0.742424242                   | 0.670974093                   |
| 10332            | RRM             | 0.124896445                   | 87808.28817                   |
| 10333            | RRM_4           | 0.734164071                   | 60.20201538                   |
| 10336            | muHD            | 0.881422925                   | 0.798970135                   |
| 10347            | SLBB            | 0.383275261                   | 67.24389001                   |
| 10351            | SPARC_Ca_bdg    | 0.647619048                   | 11.02610968                   |
| 10365            | Syntaxin-18_N   | 0.833333333                   | 1.095996091                   |
| 10368            | TAF8_C          | 0.812865497                   | 1.26293389                    |
| 10380            | Thiol-ester_cl  | 0.598006645                   | 25.0122324                    |
| 10408            | U5_2-snRNA_bdg  | 0.734164071                   | 60.20201538                   |
| 10409            | U6-snRNA_bdg    | 0.734164071                   | 60.20201538                   |
| 10410            | UBA_e1_thiolCys | 0.507271172                   | 520.4596336                   |
| 10417            | UPF0547         | 0.833333333                   | 0.105775791                   |
| 1042             | CDT1            | 0.873399716                   | 3.212276229                   |
| 10436            | Vps39_1         | 0.695652174                   | 9.349559169                   |
| 10438            | WAC_Acf1_DNA_bd | 0.915789474                   | 0.3926115                     |
| 10446            | WWbp            | 0.8                           | 0.764594884                   |

|       |                 |             |             |
|-------|-----------------|-------------|-------------|
| 10456 | YchF-GTPase_C   | 0.765227021 | 11.19199798 |
| 10467 | zf-4CXXC_R1     | 0.771428571 | 13.21490834 |
| 10468 | zf-C3H1         | 0.313799574 | 4991.832125 |
| 10470 | zf-CCHH         | 0.678030303 | 17.14431459 |
| 10471 | zf-CHCC         | 0.719327731 | 7.957137493 |
| 10472 | zf-FCS          | 0.76969697  | 19.52778797 |
| 10477 | 4.1m            | 0.61005661  | 105.0553237 |
| 10480 | ADAM_CR         | 0.66252588  | 43.58660846 |
| 10481 | A_deamin        | 0.772187282 | 21.6555041  |
| 10482 | Cofilin_ADF     | 0.389949627 | 1449.376237 |
| 10483 | Serum_albumin   | 0.424950787 | 736.9668247 |
| 10484 | Annexin         | 0.415841921 | 1431.923602 |
| 10486 | APPLE           | 0.666666667 | 0.05424099  |
| 10487 | AWS             | 0.697032031 | 41.92992328 |
| 10488 | Aamy            | 0.730769231 | 1.833862442 |
| 10489 | Alpha-amylase_C | 0.4         | 17.44383821 |
| 10491 | Amidase_2       | 0.666666667 | 0.821366626 |
| 10493 | B41             | 0.321953306 | 4481.313031 |
| 10494 | B561            | 0.888888889 | 0.144991216 |
| 10495 | BBC             | 0.405191428 | 1739.454561 |
| 10496 | zf-B_box        | 0.281331069 | 7062.956422 |
| 10497 | BCL             | 0.525559366 | 391.1349005 |
| 1050  | CENP-B_dimeris  | 0.76        | 11.88620885 |
| 10500 | Big_2           | 0.62962963  | 9.072532637 |
| 10501 | LBP_BPI_CETP    | 0.472268908 | 42.88520128 |
| 10504 | bZIP_2          | 0.332093083 | 4008.036772 |

**Table S9: Fusion ID, the number of genes, the number of nodes, the number of edges and corresponding missing interactors**

| Fusion ID | Gene1   | Gene2 | Gene 1 |       | Gene 2 |       | Fusion |       | number | Missing interactors                                                                                                                                                                                                                                                                                                                                                                                                                                      |
|-----------|---------|-------|--------|-------|--------|-------|--------|-------|--------|----------------------------------------------------------------------------------------------------------------------------------------------------------------------------------------------------------------------------------------------------------------------------------------------------------------------------------------------------------------------------------------------------------------------------------------------------------|
|           |         |       | nodes  | edges | nodes  | edges | nodes  | edges |        | names of interactors (list)                                                                                                                                                                                                                                                                                                                                                                                                                              |
| EU216071  | BCR     | ABL1  | 51     | 234   | 127    | 843   | 108    | 597   | 48     | PCNA, HSPD1, PAG1, GPX1, CDKN1B, RAD9A, IL3, PSMD4, GAB2, TOPBP1, STON2, HOXA9, SHD, TERF1, CSNK2A2, WASF1, BAG1, YWHAQ, GAB3, RYBP, SFN, MYC, HSPA4, PDE4D, YTHDC1, JUN, TSG101, UBC, HSP90AA1, BCR, ABL1, SHE, HSPA8, CAT, AP2M1, PSMA7, DDB1, RFX1, YWHAB, STK4, AP2A1, ATM, MAPT, PFDN4, TUB, CREB1, VPS28, UNC119                                                                                                                                   |
| AJ298917  | FGFR1   | BCR   | 27     | 75    | 52     | 258   | 44     | 188   | 34     | HSPD1, SHB, IL3, GAB2, HOXA9, ERCC3, FGF1, FGF23, CSNK2A2, FDPS, FGFR1, PPP2R1B, STAT3, CDC42, MYC, HSPA4, UBC, TSG101, BCR, HSP90AA1, HSPA8, RAC1, AP2M1, TP53, FGF2, KPNB1, IGSF21, FRS3, CTPS2, INPP5D, FRS2, BNIP2, VPS28, UNC119                                                                                                                                                                                                                    |
| Z35761    | ETV6    | ABL1  | 27     | 85    | 128    | 867   | 83     | 452   | 68     | PCNA, HSPD1, SIN3A, CDKN1B, PSMA4, MTOR, GAB2, DOK2, FLI1, SHD, CABLES2, TERF1, WASF1, BAG1, YWHAQ, GAB3, XPO1, SFN, HSPA4, SUMO2, PDE4D, HSPA8, SUMO1, AP2M1, EVL, TP53, DDB1, ST5, YWHAH, AP2A1, MAPT, KAT5, SOX2, PAG1, GPX1, RAN, BCAR1, RAD9A, PSMD4, ETV6, TOPBP1, IRF8, STON2, YWHAG, SKP1, RYBP, UBE2I, YTHDC1, JUN, UBC, HSP90AA1, ABL1, CAT, SHE, PRKDC, PSMA7, L3MBTL1, YWHAB, RFX1, STK4, YWHAZ, BMP2K, ATM, YWHAE, PFDN4, TUB, CREB1, HDAC3 |
| EF428110  | PRKAR1A | RARA  | 65     | 206   | 106    | 570   | 64     | 204   | 104    | MMS19, PRDX6, PLEKHF2, SET, PRPF31, TOP2B, WTIP, HDAC4, PRKAR1A, NKX2-1, SMARCD3, TDG, RXRA, AJUBA, NCOA1, GSK3B, AKAP4, MAPK6, HR, BAG1, USP7, ASXL2, CUL3, MAPK1, IRX4, FOXO1, SUZ12, RXRG, MED25, GADD45A, MED6,                                                                                                                                                                                                                                      |

|        |      |      |     |      |     |     |     |     |     |                                                                                                                                                                                                                                                                                                                                                                                                                                                                                                                                                                                                                                                                                                                                                                                                                                                      |
|--------|------|------|-----|------|-----|-----|-----|-----|-----|------------------------------------------------------------------------------------------------------------------------------------------------------------------------------------------------------------------------------------------------------------------------------------------------------------------------------------------------------------------------------------------------------------------------------------------------------------------------------------------------------------------------------------------------------------------------------------------------------------------------------------------------------------------------------------------------------------------------------------------------------------------------------------------------------------------------------------------------------|
|        |      |      |     |      |     |     |     |     |     | <p>PRKACA, RUVBL1, SUMO1, TRIM32, NRBF2, MED1, NCOA6, RSF1, ASXL1, PRAME, ARPC3, NPRL2, PYCARD, C2orf88, AKAP1, SKI, PJA2, PRKX, RUNX1, ARID1A, POU2F1, C2orf44, CAPN11, LRIF1, SPI1, TRIP4, LIMD1, NPM1, PSMC5, MRTO4, MEN1, SOX2, ARFGEF2, RARA, KAT2B, BAHD1, UBE2M, CBS, BAP1, MECR, HDAC9, UBD, GADD45G, AKAP11, NCOR2, SRC, OXSR1, NR0B2, SAP130, PFDN5, RFC2, UBC, ITGB1BP2, PRAM1, HSP90AA4P, SIRT5, TADA3, RFC4, PPP1CA, RAC3, TAB1, MCRS1, ZBED1, SIAH1, KAT2A, NR2E3, NRIP1, GABARAPL1, ARFGEF1, HDAC2, SETD7, UBE3A, HDAC3</p>                                                                                                                                                                                                                                                                                                           |
| U41743 | NPM1 | RARA | 355 | 4318 | 105 | 554 | 172 | 986 | 274 | <p>MMS19, RPL10, ELMO2, NSUN2, PPP1CC, SMARCD3, ENO1, UBL4A, IMPG1, HSPB1, ASXL2, RYK, MAPIB, SMN1, SLC25A3, RXRG, COPS6, PSMD1, SUMO1, TP53, MRPL18, MRPL10, AFF1, COPB1, OTUB1, CHCHD3, LRIF1, GZMM, SIRT7, PSMC5, MRTO4, NUP98, C1QBP, FANCA, VASP, RARA, RPLP0, HNRNPA0, PCBP1, CTNBL1, ATP5A1, CPSF3, GADD45G, TCP1, IRF1, LYAR, SAP130, CDKN1A, CHCHD6, COPS2, PRAM1, LAMP2, PARK7, BOLA2, RPS5, MRPL38, IPO9, CUL2, SNRPD1, SUMO3, USP36, USP15, DNAJA2, NPM3, GNAI2, PRDX6, MYCBP, COPS5, PHKG2, HDAC4, ACY1, PRKAR1A, RPS6, Nup62, EIF2S1, CBX4, CUL4A, RXRA, CAND1, AJUBA, HAND2, CPSF1, MAPK6, HR, CDC14A, SDPR, MAPK1, IRX4, ACACA, SUMO2, IMPDH2, MED25, PYGB, GADD45A, CUL5, RUVBL1, PPM1G, DNAJA1, ASXL1, CSNK2B, SPI1, EIF5A, PADI4, COPE, MRPL52, NAP1L4, SIRT1, MRPL19, PPIL4, HIST3H3, RPL5, MRPL46, SREK1, PAPOLG, ITGB1BP2,</p> |

|        |     |      |     |      |     |     |     |     |     |                                                                                                                                                                                                                                                                                                                                                                                                                                                                                                                                                                                                                                                                                                                                                                                                                                                                                                                                                                                                                                                                                                                                                                                                                                                                                                                                                                                                                                                                                                                                                                                                                                                                                                                                                                                                                                                                                                                                                                                                                                                                                                                                                                                                                                                                |
|--------|-----|------|-----|------|-----|-----|-----|-----|-----|----------------------------------------------------------------------------------------------------------------------------------------------------------------------------------------------------------------------------------------------------------------------------------------------------------------------------------------------------------------------------------------------------------------------------------------------------------------------------------------------------------------------------------------------------------------------------------------------------------------------------------------------------------------------------------------------------------------------------------------------------------------------------------------------------------------------------------------------------------------------------------------------------------------------------------------------------------------------------------------------------------------------------------------------------------------------------------------------------------------------------------------------------------------------------------------------------------------------------------------------------------------------------------------------------------------------------------------------------------------------------------------------------------------------------------------------------------------------------------------------------------------------------------------------------------------------------------------------------------------------------------------------------------------------------------------------------------------------------------------------------------------------------------------------------------------------------------------------------------------------------------------------------------------------------------------------------------------------------------------------------------------------------------------------------------------------------------------------------------------------------------------------------------------------------------------------------------------------------------------------------------------|
|        |     |      |     |      |     |     |     |     |     | <p>           LGALS1, DSTN,<br/>           HDAC5, DCUN1D1,<br/>           PSMD12, NR2E3,<br/>           SLC25A5, EIF3E,<br/>           YWHAE, MRPL24,<br/>           IPO5, UBE3A, MRPL39,<br/>           ARRB1, RPL10L,<br/>           CENPA, RIOK2, TXN,<br/>           MRPL12, RPS28, TDG,<br/>           ICT1, HSPA5, JUNB,<br/>           CDT1, CFL1, YWHAQ,<br/>           CBX8, SRRT, USP7,<br/>           XPO1, CUL3, KIF11,<br/>           RPLP1, MED6, COPG1,<br/>           PHB, NRBF2, RPS12,<br/>           MED1, SLAIN2, CCT2,<br/>           RSF1, FBXO6, MRPL50,<br/>           PRAME, PPP2R1A, SKI,<br/>           POU2F1, PSME3, NPM1,<br/>           EEF1B2, RRP1B,<br/>           HIST1H3A, CDKN2A,<br/>           HIST1H1C, MRPL28,<br/>           MECR, POLR2E,<br/>           DOCK4, SENP3, APEX1,<br/>           PPA1, EEF2K, RPL6,<br/>           MRPS26, MRPL11,<br/>           AKAP11, RPS4X,<br/>           NIPSNAP1, EIF3M,<br/>           HIST1H4A, SAMM50,<br/>           KCTD2, RANBP6,<br/>           TXNDC12, TUBA1C,<br/>           STK38, H2AFX, RFC4,<br/>           BAG2, KAT2A,<br/>           CSNK1A1, NRIP1,<br/>           TTC27, RPL24, HOXA7,<br/>           MRPL54, NKX2-1,<br/>           MRPL49, MRPS30,<br/>           SNRPF, NCAPG,<br/>           CSNK2A1, NUDCD1,<br/>           CHCHD4, EIF3H,<br/>           RPL14, BAG1, FBXO25,<br/>           SPIN1, CSDA, HSPA4,<br/>           FOXO1, MRPL37,<br/>           PAN2, SUZ12, EIF3G,<br/>           FANCC, RELA, TRRAP,<br/>           H1FX, TRIM32,<br/>           CDK5RAP3, NUDT21,<br/>           HIST1H1A, S100A11,<br/>           NCOA6, HIST2H2AC,<br/>           TEX15, PRKAA1,<br/>           PARD6B, MRPL53,<br/>           HIST2H2BE, TRIP4,<br/>           OSBP, TRMT61A,<br/>           UQCRH, KAT2B,<br/>           PSMD4, KCTD5, BAP1,<br/>           EEF1G, MRPL44,<br/>           DNAJC13, NR0B2,<br/>           TFAP2A, CPSF2,<br/>           CDC37, UBC, PPP2CA,<br/>           HSP90AA1, TADA3,<br/>           S100A10, PA2G4,<br/>           NAP1L1, RAC3,<br/>           DYRK2, TAB1, CUL1,<br/>           FMNL1, SIAH1,<br/>           YWHAZ, TOP1, HJURP,<br/>           MRPL43, SNRPD2,<br/>           HDAC3, ARMCX3         </p> |
| M73779 | PML | RARA | 155 | 1246 | 105 | 537 | 108 | 518 | 121 | <p>           MMS19, SIN3A,<br/>           HDAC4, NKX2-1,<br/>           CDK1, SMARCD3,<br/>           GATA2, CSNK2A1,<br/>           ZNF506, MTOR,<br/>           PSMA3, FOS, RUNX3,<br/>           RXRA, AJUBA, MAPK6,<br/>           MAF, HR, BAG1, USP7,<br/>           ASXL2, NR2C1,<br/>           MAPK1, IRX4, FOXO1,<br/>           SUMO2, RXRG, SUZ12,<br/>           MED25, TERT, IKBKE,         </p>                                                                                                                                                                                                                                                                                                                                                                                                                                                                                                                                                                                                                                                                                                                                                                                                                                                                                                                                                                                                                                                                                                                                                                                                                                                                                                                                                                                                                                                                                                                                                                                                                                                                                                                                                                                                                                                |

|          |       |       |    |     |     |     |    |     |    |                                                                                                                                                                                                                                                                                                                                                                                                                                                                                                                                                                                                                                             |
|----------|-------|-------|----|-----|-----|-----|----|-----|----|---------------------------------------------------------------------------------------------------------------------------------------------------------------------------------------------------------------------------------------------------------------------------------------------------------------------------------------------------------------------------------------------------------------------------------------------------------------------------------------------------------------------------------------------------------------------------------------------------------------------------------------------|
|          |       |       |    |     |     |     |    |     |    | LMNA, GADD45A, MED6, RELA, TERF2IP, RUVBL1, NFATC1, PIAS1, SUMO1, TRIM32, TGIF1, TP53, RPL11, IER3, NRBF2, MED1, SRF, CDK6, SAP25, NCOA6, CSNK2A1P, RSF1, ASXL1, PRAME, MAP2K4, RNF111, PCBD2, SKI, SMAD3, PSME3, KAT5, TCF4, LRIF1, CCNT1, TRIP4, SATB1, NPM1, SPII, PSMC5, PLSCR1, MRTO4, CASP8AP2, SIAH2, RARA, KAT2B, AURKA, EIF4E, BAP1, TOPBP1, MECR, UBE2U, POLR2E, SIRT1, PML, ELF4, GADD45G, SKP1, TOPORS, NR0B2, UBE2I, MED7, ADH1B, MYC, MAGEA2, SAP130, JUN, SENP6, UBC, ITGB1BP2, PRAM1, TADA3, ZFYVE9, RFC4, H2AFX, PIAS2, RAC3, RBX1, NR4A1, CUL1, KAT2A, SIAH1, NR2E3, NRIP1, HHEX, RNF4, DAXX, MAPK11, HDAC7, UBE3A, HDAC3 |
| AF012304 | NUMA1 | RARA  | 48 | 213 | 106 | 570 | 82 | 381 | 69 | MMS19, HDAC4, NKX2-1, SMARCD3, TDG, AJUBA, ACTR1A, TERF1, HR, BAG1, USP7, TERF2, YWHAQ, ASXL2, IRX4, FOXO1, SUMO2, SUZ12, MED25, LMNA, GADD45A, MED6, SMC1A, TERF2IP, RUVBL1, SUMO1, SMC3, TRIM32, NRBF2, MED1, DDB1, CDK6, RSF1, ASXL1, PRAME, SKI, LRIF1, SPII, DYNLL1, NPM1, SIRT7, TRIP4, MRTO4, NUP98, RARA, KAT2B, BAP1, MECR, KIAA0101, GADD45G, BANF1, NR0B2, CBX6, SAP130, UBC, ITGB1BP2, PRAM1, TADA3, HSP90AA1, PIM1, RAC3, YEATS4, HDAC5, KAT2A, SIAH1, NRIP1, NUMA1, HDAC3, RPAP1                                                                                                                                              |
| AF041811 | ETV6  | NTRK3 | 27 | 85  | 10  | 14  | 9  | 12  | 29 | SHC1, SUMO2, HDAC6, UBC, SIN3A, SOX2, ELAVL1, NTRK3, IRAK3, HSP90AA1, SOCS3, SOCS1, GAB2, SUMO1, ETV6, FLI1, PTPN1, IRF8, L3MBTL1, HDAC9, NTF3, FRS2, SKP1, CRKL, KAT5, UBE2I, ACTA1, FBXL6, HDAC3                                                                                                                                                                                                                                                                                                                                                                                                                                          |
| DQ841178 | PAX5  | ETV6  | 9  | 12  | 27  | 85  | 10 | 16  | 27 | SUMO2, HDAC6, RB1, UBC, SIN3A, SOX2, ELAVL1, SOCS3,                                                                                                                                                                                                                                                                                                                                                                                                                                                                                                                                                                                         |

|          |        |        |     |      |     |      |   |    |     |                                                                                                                                                                                                                                                                                                                                                                                                                                                                                                                                                                                                                                                                                                                                                                                                                                                                                                                                                                                                                                                                                                                                                                                                                                                                                        |
|----------|--------|--------|-----|------|-----|------|---|----|-----|----------------------------------------------------------------------------------------------------------------------------------------------------------------------------------------------------------------------------------------------------------------------------------------------------------------------------------------------------------------------------------------------------------------------------------------------------------------------------------------------------------------------------------------------------------------------------------------------------------------------------------------------------------------------------------------------------------------------------------------------------------------------------------------------------------------------------------------------------------------------------------------------------------------------------------------------------------------------------------------------------------------------------------------------------------------------------------------------------------------------------------------------------------------------------------------------------------------------------------------------------------------------------------------|
|          |        |        |     |      |     |      |   |    |     | SOCS1, SUMO1, GAB2, ETV6, FLI1, IRF8, L3MBTL1, HDAC9, PAX5, SKP1, CRKL, MYB, KAT5, DAXX, ID3, UBE2I, HDAC3, FBXL6, ACTA1                                                                                                                                                                                                                                                                                                                                                                                                                                                                                                                                                                                                                                                                                                                                                                                                                                                                                                                                                                                                                                                                                                                                                               |
| AA828778 | CREBBP | CREBBP | 258 | 2396 | 258 | 2396 | 8 | 12 | 251 | VDR, LIG4, SMAD1, CDC16, HCK, YY1, ZCCHC12, TDG, FOS, KLF13, DEK, RPA2, ACTA2, NPAS2, ABCA1, SP3, ANAPC7, TACC2, MYBL1, JUNB, SMARCB1, TBX21, TCF3, CSNK2A2, PPARGC1A, SREBF1, PTMA, NEUROG1, CPSF6, NCOA3, KLF1, HIST4H4, WDR5, CDC27, NFKB2, EPAS1, PYGO2, STAT2, NFE2, IFNAR2, MAFK, TP53, REL, CDC20, EWSR1, IRF5, CEBPD, FOXO3, CSK, CITED2, MYH9, KHDRBS1, EP300, ATF2, MDC1, HNF1A, KAT5, APC, BCL6, MSX1, TLR2, XRCC6, TBP, PSMC5, DDX5, GRIP1, NUP98, SREBF2, STAT6, TRERF1, SETD1A, HIST1H3A, KLF5, RARA, ING1, CARM1, IKBKG, SMARCC2, MEIS1, GLI3, SMAD2, SMARCC1, PML, MIER1, ZBTB2, CEBPB, PAPOLA, KPNA6, HMGA1, SND1, HIST1H4A, FGFR1, HOXB7, IRF1, MYC, KAT6A, PELP1, CREBBP, PTMS, CDKN1A, JUN, IRF3, HOXB3, IRF9, E2F1, RBBP7, RPS6KA1, NCOR1, NPAT, PHOX2A, AR, MAPK10, ETS2, N4BP2, HDAC2, HOXB9, CCNC, RPS6KA5, HOXB2, DAXX, IRF7, HOXA10, ONECUT1, ATF1, RBBP4, MGMT, MTDH, RAD23A, ESR2, ELAVL1, LYN, NKX2-1, ETS1, NCOA2, TCF12, E2F3, CSNK2A1, HIPK2, AKT1, NFATC4, MAP3K5, CNTN2, SH3GL1, SERTAD1, NCOA1, GTF2B, HOXB6, PPARG, CHUK, MAF, SNIP1, ATF4, CITED1, STAT3, HNF4A, FOXO1, ATG3, MED25, HBP1, HIF1A, RELA, FOSL1, CTBP1, MED21, TP73, NFYB, FOXO4, RUVBL1, TGS1, HOXD12, ANAPC2, KPNA2, KLF8, SRF, ZNF639, STAT1, NCOA6, MYBL2, PTOV1, TAF6L, SMAD3, |



|          |         |       |    |     |    |     |    |     |    |                                                                                                                                                                                                                                                                                                                                                                                                                                                                                                |
|----------|---------|-------|----|-----|----|-----|----|-----|----|------------------------------------------------------------------------------------------------------------------------------------------------------------------------------------------------------------------------------------------------------------------------------------------------------------------------------------------------------------------------------------------------------------------------------------------------------------------------------------------------|
|          |         |       |    |     |    |     |    |     |    | HOXD13, RUNX1, ATF3, HOXD4, CUX1, HIST2H2BE, PRLR, TRIM28, HMGB2, TRIP4, HDAC1, POU1F1, NLK, MDM2, KAT2B, ATXN3, EGR1, HOXB4, NFATC2, ANAPC5, MKNK1, RPS6KA3, HOXA9, KDM3B, SS18L1, IKBKB, MSH2, FOSB, GCM1, MAML1, HIST3H3, NCOR2, SP1, SRC, CDK2, GATA1, PBX1, RPS6KA2, CCNE1, HDAC6, RUNX2, UBC, EBF1, HOXD10, SMARCA2, FOXM1, POLR2A, PLAGL1, HMGB1, NFE2L2, RAC3, HTT, PIAS3, MSH6, HES6, MTF1, PARP1, NR5A1, KLF4, NR3C1, POT1, AIRE, MECOM, CDK8, MYOD1, MYB, ESR1, CREB1, DDX17, HDAC3 |
| AB084281 | KAT6A   | ASXL2 | 31 | 154 | 7  | 13  | 7  | 9   | 31 | PRPF40A, HDAC1, WDR5, ATN1, HIST2H3C, UBC, H3F3C, HDAC4, ELAVL1, HIST1H3A, SIRT5, RERE, BAP1, TP53, MAFK, UBE2U, ATXN1, HIST1H4I, MEAF6, EP300, HDAC8, HIST3H3, RUNX1, HDAC2, HIST1H4A, ASXL2, ING5, TRAF6, HDAC3, KAT6A, HSPA4                                                                                                                                                                                                                                                                |
| AY222643 | CREB3L2 | PPARG | 13 | 22  | 83 | 442 | 39 | 111 | 57 | FABP1, ZBTB3, COPS5, RB1, RND1, BCAS2, ESR2, HDAC4, NLK, ELAVL1, RGS16, RAD54L2, SMARCD3, DNNTIP2, RXRA, CEBPB, PPARG, GADD45G, FHOD1, CDC34, MED24, PPARGC1A, SP1, CREB3L2, PTP4A1, MAFF, NCOA4, NR0B2, TFAP2A, MSX2, SUMO2, SERPINH1, UBC, RELA, ZNHIT3, MIF4GD, ZBTB9, CEP19, NR0B1, SUMO1, PIAS1, CLU, MED1, NCOA6, MED14, NR2E3, KCTD13, TNP1, ZBTB5, NRIP1, ANP32A, GCFC2, EDF1, KAT5, HDAC3, LRIF1, TRIP4                                                                               |
| AY678451 | DAZAP1  | MEF2D | 20 | 81  | 32 | 122 | 8  | 8   | 42 | HDAC1, MAPK7, COPS5, MEN1, HDAC4, ELAVL1, MEF2A, KAT2B, DAZ1, CARM1, NFATC2, RAD52, SENP3, CAND1, MEF2D, SP1, YWHAQ, PRMT5, CUL3, SUMO2, SNCA, UBC, ASH2L, RBBP5, MAPK14, SIRT5, CUL5, PRKACA, NEDD8, SUMO1, CUL2, CUL4B, CDK6, CUL1,                                                                                                                                                                                                                                                          |

|          |       |       |     |      |    |     |    |    |     |                                                                                                                                                                                                                                                                                                                                                                                                                                                                                                                                                                                                                                                                                                                                                                                                                                                                  |
|----------|-------|-------|-----|------|----|-----|----|----|-----|------------------------------------------------------------------------------------------------------------------------------------------------------------------------------------------------------------------------------------------------------------------------------------------------------------------------------------------------------------------------------------------------------------------------------------------------------------------------------------------------------------------------------------------------------------------------------------------------------------------------------------------------------------------------------------------------------------------------------------------------------------------------------------------------------------------------------------------------------------------|
|          |       |       |     |      |    |     |    |    |     | HDAC5, DAZAP1, EP300, ASCL1, DAZL, HDAC3, ITCH, ITGA4                                                                                                                                                                                                                                                                                                                                                                                                                                                                                                                                                                                                                                                                                                                                                                                                            |
| EU236945 | CD74  | ROS1  | 5   | 7    | 6  | 8   | 5  | 5  | 7   | PTPN6, ROS1, IKBKG, UBC, MIF, PTPN11, CD74                                                                                                                                                                                                                                                                                                                                                                                                                                                                                                                                                                                                                                                                                                                                                                                                                       |
|          |       |       |     |      |    |     |    |    |     | SHC1, PLSCR1, RGS19, COPS5, GIPC1, BABAM1, RAD21, MST4, RIOK2, SH2B1, STK24, MYOT, MYCN, CUL4A, PALM2-AKAP2, PTPN1, UBD, ARL15, NTF3, CAND1, EEF2K, GBP2, SP1, CUL3, TRAF6, MYC, HSPA4, CAV1, TP53RK, CRMP1, CDC37, COPS6, UBC, TSG101, NGF, HSP90AA1, BRE, KIAA1377, CUL5, MATK, PIAS2, NEDD8, PPP1CA, CDK9, NTRK1, SH2B2, CUL2, CUL4B, STAT5B, VRK1, STK4, CUL1, DCUN1D1, SHC3, ARHGAP32, FRS2, RAPIA, GPRASP1, EHBP1L1, TFG                                                                                                                                                                                                                                                                                                                                                                                                                                   |
| X85960   | TFG   | NTRK1 | 45  | 171  | 33 | 107 | 17 | 30 | 60  |                                                                                                                                                                                                                                                                                                                                                                                                                                                                                                                                                                                                                                                                                                                                                                                                                                                                  |
|          |       |       |     |      |    |     |    |    |     | HNRNPUL1, C11orf16, SMNDC1, YBX1, NDUFV1, CDK4, RIOK2, PRTFDC1, STK24, GNPDA1, WWP2, E2F8, RALYL, PRMT1, ITGA5, RNF168, MRPS9, GPBP1L1, NDUFB1, WBP4, USP7, RFX3, CUL3, WT1, CPSF6, ILK, SMN1, TONSL, COPS6, EPAS1, CUEDC2, DYNLL2, MATK, CUL4B, TP53, EWSR1, RHOXF2, EP300, PRUNE2, SRSF5, SERP2, SMAD4, MSC, SIRT7, HIST1H2BN, PLSCR1, FUS, MEN1, C19orf57, MST4, DFFA, TMEM126A, POLR3A, HLTF, PCBP1, U2AF2, UBD, CD2BP2, EEF2K, TRAF3, HAS1, MBD3, HMGN4, HMGA1, PAWR, YY1AP1, PTK2B, NTNG2, KEL, DNAJB3, TSG101, IRF3, DVL3, CCDC7, MYO1F, CSNK1E, CDK9, CUL2, MNS1, C10orf12, SNRPC, GORASP2, MYOZ2, CSNK1A1, KCNMB1, CCDC91, MCAT, CALM1, CXADR, MAGEA11, ARHGDIA, NONO, HDAC2, CPSF7, NPM3, TAOK1, PUF60, RASL11B, EPT1, CAMK1, KHDRBS2, COPS5, RAD23A, PHKG2, HERPUD1, ELAVL1, HSPA2, AGT, ELK1, POU4F1, SFXN1, BNIP3L, MDFI, MVK, CUL4A, CHERP, CD177, |
| S74529   | EWSR1 | WT1   | 214 | 1100 | 18 | 32  | 34 | 42 | 196 |                                                                                                                                                                                                                                                                                                                                                                                                                                                                                                                                                                                                                                                                                                                                                                                                                                                                  |

|          |       |      |     |      |    |    |    |    |     |                                                                                                                                                                                                                                                                                                                                                                                                                                                                                                                                                                                                                                                                                                                                                                                                                                                           |                                                                                                                                                                                                                                                                                                                                                                                                                                                                                                                                                                                 |
|----------|-------|------|-----|------|----|----|----|----|-----|-----------------------------------------------------------------------------------------------------------------------------------------------------------------------------------------------------------------------------------------------------------------------------------------------------------------------------------------------------------------------------------------------------------------------------------------------------------------------------------------------------------------------------------------------------------------------------------------------------------------------------------------------------------------------------------------------------------------------------------------------------------------------------------------------------------------------------------------------------------|---------------------------------------------------------------------------------------------------------------------------------------------------------------------------------------------------------------------------------------------------------------------------------------------------------------------------------------------------------------------------------------------------------------------------------------------------------------------------------------------------------------------------------------------------------------------------------|
|          |       |      |     |      |    |    |    |    |     |                                                                                                                                                                                                                                                                                                                                                                                                                                                                                                                                                                                                                                                                                                                                                                                                                                                           | <p>ACTL6A, KRR1, CAND1, MRPS18B, GSK3B, ECD, HNRNPA1, CD81, HSPA4, DMRTB1, SUZ12, VPS72, ATN1, HBP1, MAPK1IP1L, CUL5, BARD1, FAM131C, DNMT1, WWP1, KXD1, LILRA3, RNF183, TRIM5, MYL6, ELAVL4, WDR37, SUPT4H1, CFDP1, NBPF3, SSBP2, CDK12, CIAO1, NDUFA5, CETP, RAD21, TDRD3, MTMR9, MTCF1, EGR1, BLZF1, TRIM37, FXR2, NDRG1, NPPB, MRP63, PDHX, ELAVL3, WTAP, CEBPA, UBE2I, CDK2, CNST, HAX1, BAD, RPS15A, RMND5B, SF3B4, SF1, UBC, RBPMS, PRRC2A, NSUN4, TULP2, POLR2A, NEDD8, PGLS, SAP30BP, EZH2, DCUN1D1, CUL1, TPGS2, RAB37, DHX9, ZNF165, TMSB4Y, RPL31, HDAC3, ITGA4</p> |
| AF327066 | EWSR1 | FLI1 | 214 | 1100 | 15 | 42 | 30 | 33 | 198 | <p>HNRNPUL1, C11orf16, SMNDC1, YBX1, NDUFV1, CDK4, ROK2, PRTFDC1, STK24, GNPDA1, WWP2, E2F8, RALYL, PRMT1, ERCC5, FLI1, ITGA5, RNF168, MRPS9, GPBP1L1, NDUFB1, WBP4, USP7, REX3, CUL3, CPSF6, ILK, SMN1, KLF1, TONSL, COPS6, EPAS1, CUEDC2, DYNLL2, MATK, SUMO1, CUL4B, TP53, EWSR1, RHOF2, EP300, PRUNE2, SRSF5, SERP2, SMAD4, MSC, SIRT7, HIST1H2BN, PLSCR1, FUS, C19orf57, MST4, DFFA, TMEM126A, POLR3A, HLTF, ETV6, PCBP1, UBD, CD2BP2, EEF2K, TRAF3, HAS1, MBD3, HMGN4, HMGA1, YY1AP1, PTK2B, NTNG2, KEL, DNAJB3, TSG101, IRF3, CCDC7, MYO1F, CSNK1E, PIAS2, SMAD9, CDK9, CUL2, MNS1, C10orf12, SNRPC, GORASP2, MYOZ2, CSNK1A1, KCNMB1, CCDC91, MCAT, CALM1, CXADR, MAGEA11, ARHGDI1, NONO, HDAC2, CPSF7, FASN, PUF60, RASL11B, EPT1, CAMK1, KHDRBS2, COPS5, RAD23A, PHKG2, HERPUD1, ELAVL1, HSPA2, AGT, ELK1, POU4F1, SFXN1, BNIP3L, MDFI, MVK,</p> |                                                                                                                                                                                                                                                                                                                                                                                                                                                                                                                                                                                 |

|        |       |     |     |      |    |     |    |    |     |                                                                                                                                                                                                                                                                                                                                                                                                                                                                                                                                                                                                                                                                                                                                                                                       |
|--------|-------|-----|-----|------|----|-----|----|----|-----|---------------------------------------------------------------------------------------------------------------------------------------------------------------------------------------------------------------------------------------------------------------------------------------------------------------------------------------------------------------------------------------------------------------------------------------------------------------------------------------------------------------------------------------------------------------------------------------------------------------------------------------------------------------------------------------------------------------------------------------------------------------------------------------|
|        |       |     |     |      |    |     |    |    |     | <p>CUL4A, CHERP, CD177, ACTL6A, KRR1, CAND1, MRPS18B, GSK3B, ECD, HNRNPA1, CD81, DMRTB1, SUZ12, VPS72, ATN1, HBP1, MAPK1IP1L, CUL5, BARD1, FAMI131C, PIAS1, WWP1, SRF, KXD1, LILRA3, RNF183, TRIM5, MYL6, ELAVL4, WDR37, SMAD3, SUPT4H1, CFDP1, NBPF3, SSBP2, CDK12, NDUFA5, CETP, RAD21, TDRD3, MTMR9, ATXN3, MTCPI, BLZF1, TRIM37, FXR2, NDRG1, NPPB, MRP63, PDHX, ELAVL3, CEBPA, UBE2I, CDK2, CNST, HAX1, GATA1, BAD, RPS15A, RMND5B, SF3B4, SF1, UBC, RBPMS, PRRC2A, NSUN4, TULP2, POLR2A, NEDD8, PGLS, SAP30BP, EZH2, DCUN1D1, CUL1, FMNL1, TPGS2, RAB37, DHX9, ZNF165, TMSB4Y, RPL31, HDAC3, ITGA4</p>                                                                                                                                                                          |
| S72621 | EWSR1 | ERG | 214 | 1100 | 37 | 124 | 34 | 51 | 216 | <p>HNRNPUL1, C11orf16, ACTB, SMNDC1, YBX1, NDUFV1, CDK4, RIOK2, PRTFDC1, STK24, GNPDA1, WWP2, E2F8, RALYL, PRMT1, ERCC5, ITGA5, RNF168, MRPS9, GPBP1L1, NDUFB1, WBP4, USP7, RFX3, CUL3, CPSF6, ILK, SMN1, TONSL, RPS18, COPS6, EPAS1, CUEDC2, DYNLL2, MATK, CUL4B, TP53, PRPF8, EWSR1, RHOXF2, EP300, PRUNE2, SRSF5, HNRNPM, SERP2, SMAD4, XRCC6, MSC, SIRT7, HIST1H2BN, PLSCR1, FUS, DDX5, C19orf57, MST4, DFFA, RPLP0, TMEM126A, ERG, POLR3A, HLTF, PCBP1, ATP5A1, UBD, CD2BP2, EEF2K, TRAF3, HAS1, MBD3, HMGN4, HMGA1, YY1AP1, PTK2B, NTNG2, KEL, JUN, DNAJB3, TSG101, IRF3, CCDC7, MYO1F, CSNK1E, CDK9, CUL2, RPL7A, MNS1, C10orf12, SNRPC, GORASP2, MYOZ2, CSNK1A1, AR, KCNMB1, CCDC91, MCAT, DNAJA2, ETS2, CALM1, CXADR, DDX3X, MAGEA11, ARHGDI, NONO, XRCC4, HDAC2, CPSF7,</p> |

|        |       |         |    |     |    |     |    |    |    |                                                                                                                                                                                                                                                                                                                                                                                                                                                                                                                                                                                                                                                                                                                                                                                                               |
|--------|-------|---------|----|-----|----|-----|----|----|----|---------------------------------------------------------------------------------------------------------------------------------------------------------------------------------------------------------------------------------------------------------------------------------------------------------------------------------------------------------------------------------------------------------------------------------------------------------------------------------------------------------------------------------------------------------------------------------------------------------------------------------------------------------------------------------------------------------------------------------------------------------------------------------------------------------------|
|        |       |         |    |     |    |     |    |    |    | FASN, PUF60, HNRNPU, RASL11B, EPT1, HNRPDL, CAMK1, KHDRBS2, NME1, COPSS, RAD23A, PHKG2, HERPUD1, ELAVL1, HSPA2, AGT, ELK1, POU4F1, SFXN1, BNIP3L, MDFI, EIF2S1, MVK, CUL4A, CHERP, CD177, ACTL6A, KRR1, CAND1, MRPS18B, GSK3B, ECD, HNRNPA1, CD81, HSPA4, DMRTB1, SUZ12, VPS72, ATN1, HNRNPA2B1, HBP1, MAPK1IP1L, CUL5, HSPA8, BARD1, FAM131C, WWP1, DNAJA1, KXD1, LILRA3, RNF183, TRIM5, TRIM21, MYL6, ELAVL4, WDR37, XRCC5, SUPT4H1, CFDP1, NBPF3, SSBP2, CDK12, NDUFA5, CETP, RAD21, TDRD3, MTMR9, ATXN3, MTCP1, BLZF1, NEDD4, TRIM37, FXR2, NDRG1, NPPB, MRP63, PDHX, ELAVL3, CEBPA, CDK2, CNST, HAX1, BAD, TPM1, RPS15A, RMND5B, SF3B4, SF1, UBC, RBPMS, PRRC2A, NSUN4, TULP2, POLR2A, NEDD8, PRKDC, DNAJA4, PGLS, SAP30BP, EZH2, DCUN1D1, CUL1, TPGS2, RAB37, DHX9, ZNF165, TMSB4Y, RPL31, HDAC3, ITGA4 |
| L21756 | RUNX1 | MECOM   | 67 | 448 | 17 | 58  | 14 | 27 | 61 | HDAC1, YAP1, VDR, SMAD1, KAT6B, SOX2, RBM14, SIN3A, HDAC4, ELAVL1, KAT2B, CDK1, ETS1, TCF12, SPEN, HIPK2, UXT, PRMT1, FOS, AES, SMAD2, SIRT1, SMARCC1, SMAD5, PAX5, CFBF, MBD3, ELF4, CEBPB, NOTCH1, SMARCB1, TCF3, NCOR2, STUB1, TRAF6, MYC, KAT6A, EFNA2, TAL1, JUN, UBC, RUNX1T1, NR4A2, CTBP1, ELF2, CBFA2T2, FHL2, DNMT1, UBE2L6, SIAH1, EP300, C17orf79, MECOM, SMAD3, RUNX1, HDAC2, MYOD1, SUV39H1, CTBP2, SMAD4, HDAC3                                                                                                                                                                                                                                                                                                                                                                                |
| D13979 | RUNX1 | RUNX1T1 | 66 | 431 | 40 | 141 | 31 | 98 | 60 | VDR, YAP1, SMAD1, TAF9B, KAT6B, C19orf57, WBP11, SIN3A, SOX2, ELAVL1, CDK1, TCF12, UXT, HIPK2, PRMT1, FOS, UBE2E2, AES, SMAD2,                                                                                                                                                                                                                                                                                                                                                                                                                                                                                                                                                                                                                                                                                |

|          |       |        |    |     |    |     |    |    |    |                                                                                                                                                                                                                                                                                                                                                                                                                                                                                                   |
|----------|-------|--------|----|-----|----|-----|----|----|----|---------------------------------------------------------------------------------------------------------------------------------------------------------------------------------------------------------------------------------------------------------------------------------------------------------------------------------------------------------------------------------------------------------------------------------------------------------------------------------------------------|
|          |       |        |    |     |    |     |    |    |    | SMARCC1, SMAD5, PAX5, CBFB, OTUD4, ELF4, CEBPB, NECAB2, NOTCH1, SMARCB1, NCOR2, THRAP3, NEUROG1, STUB1, TRAF6, MYC, EFNA2, TAL1, JUN, ATN1, UBC, RBPJ, RUNX1T1, CTBP1, ELF2, CBFA2T2, FHL2, KPNB1, UBE2L6, ABI3, SIAH1, PCBD2, TAL2, C17orf79, SMAD3, RUNX1, MYOD1, HDAC2, CTBP2, CEP170P1, HDAC3                                                                                                                                                                                                 |
| EU093086 | RUNX1 | SH3D19 | 67 | 448 | 6  | 10  | 13 | 20 | 60 | HDAC1, YAP1, VDR, SH3YL1, SMAD1, KAT6B, SOX2, RBM14, SIN3A, ELAVL1, SH3D19, CDK1, ETS1, TCF12, SPEN, HIPK2, UXT, PRMT1, FOS, AES, SMAD2, SMARCC1, SMAD5, PAX5, CBFB, ELF4, CEBPB, NOTCH1, SMARCB1, TCF3, NCOR2, CDC42, STUB1, TRAF6, MYC, KAT6A, EFNA2, TAL1, JUN, UBC, RUNX1T1, NR4A2, CTBP1, NCOR1, ELF2, CBFA2T2, FHL2, DNMT1, UBE2L6, SIAH1, EP300, C17orf79, SMAD3, RUNX1, HDAC2, MYOD1, SUV39H1, CTBP2, HDAC3, GRB2                                                                         |
| AY633656 | PAX3  | NCOA1  | 16 | 36  | 70 | 507 | 14 | 46 | 71 | VDR, FOXA2, PPARG, COPS5, ESR2, NKX2-1, NCOA2, PRMT1, FOS, RXRA, NCOA1, GTF2B, PPARG, PPARGC1A, YWHAQ, STAT3, HNF4A, NR1I2, RARG, HIF1A, KANK2, RARB, MEOX2, TP53, SMARCE1, NCOA6, MEOX1, IPO13, TEAD2, TRIM21, PAX3, HDAC10, MSX1, TRIP4, HDAC1, DDX5, SNW1, STAT6, STAT5A, THRB, KAT2B, CARM1, PSMD4, ESRRG, NFKB1, RAD23B, BCL3, C16orf53, SRA1, UBE2L3, AHR, ANIB1, PGR, JUN, UBC, PPARA, CCND1, NR1H4, RORA, NR2F6, TEAD1, Ciita, NR4A1, NR3C1, NR5A1, POU3F2, AR, CXADR, SOX10, DAXX, DDX17 |
| BC008826 | PAX3  | FOXO1  | 16 | 36  | 31 | 131 | 15 | 40 | 32 | HDAC1, LRPPRC, SIRT2, IRF3, UBC, NLK, HOXA5, PSMD4, MEOX2, TXNRD1, AKT1, SIRT1, MEOX1, YWHAG, IPO13, RAD23B, CEBPB, TSC2, YWHAZ, POU3F2, AR, SMAD3, SRC, HOXA11, PAX3, SOX10, DAXX,                                                                                                                                                                                                                                                                                                               |

|          |        |        |    |    |    |     |    |    |    |                                                                                                                                                                                                                                                                                                                                                                                                                                                                                                                                                                                     |
|----------|--------|--------|----|----|----|-----|----|----|----|-------------------------------------------------------------------------------------------------------------------------------------------------------------------------------------------------------------------------------------------------------------------------------------------------------------------------------------------------------------------------------------------------------------------------------------------------------------------------------------------------------------------------------------------------------------------------------------|
|          |        |        |    |    |    |     |    |    |    | SMAD4, ATG7, MSX1, HDAC10, FOXO1                                                                                                                                                                                                                                                                                                                                                                                                                                                                                                                                                    |
| AF009227 | ODZ4   | NRG1   | 2  | 1  | 6  | 10  | 6  | 10 | 3  | CAND1, ODZ4, NRG1                                                                                                                                                                                                                                                                                                                                                                                                                                                                                                                                                                   |
| AF060929 | MLLT10 | PICALM | 11 | 20 | 27 | 91  | 12 | 15 | 27 | ATP6V1E1, FLOT1, DDIT3, UBC, SEC24D, ELAVL1, ILF3, MLLT10, MLLT3, NDEL1, SS18, LAMTOR3, PICALM, YEATS4, PELI2, EEF1A1, SIRT1, AFF1, CLTC, AP2A1, SMARCB1, ATP6V1F, DNM2, MLLT1, HIP1R, HNRPDL, ITGA4                                                                                                                                                                                                                                                                                                                                                                                |
| AF373587 | MLLT1  | MLL    | 26 | 83 | 72 | 383 | 3  | 2  | 84 | SET, SIN3A, ELL2, CSNK2A1, CBX4, PAF1, NCL, MAP3K5, CSNK2A2, SMARCB1, KAT8, CBX8, CTR9, BRD4, ACACA, WDR5, ASH2L, TCEB1, CTBP1, TP53, SBF1, E2F6, MLLT6, AFF1, DOT1L, PPP1R15A, H3F3A, WDR61, E2f2, RUNX1, SVIL, HIST1H1B, INS, CCNT1, SIRT7, HDAC1, CDC73, SIRT2, MEN1, SNW1, AFF4, BMI1, MTM1, HIST1H3A, ELL, RFX5, MLL, TAF6, HDAC9, SIRT1, HCFC1, CBF, HIST3H3, MED26, HIST1H4A, LEO1, CXXC1, KAT6A, BCOR, PPIE, CREBBP, HIST2H3C, UBC, ASB2, RBBP5, TCEB2, MLLT10, MLLT3, HCFC2, POLR2A, MLLT4, AVP, CDK9, PSIP1, RNF2, CHD1, E2F4, TOP1, RFXAP, HDAC2, MYB, HDAC7, MLLT1, OXT |
| DQ299936 | FRYL   | MLL    | 13 | 28 | 73 | 396 | 3  | 2  | 82 | SET, MMS19, SIN3A, DISC1, CBX4, PAF1, NCL, MAP3K5, ABCF1, NOTCH1, CSNK2A2, SMARCB1, KAT8, CBX8, CTR9, WDR5, ASH2L, TCEB1, CTBP1, GRK5, TP53, SBF1, E2F6, PELI2, AFF1, DOT1L, PPP1R15A, H3F3A, WDR61, E2f2, RUNX1, SVIL, INS, CCNT1, SIRT7, HDAC1, CDC73, SIRT2, MEN1, SNW1, AFF4, BMI1, MTM1, ELL, HIST1H3A, FRYL, MLL, TAF6, HDAC9, HOMER3, HCFC1, YWHAG, CBF, HIST3H3, BAK1, HIST1H4A, LEO1, CXXC1, KAT6A, PPIE, CREBBP, HIST2H3C, UBC, ASB2, TCEB2, RBBP5, MLLT3, HCFC2, POLR2A, MLLT4, AVP, CDK9, PSIP1, YWHAB, RNF2, E2F4, TOP1, HDAC2, MYB, MLLT1, HDAC7, OXT                 |
| DQ437655 | ELL    | MLL    | 18 | 53 | 72 | 388 | 3  | 2  | 81 | SET, SIN3A, CBX4, NARG2, PAF1,                                                                                                                                                                                                                                                                                                                                                                                                                                                                                                                                                      |

|          |      |     |    |     |    |     |   |   |     |                                                                                                                                                                                                                                                                                                                                                                                                                                                                                                                                                                                                                                                                                                                                                                                                                                                                                                                                                               |
|----------|------|-----|----|-----|----|-----|---|---|-----|---------------------------------------------------------------------------------------------------------------------------------------------------------------------------------------------------------------------------------------------------------------------------------------------------------------------------------------------------------------------------------------------------------------------------------------------------------------------------------------------------------------------------------------------------------------------------------------------------------------------------------------------------------------------------------------------------------------------------------------------------------------------------------------------------------------------------------------------------------------------------------------------------------------------------------------------------------------|
|          |      |     |    |     |    |     |   |   |     | <p>KIAA0947, NCL, MAP3K5, CSNK2A2, SMARCB1, KAT8, CBX8, CTR9, WDR5, ASH2L, TCEB1, MCM2, CTBP1, SBF1, TP53, E2F6, AFF1, DOT1L, PPP1R15A, TFPT, H3F3A, WDR61, E2f2, RUNX1, SVIL, INS, CCNT1, SIRT7, HDAC1, SIRT2, CDC73, MEN1, SNW1, AFF4, BMI1, MTM1, ELL, HIST1H3A, MLL, TAF6, ZHX1, HDAC9, HCFC1, CBF, HIST3H3, MED26, HIST1H4A, LEO1, EAF2, CXXC1, KAT6A, PPIE, CREBBP, HIST2H3C, UBC, ASB2, RBBP5, TCEB2, MLLT3, EAF1, HCFC2, POLR2A, MLLT4, AVP, CDK9, PSIP1, RNF2, USPL1, E2F4, TOP1, SNF8, HDAC2, MYB, MLLT1, HDAC7, OXT</p>                                                                                                                                                                                                                                                                                                                                                                                                                            |
| AF492830 | CDK6 | MLL | 97 | 360 | 73 | 396 | 5 | 4 | 163 | <p>SIN3A, DDIT3, CDK4, CDKN1B, SRSF2, SLBP, ANKRD12, KIF26B, ATF6B, PAF1, CSNK2A2, SMARCB1, CDKN2D, KAT8, PPARGC1A, MEF2D, CBX8, CTR9, WDR5, NFATC3, SRSF11, ASH2L, RBL2, TCEB1, TP53, CDK6, AFF1, LPIN1, UHRF2, PPP1R15A, KLF10, TPX2, FOXO3, H3F3A, WDR61, SRSF1, SVIL, ZFP36, INS, CCNT1, SIRT7, PPHLN1, SIRT2, MEN1, AFF4, MTM1, ELL, HIST1H3A, ZEB1, CDKN2A, TAF6, CBY1, ZNF174, SENP3, NIPBL, PML, CBF, POGZ, HIST1H4A, LEO1, TRA2A, MYC, CXXC1, KAT6A, CREBBP, SYNPO2, CDKN1A, RBBP5, TCEB2, HCFC2, MLLT3, EIF4ENIF1, CDK9, CCNA2, ATXN1, EBF4, SRSF7, HDAC2, ABI2, SOX10, MLLT1, OXT, SET, CASC3, ELAVL1, PRX, N4BP1, CLASRP, ELK1, CCND2, CBX4, NCL, MAP3K5, CDKN2C, CDC6, CDK7, MSL3, SNIP1, TRAK1, TCEB3B, CDK5R1, MCM2, CTBP1, ZSCAN1, SBF1, E2F6, FBXO7, HIST1H1A, SOX5, CCND3, DOT1L, ISL1, TJP2, E2f2, RUNX1, PPM1B, UCHL1, HDAC1, SSBP2, RB1, CDC73, SNW1, MZF1, BMI1, RBL1, ZNF335, MLL, MCM10, HSF1, VGLL4, HDAC9, SIRT1, HCFC1, TRA2B,</p> |



|          |     |       |    |     |     |     |    |    |     |                                                                                                                                                                                                                                                                                                                                                                                                                                                                                                                                                                                                                                                                                                        |
|----------|-----|-------|----|-----|-----|-----|----|----|-----|--------------------------------------------------------------------------------------------------------------------------------------------------------------------------------------------------------------------------------------------------------------------------------------------------------------------------------------------------------------------------------------------------------------------------------------------------------------------------------------------------------------------------------------------------------------------------------------------------------------------------------------------------------------------------------------------------------|
|          |     |       |    |     |     |     |    |    |     | HIST3H3, TFDP1, CDK2, CCNE1, PPIE, CDC37, HIST2H3C, ASB2, UBC, ZMYM3, HSP90AA1, ZNF101, PPP2CA, CCND1, FOXM1, POLR2A, MLLT4, AVP, EZH2, PSIP1, RNF2, E2F4, TOP1, srsf12, RBM23, NUMA1, MYB, DEDD2, HDAC7                                                                                                                                                                                                                                                                                                                                                                                                                                                                                               |
| DQ387206 | MLL | MLLT4 | 72 | 392 | 43  | 127 | 12 | 11 | 101 | SET, LMO2, SIN3A, PVRL3, CTNNA1, EPHA7, RRAS2, CBX4, PAF1, NCL, MAP3K5, SMARCB1, CSNK2A2, KAT8, YWHAQ, HNRNPA1, CBX8, ARRB2, PVRL1, CTR9, EPHB3, WDR5, EPHB6, ASH2L, TCEB1, TJP1, CTBP1, HRAS, TP53, SBF1, E2F6, AFF1, DOT1L, PPP1R15A, RAP1A, H3F3A, WDR61, E2f2, RUNX1, PVRL2, SVIL, INS, CCNT1, SIRT7, HDAC1, RAP1GAP, CDC73, SIRT2, MEN1, SNW1, AFF4, SSX2IP, BMI1, MTM1, ELL, HIST1H3A, NRAS, MLL, TAF6, PFN1, SMAD2, HDAC9, HCFC1, YWHAG, CBF, RIT1, HIST3H3, HIST1H4A, LEO1, KAT6A, CXXC1, PPIE, CREBBP, HIST2H3C, UBC, ASB2, TCEB2, RBBP5, MLLT3, HCFC2, POLR2A, MLLT4, AVP, CDK9, USP9X, PSIP1, YWHAB, RNF2, EPHB2, E2F4, TOP1, YWHAE, HDAC2, MYB, F11R, MLLT1, HDAC7, GRB2, ITGA4, RINI, OXT |
| L22179   | MLL | AFF1  | 72 | 386 | 26  | 95  | 22 | 36 | 68  | SET, SIN3A, ELL2, CBX4, PAF1, MAP3K5, SMARCB1, CSNK2A2, KAT8, CBX8, ASH2L, TCEB1, RELA, CTBP1, TP53, E2F6, AFF1, PPP1R15A, DDX6, H3F3A, WDR61, E2f2, RUNX1, INS, CCNT1, NPM1, SIRT7, HDAC1, CDC73, SIRT2, MEN1, SNW1, SIAH2, AFF4, MTM1, BMI1, HIST1H3A, ELL, MLL, CARM1, TAF6, HDAC9, CBF, HIST3H3, HIST1H4A, MED26, LEO1, PPIE, PCSK1, UBC, HIST2H3C, TCEB2, MLLT3, HCFC2, EAF1, AVP, CDK9, PSIP1, RNF2, HEXIM1, E2F4, SIAH1, TOP1, HDAC2, MYB, MLLT1, HDAC7, OXT                                                                                                                                                                                                                                    |
| AY187922 | MLL | EPS15 | 73 | 396 | 105 | 522 | 6  | 7  | 172 | ACTB, TRAF2, SIN3A, MAP4, IQGAP1, AGFG2, PAF1, HSPA5, VPRBP, TUBB,                                                                                                                                                                                                                                                                                                                                                                                                                                                                                                                                                                                                                                     |

|          |     |        |    |     |    |    |   |    |    |                                                                                                                                                                                                                                                                                                                                                                                                                                                                                                                                                                                                                                                                                                                                                                                                                                                                                                                                                                                                                                                                                                                                                                      |
|----------|-----|--------|----|-----|----|----|---|----|----|----------------------------------------------------------------------------------------------------------------------------------------------------------------------------------------------------------------------------------------------------------------------------------------------------------------------------------------------------------------------------------------------------------------------------------------------------------------------------------------------------------------------------------------------------------------------------------------------------------------------------------------------------------------------------------------------------------------------------------------------------------------------------------------------------------------------------------------------------------------------------------------------------------------------------------------------------------------------------------------------------------------------------------------------------------------------------------------------------------------------------------------------------------------------|
|          |     |        |    |     |    |    |   |    |    | <p>SMARCB1, CSNK2A2, KAT8, RNF11, CBX8, UBQLN1, CTR9, HIST4H4, NAGPA, WDR5, SKP2, ASH2L, TCEB1, KRT38, AP2M1, KRT14, TP53, AFF1, AGFG1, PPP1R15A, AP2A1, H3F3A, WDR61, KRT9, SVIL, KRT82, INS, APIB1, CCNT1, SIRT7, KRTAP9-3, KRT16, SIRT2, MEN1, AFF4, MTM1, SH3BP4, ELL, HIST1H3A, TGFB1, TAF6, UBE2E1, AP2S1, CBF6, KRT85, CD4, HIST1H4A, KRT33B, LEO1, CXXC1, KAT6A, KRT34, CREBBP, TCEB2, RBBP5, MLLT3, HCFC2, ABL1, KRT79, CDK9, CRK, UBE2H, PARK2, HSPA1B, KRT73, RAB11FIP2, UBE2D2, BMP2K, GJA1, NONO, HDAC2, PRDX1, CRKL, MLLT1, OXT, SET, RAD23A, LAPTM5, EPN1, ELAVL1, KRT3, CCT3, KRT37, AP2A2, CBX4, NECAP2, NCL, MAP3K5, STAM2, KRT6A, SPG20, SNAP91, DNMT2, KRT1, HGS, FCHO2, EPN3, HSPA8, CTBP1, EPS15, KRT36, USP8, SCAMP1, E2F6, SBF1, DOT1L, KRT10, PCCB, RUNX1, E2f2, OCLN, HSPA1L, KRT4, UBE2D3, HDAC1, CDC73, VSIG8, SNW1, BMI1, KRT86, MCCC2, MLL, CTNNB1, PSMD4, NEDD4, HDAC9, STON2, NUMB, HCFC1, REPS2, KRT35, HIST3H3, KRT5, SLC6A3, HSPA9, KRT75, TFAP2A, PPIE, KRT17, KRT83, UBE2D1, ASB2, UBC, HIST2H3C, C9orf86, POLR2A, KRT32, MLLT4, AVP, PSIP1, NECAP1, RNF2, CLINT1, AP2B1, UBQLN2, E2F4, TOP1, MYB, KRT2, HDAC7, ITGA4, GRB2</p> |
| AY187923 | MLL | MLLT10 | 73 | 396 | 11 | 20 | 9 | 10 | 71 | <p>SET, SIN3A, ELAVL1, DISC1, CBX4, PAF1, MAP3K5, SMARCB1, CSNK2A2, KAT8, CBX8, WDR5, ASH2L, TCEB1, CTBP1, NDEL1, TP53, SBF1, E2F6, AFF1, DOT1L, PPP1R15A, H3F3A, WDR61, E2f2, RUNX1, INS, CCNT1, SIRT7, HDAC1, CDC73, SIRT2, MEN1, SNW1, AFF4, MTM1, BMI1, HIST1H3A, ELL, MLL, SS18, TAF6, HDAC9, CBF6, HIST3H3,</p>                                                                                                                                                                                                                                                                                                                                                                                                                                                                                                                                                                                                                                                                                                                                                                                                                                                |

|          |     |        |    |     |    |    |    |    |    |                                                                                                                                                                                                                                                                                                                                                                                                                                                                                                                                                                                                                                                      |
|----------|-----|--------|----|-----|----|----|----|----|----|------------------------------------------------------------------------------------------------------------------------------------------------------------------------------------------------------------------------------------------------------------------------------------------------------------------------------------------------------------------------------------------------------------------------------------------------------------------------------------------------------------------------------------------------------------------------------------------------------------------------------------------------------|
|          |     |        |    |     |    |    |    |    |    | HIST1H4A, LEO1, KAT6A, CXXC1, PPIE, UBC, HIST2H3C, TCEB2, RBBP5, MLLT10, MLLT3, HCFC2, POLR2A, AVP, MLLT4, CDK9, YEATS4, PSIP1, RNF2, E2F4, TOP1, HDAC2, MYB, MLLT1, HDAC7, OXT                                                                                                                                                                                                                                                                                                                                                                                                                                                                      |
|          |     |        |    |     |    |    |    |    |    | SET, FLOT1, DDIT3, SIN3A, LAMTOR3, CBX4, PAF1, NCL, MAP3K5, SMARCB1, CSNK2A2, KAT8, CBX8, ATP6V1F, DNM2, CTR9, WDR5, SEC24D, ASH2L, TCEB1, CTBP1, CD55, PICALM, TP53, SBF1, E2F6, PELI2, CLTC, AFF1, DOT1L, PPP1R15A, AP2A1, H3F3A, WDR61, E2f2, RUNX1, SVIL, INS, CCNT1, SIRT7, HDAC1, CDC73, SIRT2, MEN1, SNW1, AFF4, PLCG1, BMII, MTM1, ELL, HIST1H3A, MLL, TAF6, EEF1A1, HDAC9, SIRT1, HCFC1, CBF, HIST3H3, SEC24C, HIST1H4A, LEO1, KAT6A, CXXC1, ATP6V1E1, PPIE, CREBBP, HIST2H3C, UBC, ASB2, TCEB2, RBBP5, ILF3, SH3GLB2, MLLT3, HCFC2, POLR2A, AVP, MLLT4, CDK9, PSIP1, RNF2, E2F4, TOP1, HDAC2, MYB, MLLT1, HDAC7, HIP1R, HNRPDL, ITGA4, OXT |
| AF477006 | MLL | PICALM | 73 | 396 | 27 | 91 | 8  | 9  | 92 |                                                                                                                                                                                                                                                                                                                                                                                                                                                                                                                                                                                                                                                      |
|          |     |        |    |     |    |    |    |    |    | SET, SUMO4, SIN3A, CBX4, PAF1, MAP3K5, GMPS, APRT, DDA1, SMARCB1, CSNK2A2, KAT8, USP7, CBX8, CUL3, SUMO2, ASH2L, TCEB1, TSTA3, CTBP1, TP53, SBF1, E2F6, COASY, AFF1, DOT1L, PPP1R15A, H3F3A, RCN1, ENO2, WDR61, E2f2, RUNX1, SVIL, INS, CCNT1, SIRT7, HDAC1, CDC73, SIRT2, MEN1, SNW1, AFF4, BABAM1, MTM1, BMII, AHCY, HIST1H3A, ELL, MLL, TCEAL1, TAF6, HDAC9, CBF, HIST3H3, HIST1H4A, LEO1, KAT6A, CXXC1, PSMD5, PPIE, MTAP, UBC, HIST2H3C, PNP, TCEB2, MLLT3, HCFC2, PPME1, POLR2A, AVP, CDK9, PSIP1, RNF2, E2F4, TOP1, HDAC2, MYB, MLLT1, HDAC7, OXT                                                                                             |
| AF297747 | MLL | GMPS   | 73 | 396 | 27 | 90 | 18 | 32 | 81 |                                                                                                                                                                                                                                                                                                                                                                                                                                                                                                                                                                                                                                                      |
| AF231997 | MLL | GAS7   | 73 | 396 | 21 | 30 | 8  | 9  | 87 | ABII, SET, SFPQ,                                                                                                                                                                                                                                                                                                                                                                                                                                                                                                                                                                                                                                     |

|          |     |        |    |     |    |     |   |   |     |                                                                                                                                                                                                                                                                                                                                                                                                                                                                                                                                                                                                                                                                                                                                                                                                                                                         |
|----------|-----|--------|----|-----|----|-----|---|---|-----|---------------------------------------------------------------------------------------------------------------------------------------------------------------------------------------------------------------------------------------------------------------------------------------------------------------------------------------------------------------------------------------------------------------------------------------------------------------------------------------------------------------------------------------------------------------------------------------------------------------------------------------------------------------------------------------------------------------------------------------------------------------------------------------------------------------------------------------------------------|
|          |     |        |    |     |    |     |   |   |     | <p>SIN3A, CBX4, PAF1, MAP3K5, SMARCB1, CSNK2A2, KAT8, CREB3L2, CBX8, WDR5, ASH2L, TCEB1, CTBP1, TP53, SBF1, E2F6, AFF1, DOT1L, PPP1R15A, KHDRBS1, H3F3A, WDR61, E2f2, RUNX1, GAPDH, SVIL, INS, CCNT1, SIRT7, DIAPH1, ATXN1L, HDAC1, CDC73, SIRT2, MEN1, SNW1, AFF4, SF3A1, MTM1, BMI1, ELL, HIST1H3A, RPLP0, MLL, TAF6, NCKAP1L, PACSIN1, HDAC9, GAS7, WASF2, CFBF, HIST3H3, HIST1H4A, LEO1, KAT6A, CXXC1, PPIE, SF1, UBC, HIST2H3C, TCEB2, RBBP5, MLLT3, HCFC2, APBB1IP, POLR2A, CYFIP1, AVP, MLLT4, CDK9, PSIP1, RNF2, FMNL1, WAS, E2F4, TOP1, HDAC2, NCKAP1, MYB, MLLT1, HDAC7, HNRNPU, CYFIP2, OXT</p>                                                                                                                                                                                                                                              |
|          |     |        |    |     |    |     |   |   |     | <p>VDR, SHC1, SET, ACTN4, MAPK7, SIN3A, ELAVL1, VCP, TXN, PSMA3, CBX4, TRIM3, PAF1, NCL, MAP3K5, SMARCB1, CSNK2A2, KAT8, CBX8, USP6NL, CD81, CTR9, HGS, WDR5, PDLIM1, SKP2, CAMK2A, ASH2L, UBTF, TCEB1, TJP1, ACTN2, CTBP1, ACTN1, KPNA2, SLC2A4, TP53, SBF1, E2F6, TRAF3IP1, STAT1, AFF1, DOT1L, UBASH3B, PPP1R15A, H3F3A, NOS3, MYOZ1, WDR61, E2f2, RUNX1, SVIL, INS, CAMK2B, CCNT1, SIRT7, HDAC1, CDC73, SIRT2, MEN1, SNW1, AFF4, BMI1, MTM1, ELL, HIST1H3A, MEF2A, CDKN2A, MLL, UCHL5, SF3A3, TAF6, GSN, HDAC9, UBD, ATXN7, HCFC1, CFBF, HIST3H3, INO80, HIST1H4A, ICAM1, LEO1, SACS, CXXC1, KAT6A, PPIE, ISG15, CREBBP, HIST2H3C, UBC, ASB2, TCEB2, RBBP5, MLLT3, HCFC2, POLR2A, AVP, MLLT4, COIL, CDK9, IGSF8, PSIP1, SLC9A3R2, RNF2, HDAC5, FMNL1, E2F4, MYOZ2, TOP1, POT1, GJA1, HDAC2, ESR1, MYB, RPS27, MLLT1, HDAC7, COL17A1, ITGA4, OXT</p> |
| FM165195 | MLL | ACTN4  | 73 | 396 | 57 | 205 | 6 | 8 | 121 |                                                                                                                                                                                                                                                                                                                                                                                                                                                                                                                                                                                                                                                                                                                                                                                                                                                         |
| DA624159 | TFG | GPR128 | 45 | 171 | 1  | 0   | 3 | 2 | 44  | <p>PIN1, PLSCR1, COPPS5, BABAMI, RAD21,</p>                                                                                                                                                                                                                                                                                                                                                                                                                                                                                                                                                                                                                                                                                                                                                                                                             |

|          |     |         |    |     |    |    |    |    |     |                                                                                                                                                                                                                                                                                                                                                                                                                                                                                                                                                                                                                                                                                                                                       |
|----------|-----|---------|----|-----|----|----|----|----|-----|---------------------------------------------------------------------------------------------------------------------------------------------------------------------------------------------------------------------------------------------------------------------------------------------------------------------------------------------------------------------------------------------------------------------------------------------------------------------------------------------------------------------------------------------------------------------------------------------------------------------------------------------------------------------------------------------------------------------------------------|
|          |     |         |    |     |    |    |    |    |     | MST4, RIOK2, STK24, MYOT, CUL4A, PALM2-AKAP2, UBD, ARL15, CAND1, C14orf1, EEF2K, TRAF3, GBP2, CUL3, CDK2, CRMP1, TP53RK, GPR128, COPS6, UBC, TSG101, BRE, KIAA1377, CUL5, NEDD8, PPP1CA, CDK9, CUL2, CUL4B, STAT5B, VRK1, STK4, CUL1, DCUN1D1, GPRASP1, TRIM25, EHBP1L1, TFG, GRB2                                                                                                                                                                                                                                                                                                                                                                                                                                                    |
| AJ295163 | FUS | ATF1    | 96 | 719 | 13 | 31 | 6  | 6  | 102 | ATF1, HNRNPA3, COPS5, PHKG2, IL7R, STK25, DYNC1H1, YBX1, RIOK2, STK24, CSNK2A1, PRMT1, CUL4A, UBL4A, TAF15, RXRA, CAND1, DGCR8, MRPS18B, CSNK2A2, WBP4, TCF3, CUL3, SUMO2, TP53RK, EIF6, COPS6, CAMK2A, RPLP1, LMNA, CUL5, RELA, SQSTM1, PSMB7, SUMO1, FOSL2, CUL4B, NKD2, EWSR1, GABPA, SRSF9, SARNP, OTUB1, CSNK2B, SUV39H1, TARDBP, TCF4, UPF1, RBMX, SPI1, SIRT7, ATXN1L, FUS, WHSC1, TP63, KIAA0182, TDRD3, LARS, KHDRBS3, EEF1A1, HNF1B, MDH1, UBD, TNIP1, USF2, EEF2K, MBD3, ZMYM2, SRA1, UBE2I, CDK2, RGFNF, ESRRA, CREBBP, SAFB2, SF1, SF3A2, UBC, ILF3, SRSF10, PIK3R2, RPS6KA1, CSNK1E, PA2G4, PTBP2, NEDD8, SRRM1, CDK9, CUL2, SAP30BP, STK4, CUL1, DCUN1D1, CSNK1A1, SUMO3, NONO, ESR1, THRA, HNRNPU, GRB2, ITGA4, CAMK1 |
| AJ549094 | FUS | CREB3L2 | 96 | 719 | 13 | 22 | 12 | 23 | 96  | RND1, HNRNPA3, COPS5, PHKG2, IL7R, ELAVL1, YBX1, RGS16, RIOK2, STK24, PRMT1, CUL4A, UBL4A, TAF15, RXRA, CAND1, DGCR8, MRPS18B, WBP4, TCF3, CREB3L2, CUL3, SUMO2, TP53RK, EIF6, COPS6, RPLP1, LMNA, CUL5, RELA, SQSTM1, CEP19, PSMB7, SUMO1, CUL4B, NKD2, GULP1, ZNF212, SRSF9, SARNP, OTUB1, SUV39H1, TARDBP, TCF4, UPF1, RBMX, SPI1, SIRT7, ATXN1L, FUS, TP63, KIAA0182, TDRD3, LARS, KHDRBS3, EEF1A1, GAS7, UBD, MDH1, TNIP1, USF2, EEF2K,                                                                                                                                                                                                                                                                                          |

|          |     |        |    |     |    |     |    |    |     |                                                                                                                                                                                                                                                                                                                                                                                                                                                                                                                                                                                                                                                                                                                                                                                                                                                                                   |
|----------|-----|--------|----|-----|----|-----|----|----|-----|-----------------------------------------------------------------------------------------------------------------------------------------------------------------------------------------------------------------------------------------------------------------------------------------------------------------------------------------------------------------------------------------------------------------------------------------------------------------------------------------------------------------------------------------------------------------------------------------------------------------------------------------------------------------------------------------------------------------------------------------------------------------------------------------------------------------------------------------------------------------------------------|
|          |     |        |    |     |    |     |    |    |     | <p>MBD3, PTP4A1, UBE2I, CDK2, RGNEF, ESRRA, SAFB2, SF1, SF3A2, UBC, ILF3, SRSF10, PIK3R2, RPS6KA1, CSNK1E, PA2G4, PTBP2, NEDD8, SRRM1, CDK9, CUL2, SAP30BP, STK4, CUL1, DCUN1D1, CSNK1A1, SUMO3, GCFC2, NONO, THRA, HNRNPU, GRB2, ITGA4, CAMK1</p>                                                                                                                                                                                                                                                                                                                                                                                                                                                                                                                                                                                                                                |
| S77574   | FUS | ERG    | 96 | 719 | 37 | 124 | 7  | 6  | 125 | <p>NME1, HNRNPA3, COPS5, ACTB, PHKG2, IL7R, STK25, DYNC1H1, YBX1, RIOK2, STK24, PRMT1, EIF2S1, CUL4A, UBL4A, TAF15, RXRA, CAND1, TUBB, DGCR8, MRPS18B, WBP4, TCF3, TP53RK, EIF6, RPS18, COPS6, RPLP1, HNRNPA2B1, LMNA, CUL5, RELA, HSPA8, SQSTM1, PSMB7, SUMO1, CUL4B, NKD2, DNAJA1, PRPF8, EWSR1, TRIM21, SRSF9, XRCC5, HNRNPM, SARNP, OTUB1, SUV39H1, TARDBP, TCF4, UPF1, RBMX, XRCC6, SPI1, SIRT7, ATXN1L, FUS, DDX5, WHSC1, TP63, KIAA0182, APP, TDRD3, RPLP0, ERG, LARS, PCBP1, KHDRBS3, NEDD4, EEF1A1, ATP5A1, MDH1, UBD, TNIP1, USF2, EEF2K, MBD3, ZMYM2, UBE2I, CDK2, RGNEF, TPM1, ESRRA, SAFB2, JUN, SF1, SF3A2, UBC, ILF3, SRSF10, PIK3R2, RPS6KA1, CSNK1E, PA2G4, PTBP2, NEDD8, SRRM1, PRKDC, CDK9, DNAJA4, CUL2, SAP30BP, RPL7A, STK4, CUL1, DCUN1D1, PARP1, CSNK1A1, SUMO3, AR, DNAJA2, ETS2, DDX3X, NONO, XRCC4, ESR1, THRA, HNRNPU, HNRPDL, GRB2, ITGA4, CAMK1</p> |
| AY764156 | NIN | PDGFRB | 7  | 14  | 42 | 175 | 10 | 14 | 39  | <p>SHC1, VAV1, ELAVL1, AURKA, KRTAP4-12, ETV6, VAV2, NEDD4, IRF8, SLA, MFGE8, PIK3R1, GSK3B, SNX4, SRC, AMOT, CAV3, VAV3, COPA, CAV1, UBC, NCK2, GRB14, HSP90AA1, PRKACA, SNX2, SNX1, SH2B2, CRK, ADRBK1, PDGCD6IP, PDGFRB, TNK2, RASA1, PTPN11, ERRF11, NIN, SLC9A3R1, GRB2</p>                                                                                                                                                                                                                                                                                                                                                                                                                                                                                                                                                                                                  |

|          |      |     |     |      |    |     |    |    |     |                                                                                                                                                                                                                                                                                                                                                                                                                                                                                                                                                                                                                                                                                                                                                                                                                                                |
|----------|------|-----|-----|------|----|-----|----|----|-----|------------------------------------------------------------------------------------------------------------------------------------------------------------------------------------------------------------------------------------------------------------------------------------------------------------------------------------------------------------------------------------------------------------------------------------------------------------------------------------------------------------------------------------------------------------------------------------------------------------------------------------------------------------------------------------------------------------------------------------------------------------------------------------------------------------------------------------------------|
|          |      |     |     |      |    |     |    |    |     | SHC1, TPM3, FKBP5, TPM4, HSPD1, SUMO4, HSP90AB1, ELAVL1, MAP3K1, MTIF2, GAK, PTN, MCM3, MAP3K5, JAK2, PIK3R1, MEP1B, HSPB1, EIF4A2, KYNU, STAT3, CUL3, IRS4, MAPK1, ILK, KRT74, PAN2, KRT18, MAPK8IP3, MYBPC3, TP73, SOCS1, THOC1, SOCS5, KXD1, PIK3CB, TFPT, MCC, TNK2, DYT10, MDC1, RAB35, PRKAA1, NEK2, ERRF1, TRAP1, CAP1, ZC3HC1, SEPT9, CDC123, MGEA5, PLCG1, RAD21, PLCB2, FKBP4, IKBKG, SEC23IP, CENPF, FBXO5, MAP3K4, EPHA1, MAGED2, HDAC8, SP1, IRS1, CDK2, SMC6, TPM1, SF3A2, UBC, CDK13, HSP90AA1, UBASH3A, ALK, MAP2K7, LRRK2, JAK3, RAD17, EPHB2, SHC3, EIF4B, PRDX1, FASN, PDX1, TPM2, IRF7, GRB2                                                                                                                                                                                                                               |
| AF362886 | TPM3 | ALK | 43  | 181  | 49 | 111 | 5  | 4  | 87  | RPL10, ELMO2, NSUN2, ANXA2, YBX1, PPP1CC, YY1, ENO1, UBL4A, PTN, TAF3, IMPG1, HSPB1, RYK, ARRB2, IRS4, ILK, MAP1B, SMN1, SLC25A3, PKM2, COPS6, EIF2AK2, MYBPC3, KDR, PSMD1, SUMO1, HNRNPH1, ADRBK1, TP53, MRPL18, MRPL10, AFF1, RNH1, DYT10, EP300, EEF2, COPB1, GRWD1, MC4R, OTUB1, CHCHD3, NOS2, GZMM, SIRT7, PSMC5, NUP98, C1QBP, FANCA, VASP, PLCB2, RARA, PRPF6, RPLP0, HNRNPA0, IKBKG, RCOR1, PCBP1, CTNBL1, ATP5A1, PML, CPSF3, USF2, TCP1, CD4, PRKCZ, ZYX, IRF1, LYAR, CDKN1A, CHCHD6, COPS2, LAMP2, PARK7, BOLA2, RPS5, MRPL38, RPS6KA1, CSNK1E, IPO9, PSMC4, TAB2, CUL2, JAK3, C20orf11, SNRPD1, SUMO3, JAK1, USP36, USP15, DNAJA2, NPM3, FASN, GNAI2, IRF7, SHC1, PRDX6, MYCBP, RBBP4, COPS5, PHKG2, ACY1, PRKAR1A, RPS6, Nup62, EIF2S1, CBX4, CUL4A, AKT1, MAP3K5, CAND1, JAK2, PIK3R1, HAND2, CPSF1, CDC14A, STAT3, NOP56, SDPR, |
| D45915   | NPM1 | ALK | 356 | 4334 | 49 | 111 | 17 | 26 | 382 |                                                                                                                                                                                                                                                                                                                                                                                                                                                                                                                                                                                                                                                                                                                                                                                                                                                |

MAPK1, HIVEP2,  
 ACACA, SUMO2,  
 IMPDH2, PYGB,  
 MAPK8IP3, CUL5,  
 SQSTM1, BARD1,  
 PPM1G, DNAJA1,  
 SOCS5, TNK2, TRIM21,  
 CSNK2B, ZC3HC1,  
 HDAC1, EIF5A, PADI4,  
 COPE, PLCG1, MDM2,  
 MRPL52, NAP1L4,  
 SIRT1, MRPL19,  
 GOLGA3, PPID, PP1L4,  
 DICER1, HIST3H3,  
 RPL5, MRPL46, EEF1D,  
 SREK1, EIF4A1,  
 UNC5C, CDK13,  
 PAPOLG, DZIP1,  
 LGALS1, ALK, DSTN,  
 HDAC5, DCUN1D1,  
 GRB7, PSMD12,  
 SLC25A5, EIF3E,  
 YWHAE, MRPL24,  
 IPO5, NUMA1, ESR1,  
 PDX1, SWAP70,  
 MRPL39, SURF4,  
 ARRB1, GRB2, RPL10L,  
 HSPD1, CENPA, PRKCI,  
 RIOK2, KCTD17,  
 MRPL12, TXN, MTIF2,  
 RPS28, CALU, GAK,  
 ICT1, HSPA5, LIMCH1,  
 JUNB, CDT1, CFL1,  
 EIF3I, YWHAQ, CBX8,  
 PTPN14, SRRT, CUL3,  
 XPO1, CPSF6, HNRNPR,  
 KRT74, KIF11, EPAS1,  
 RPLP1, COPG1, PHB,  
 RPS12, CCT2, SLAIN2,  
 FBXO6, MRPL50,  
 PIK3CB, PPP2R1A,  
 RAB35, HNRNPM,  
 SRSF1, GAPDH,  
 ERFF1, PSME3, NPM1,  
 PROS1, TCERG1,  
 RRP1B, EEF1B2, PTRF,  
 HIST1H3A, TUBB3,  
 CDKN2A, HIST1H1C,  
 MRPL28, DOCK4,  
 POLR2E, APEX1,  
 SENP3, TPR, EEF2K,  
 PPA1, MRPL11,  
 MRPS26, RPL6, TUFM,  
 AKAP11, RPS4X,  
 OSBPL1A, HMGA1,  
 NIPSNAP1, IRS1,  
 HIST1H4A, EIF3M,  
 SAMM50, ICAM1,  
 GOLGA2, KCTD2,  
 WDR26, RANBP6,  
 TXNDC12, TUBA1C,  
 STK38, KEAP1, H2AFX,  
 BAG2, MAP2K7,  
 NUP50, EPHB2, SHC3,  
 CSNK1A1, DDX3X,  
 HDAC2, TTC27,  
 HNRNPU, RPL24,  
 HOXA7, HSP90AB1,  
 PRDX4, MRPL54, VCP,  
 MAP3K1, MRPL49,  
 MRPS30, NUDCD1,  
 CSNK2A1, NCAFG,  
 SNRPF, FGD6,  
 CHCHD4, NCL, MEP1B,  
 EIF3H, RPL14, PC,  
 FBXO25, SPIN1, CSDA,  
 CD81, HSPA4, PAN2,  
 MRPL37, CTTN, EIF3G,  
 FANCC, KRT18,



|          |     |     |    |     |    |     |    |    |    |                                                                                                                                                                                                                                                                                                                                                                                                                                                                                                                                                                    |
|----------|-----|-----|----|-----|----|-----|----|----|----|--------------------------------------------------------------------------------------------------------------------------------------------------------------------------------------------------------------------------------------------------------------------------------------------------------------------------------------------------------------------------------------------------------------------------------------------------------------------------------------------------------------------------------------------------------------------|
|          |     |     |    |     |    |     |    |    |    | <p>KPNA1, RELA, TRRAP, PRKCA, GRN, SOCS1, H1FX, CDK5RAP3, NUDT21, DHX15, BANP, HIST1H1A, S100A11, CLTC, DOT1L, CBX2, TEX15, HIST2H2AC, PARD6B, PRKAA1, MRPL53, MID1, HIST2H2BE, TRIM28, OSBP, DDX21, ARHGAP5, PTBP1, TRMT61A, RB1, UQCRH, APP, KCTD5, PSMD4, CASKIN1, CENPF, EEF1G, EEF1A1, MAP3K4, MRPL44, EPHA1, HMGA2, DNAJC13, CDK2, SMC6, TFAP2A, CPSF2, CDC37, AGR2, UBC, PPP2CA, HSP90AA1, PA2G4, S100A10, UBASH3A, LLGL1, NAP1L1, DYRK2, IGSF8, RAD17, CUL1, TAB1, PARP1, FMNL1, SIAH1, TOP1, YWHAZ, HJURP, EIF4B, MRPL43, GZF1, SNRNP2, ARMCX3, ITGA4</p> |
| AF125093 | TFG | ALK | 45 | 171 | 49 | 111 | 21 | 26 | 73 | <p>SHC1, COPS5, HSPD1, MAP3K1, RIOK2, STK24, MYOT, CUL4A, PTN, MAP3K5, CAND1, JAK2, MEP1B, C14orf1, STAT3, CUL3, IRS4, MAPK1, KRT74, TP53RK, COPS6, KRT18, MAPK8IP3, KIAA1377, CUL5, SOCS1, CUL4B, STAT5B, VRK1, SOCS5, DYT10, RAB35, PRKAA1, ERFF1, EHBPI1L1, TFG, PLSR1, BABAM1, MST4, RAD21, IKBKG, PALM2-AKAP2, ARL15, UBD, EEF2K, MAP3K4, EPHA1, GBP2, IRS1, SMC6, CRMP1, TSG101, UBC, CDK13, BRE, HSP90AA1, UBASH3A, NEDD8, ALK, CDK9, PPP1CA, CUL2, MAP2K7, STK4, DCUN1D1, CUL1, RAD17, SHC3, EPHB2, GPRASP1, TRIM25, PDX1, IRF7</p>                        |
| AF295356 | MSN | ALK | 71 | 404 | 49 | 111 | 22 | 33 | 99 | <p>SHC1, HSPD1, ELAVL1, PAFAH1B2, MAP3K1, ASNS, STK24, MTIF2, FH, GAK, PTN, MAP3K5, ICAM2, HSPA5, JAK2, PIK3R1, MEP1B, VCL, TERF1, PDHA1, SELPLG, FASLG, PTMA, STAT3, CD81, IRS4, MAPK1, BID, ILK, KRT74, NCF4, RHOA, PAPSS1, ICAM3, KRT18, MAPK8IP3, TSC1, SOCS1, PPP1R2, TATDN1, DHX15, SOCS5, GSS, PIK3CB, TNK2, HADHA, DYT10,</p>                                                                                                                                                                                                                              |

|          |       |        |    |     |    |     |   |   |    |                                                                                                                                                                                                                                                                                                                                                                                                                                                                                                                                                                                                                                                            |
|----------|-------|--------|----|-----|----|-----|---|---|----|------------------------------------------------------------------------------------------------------------------------------------------------------------------------------------------------------------------------------------------------------------------------------------------------------------------------------------------------------------------------------------------------------------------------------------------------------------------------------------------------------------------------------------------------------------------------------------------------------------------------------------------------------------|
|          |       |        |    |     |    |     |   |   |    | RAB35, PRKAA1, ERRF1, SLC9A3R1, SIRT7, NAE1, ZC3HC1, SELL, PFAS, AHCY, PLCB2, NCF1, IKBKG, MAPK8, UBD, MAP3K4, EPHA1, DCPS, NSFL1C, PDIA4, IRS1, ICAM1, CDK2, SMC6, SPN, ISG15, UBC, CDK13, GTF3C4, HSP90AA1, MSN, ATIC, H2AFX, UBASH3A, ALK, S100A16, MAP2K7, IGSF8, JAK3, RAD17, EPHB2, SHC3, CDK11B, GINS3, FADD, ARHGDIA, EIF4B, PDX1, IRF7, GRB2, ITGA4, EZR                                                                                                                                                                                                                                                                                          |
| AF310722 | TPM4  | ALK    | 44 | 178 | 49 | 111 | 2 | 1 | 92 | SHC1, TRIP6, TPM3, TPM4, HSPD1, ILF2, MAP3K1, SRSF2, MTIF2, GAK, TXN2, PTN, AKT1, PSMA6, MAP3K5, JAK2, PIK3R1, MEP1B, STAT3, CORO1C, SRXN1, IRS4, MAPK1, ILK, KRT74, PAN2, KRT18, MAPK8IP3, G3BP1, MYBPC3, DBN1, PSMD1, SOCS1, SNRNP70, SOCS5, PIK3CB, TNK2, MYH9, DYT10, KIAA1598, ATF2, RAB35, PRKAA1, DCTN2, ERRF1, CAP1, ZC3HC1, TCERG1, PRKCDBP, PLCG1, PLCB2, IKBKG, CENPF, PACSIN1, TPM3P4, UBD, SIRT1, HNRNPK, MAP3K4, EPHA1, HDAC8, SP1, IRS1, CDK2, ZYX, PSMC2, SMC6, SULT1A1, SERPINH1, TPM1, TELO2, UBC, CDK13, ILF3, HSP90AA1, UBASH3A, ALK, MAP2K7, PCMT1, PSMD2, JAK3, RAD17, EPHB2, SHC3, EIF4B, CDH2, FASN, PDX1, TPM2, IRF7, GRB2, ARRB1 |
| DQ845346 | PAX5  | FOXP1  | 9  | 12  | 11 | 24  | 5 | 5 | 16 | SUMO2, RB1, PAX5, ELAVL1, GATAD2B, NCOR2, IL3RA, CTBP1, RUNX1, MTA1, FOXP4, MYB, ID3, DAXX, MYC, FOXP1                                                                                                                                                                                                                                                                                                                                                                                                                                                                                                                                                     |
| DQ845345 | PAX5  | ZNF521 | 9  | 12  | 6  | 9   | 2 | 1 | 14 | HDAC1, TBP, SMAD1, ZNF521, RB1, PAX5, ELAVL1, EP300, RUNX1, LYST, MYB, ID3, DAXX, SMAD4                                                                                                                                                                                                                                                                                                                                                                                                                                                                                                                                                                    |
| EF071958 | NUP98 | PHF23  | 36 | 140 | 3  | 3   | 2 | 1 | 37 | NXF1, HDAC1, HNRNPUL1, CDC73, NUP98, PRSS23, HDAC11, ARFGEF2, CSNK2A1, NUP133, PAF1, TPR, NFX1, RAE1, MOB1A, HDAC8, USP7, NUP88, TNPO1, PHF23, NUP107, CREBBP, QRICH2,                                                                                                                                                                                                                                                                                                                                                                                                                                                                                     |

|          |         |       |    |     |    |    |    |    |    |                                                                                                                                                                                                                                                                                                                                                                                                                                                                                                                                                                |
|----------|---------|-------|----|-----|----|----|----|----|----|----------------------------------------------------------------------------------------------------------------------------------------------------------------------------------------------------------------------------------------------------------------------------------------------------------------------------------------------------------------------------------------------------------------------------------------------------------------------------------------------------------------------------------------------------------------|
|          |         |       |    |     |    |    |    |    |    | UBC, RAPGEF3, LMNA, TNPO2, SUMO1, KPNB1, ECT2, PTTG1, EP300, PARP11, NUMA1, APC, SIRT7, NPM1                                                                                                                                                                                                                                                                                                                                                                                                                                                                   |
| AY662674 | NUP98   | PRRX2 | 36 | 140 | 1  | 0  | 5  | 5  | 33 | NXF1, HDAC1, HNRNPUL1, CDC73, NUP98, ARFGEF2, CSNK2A1, NUP133, PRRX2, PAF1, TPR, RAE1, MOB1A, HDAC8, USP7, NUP88, TNPO1, NUP107, QRICH2, UBC, RAPGEF3, LMNA, TNPO2, SUMO1, KPNB1, ECT2, PTTG1, EP300, PARP11, NUMA1, APC, NPM1, SIRT7                                                                                                                                                                                                                                                                                                                          |
| L03357   | PRKAR1A | RET   | 65 | 206 | 26 | 74 | 22 | 32 | 66 | SHC1, PLEKH2, SET, PRPF31, PRKAR1A, ELAVL1, DOK2, NUAKE1, GSK3B, AKAP4, MAPK6, DOK5, STAT3, CUL3, DOK4, PRKACA, ARPC3, NPRL2, PYCARD, C2orf88, AKAP1, RET, PJA2, PRKX, DOK6, NRTN, C2orf44, CAPN11, NPM1, HDAC1, MEN1, CBLC, SOX2, ARFGEF2, AKAP10, BAH1, UBE2M, CBS, IKBKG, SMAD2, HDAC9, UBD, GFRA1, AKAP11, CBL, OXSR1, SRC, CCNE1, DOK1, RFC2, PFDN5, UBC, SAFB, HSP90AA4P, SIRT5, HSP90AA1, PPP1CA, CRK, TAB1, MCRS1, ZBED1, GRB7, FRS2, GABARAPL1, ARFGEF1, SETD7                                                                                        |
| M16029   | TRIM27  | RET   | 90 | 408 | 26 | 74 | 28 | 43 | 88 | SHC1, TRIM31, UCHL3, PIAS4, DOK2, TUBGCP4, UBE2Z, USP2, CHUK, DOK5, TBK1, HR, MBD2, USP7, STAT3, UBE2A, DOK4, MBD4, RNF25, IKBKE, CUL5, MED21, PIAS1, TRIM32, TP53, DNMT1, CUL4B, UBE2L6, TRIM29, MAGEL2, TRIM21, RET, DOK6, TRAF5, NRTN, EID1, HDAC1, UBE2D3, RB1, TRIM43, UBE2O, BMI1, UBE2T, IKBKG, TRIM27, UCHL5, UBE2E2, UBE2E1, UBE2U, UBD, IKBKB, ATXN7, GFRA1, MBD3, UBE2J1, EPC1, UBE2W, SRC, FXD6, UBE2I, GTF2F1, DOK1, HDAC6, TAL1, UBE2D1, BEGAIN, UBC, PRAM1, SIRT5, HSP90AA1, MAGED4B, PIAS2, CRK, UBE2N, RBX1, UBE2H, GRB7, MCRS1, OTUB2, FRS2, |

|          |         |         |    |     |    |    |    |    |    |                                                                                                                                                                                                                                                                                                                                                                                                                                                                                                                                          |
|----------|---------|---------|----|-----|----|----|----|----|----|------------------------------------------------------------------------------------------------------------------------------------------------------------------------------------------------------------------------------------------------------------------------------------------------------------------------------------------------------------------------------------------------------------------------------------------------------------------------------------------------------------------------------------------|
|          |         |         |    |     |    |    |    |    |    | UBE2D2, EIF3E,<br>UBE2E3, MAGEA11,<br>DAXX, FBF1, UBE2D4,<br>MAGEF1                                                                                                                                                                                                                                                                                                                                                                                                                                                                      |
| X15786   | GOLGA5  | RET     | 4  | 3   | 26 | 74 | 6  | 5  | 25 | SHC1, DOK1, DOK4,<br>UBC, OCRL, SIRT5,<br>HSP90AA1, IKBKG,<br>DOK2, CRK, GRB7,<br>MCRS1, GFRA1,<br>GRB10, FRS2, CBL,<br>DOK5, RET, SRC,<br>DOK6, NRTN, STAT3,<br>RAB1A, GOLGA5,<br>GRB2                                                                                                                                                                                                                                                                                                                                                  |
| DQ104207 | HOOK3   | RET     | 10 | 28  | 26 | 74 | 5  | 4  | 31 | SHC1, SCFD1, DOK1,<br>DOK4, HOOK1, UBC,<br>VPS16, SIRT5,<br>HSP90AA1, HOOK2,<br>AKTIP, IKBKG,<br>HOOK3, VPS41, CRK,<br>DOK2, GRB7, MCRS1,<br>GFRA1, GRB10, FRS2,<br>CBL, DOK5, RET, SRC,<br>DOK6, NRTN, CUL3,<br>STAT3, FAM160A2,<br>GRB2                                                                                                                                                                                                                                                                                                |
| AJ303089 | RBM15   | MKL1    | 16 | 44  | 14 | 44 | 10 | 16 | 19 | SUMO2, TPM1, RRN3,<br>ACTB, UBC, SOX2,<br>KDM3A, UBE3C,<br>RBM15, SUMO1,<br>ALYREF, MAPK8, SRF,<br>MKL1, GSK3B, SMAD3,<br>SSRP1, HDAC3, SIRT7                                                                                                                                                                                                                                                                                                                                                                                            |
| X77754   | CCND1   | TACSTD2 | 76 | 455 | 4  | 3  | 14 | 26 | 66 | PPP1CB, NPDC1, PCNA,<br>NEUROD1, ELAVL1,<br>PPP1CC, CDK4, CDK1,<br>CDKN1B, ORC4,<br>PSMA6, MCM3,<br>ATP6V1B1, NCOA1,<br>USP2, MCM6, CRYAB,<br>PRMT5, XPO1, STAT3,<br>HERC5, MAPK1,<br>RABEP1, RBL2, MCM2,<br>DBC1, HSPA8, TP73,<br>FBXO4, CDK6, AKAP8,<br>UHRF2, ATF2, CARD11,<br>HDAC1, RB1, THRB,<br>KAT2B, CDKN2A,<br>MCM10, TACSTD2,<br>FBXO5, SKP1, SP1,<br>ITLN1, CDK2, RFC1,<br>CDKN1A, CDK5, UBC,<br>LPL, CCND1, CUL7,<br>RBX1, CUL1, FBXO31,<br>TSC2, AR, CDKN1C,<br>MCM7, HDAC2,<br>MAPK11, SIRT3,<br>HDAC3, CCNDBP1,<br>CAMK1 |
| Y08643   | COL1A1  | PDGFB   | 27 | 50  | 17 | 23 | 7  | 7  | 35 | MMP2, ELAVL1,<br>BRCA1, SPARC, TXN,<br>IGFBP3, MDFI, ITGA2,<br>COL5A1, PDGFA,<br>ACHE, PDGFRA,<br>COL7A1, COL1A2,<br>COL3A1, COL4A1,<br>Pkd1, VWF, PDAP1,<br>THBS1, ITGB1, PRELP,<br>UBC, CAPN1, BARD1,<br>MAG, COL1A1, PDGFB,<br>COL6A1, C12orf57,<br>NRP1, RNH1, COL2A1,<br>LYVE1, ADIPOQ                                                                                                                                                                                                                                              |
| EU314929 | TMPRSS2 | ETV5    | 1  | 0   | 17 | 30 | 3  | 2  | 16 | AMH, SUMO2, SEZ6L2,<br>CCR5, UBC, CISH,<br>HDAC11, ELAVL1,<br>ETV5, AR, SLC22A2,<br>APP, TMPRSS2,                                                                                                                                                                                                                                                                                                                                                                                                                                        |

|          |         |      |   |   |    |     |   |   |    |                                                                                                                                                                                                                                                                               |
|----------|---------|------|---|---|----|-----|---|---|----|-------------------------------------------------------------------------------------------------------------------------------------------------------------------------------------------------------------------------------------------------------------------------------|
|          |         |      |   |   |    |     |   |   |    | CYP3A5, DHRS7,<br>HOXD9                                                                                                                                                                                                                                                       |
| EU432099 | TMPRSS2 | ERG  | 1 | 0 | 37 | 124 | 6 | 6 | 33 | NME1, DDX5, ACTB,<br>RPLP0, ERG, PCBP1,<br>EIF2S1, NEDD4,<br>ATP5A1, HSPA4, TPM1,<br>JUN, RPS18, UBC,<br>HNRNPA2B1, HSPA8,<br>PRKDC, DNAJA4,<br>PRPF8, DNAJA1,<br>RPL7A, AR, TRIM21,<br>DNAJA2, ETS2,<br>HNRNPM, TMPRSS2,<br>XRCC5, DDX3X,<br>XRCC4, HNRNPU,<br>XRCC6, HNRPDL |
| EU236946 | SLC34A2 | ROS1 | 1 | 0 | 6  | 8   | 2 | 1 | 6  | PTPN6, ROS1, IKBKG,<br>VAV3, PTPN11,<br>SLC34A2                                                                                                                                                                                                                               |

**Table S10: Fusions incorporating parental proteins which are interactors, change their PPI networks and reduce the number of interactors in the fusion networks w.r.t. networks of parental proteins**

| gene1    | gene2       | mutations                                | Domains of gene1                  | Domains of gene2                                      | interactions |
|----------|-------------|------------------------------------------|-----------------------------------|-------------------------------------------------------|--------------|
| CHN2     | INSR        | t(7;19)(p15.2;p13.2)                     | C1,RhoGAP,SH2                     | FU,TyrKc,TM,fn3,Recep_L_domain                        | 0            |
| CMKLR1   | HNF1A       | t(12;12)(q23;q24)                        | TM                                | HOX                                                   | 0            |
| SSX1     | SYT4        | t(X;18)(p11.2;q11.2)                     | KRAB                              | TM,C2                                                 | 0            |
| SSX1     | SS18L1      | t(X;20)(p11.2;q13.3)                     | KRAB                              | .                                                     | 0            |
| PAFAH1B2 | IGH@        | t(11;14)(q32;q23)                        | .                                 | .                                                     | 0            |
| FOXP1    | ABL1        | t(3;9)(p13;q34)                          | FH,zf-C2H2                        | FABD,SH3,TyrKc,SH2                                    | 0            |
| FOXP1    | ETV1        | t(3;7)(p14.1;p21.3)                      | FH,zf-C2H2                        | Ets                                                   | 0            |
| CTNNA3   | ARHGAP21    | t(10;10)(p12;q21)                        | .                                 | PDZ,PH,RhoGAP                                         | 0            |
| BCR      | JAK2        | t(9;22)(p24;q11)                         | PH,Bcr-Abl_Oligo,RhoGAP,RhoGEF,C2 | B41,STYKc,TyrKc,SH2                                   | 0            |
| BCR      | PDGFRA      | t(4;22)(q12;q11)                         | PH,Bcr-Abl_Oligo,RhoGAP,RhoGEF,C2 | IG_like,IGc2,TyrKc,TM,ig                              | 0            |
| EIF4G3   | LRRC8D      | t(1;1)(p22;p36)                          | eIF5C,COILS,MA3,MIF4G             | LRR,LRR_TYP,TM                                        | 0            |
| DCAF7    | PRR11       | t(17;17)(q22;q23)                        | WD40                              | .                                                     | 0            |
| TPM3     | PDGFRB      | t(1;5)(q21;q32),t(1;5)(q21;q33)          | TM                                | IGc2,TyrKc,TM,ig                                      | 0            |
| C18orf45 | HM13        | t(18;20)(q11;q15)                        | TM                                | PSN,TM                                                | 0            |
| DEPDC1B  | ELOVL7      | t(5;5)(q12;q12)                          | DEP,RhoGAP                        | TM                                                    | 0            |
| FRYL     | SH2D1A      | t(X;4)(q25;p12)                          | COILS                             | SH2                                                   | 0            |
| DHX35    | ITCH        | t(20;20)(q11;q12)                        | DEXDc,HELICc,HA2                  | HECTc,C2,WW                                           | 0            |
| DIRC3    | HSPBAP1     | t(2;3)(q35;q21)                          | .                                 | JmjC                                                  | 0            |
| RBM6     | CSF1R       | t(3;5)(p21;q33)                          | RRM,G-patch,zf-C2H2               | IG_like,IGc2,TyrKc,TM,ig                              | 0            |
| DLEU2    | PSPC1       | t(13;13)(q12;q14)                        | .                                 | RRM,COILS                                             | 0            |
| BCAS3    | HOXB9       | t(17;17)(q21;q23)                        | WD40                              | HOX                                                   | 0            |
| BCAS3    | ARHGAP15    | t(2;17)(q22;q23)                         | WD40                              | PH,RhoGAP                                             | 0            |
| RPN1     | EV11        | t(3;3)(q21;q26)                          | TM,COILS                          | zf-C2H2                                               | 0            |
| RPN1     | PRDM16      | t(1;3)(p36;q21)                          | TM,COILS                          | SET,zf-C2H2                                           | 0            |
| PPFIBP1  | ALK         | t(2;12)(p23;p11)                         | COILS,SAM_1                       | LDLa,TyrKc,MAM,Pkinase_Tyr                            | 0            |
| RARA     | PKIA        | t(8;17)(q21;q21)                         | HOLI,TM,zf-C4                     | .                                                     | 0            |
| RARA     | MLL         | t(5;11)(q31;q23)                         | HOLI,TM,zf-C4                     | BROMO,PostSET,COILS,FYRC,FYRN,AT_hook,PHD,SET,zf-CXXC | 0            |
| MYC      | IGH@        | t(8;14)(q24.21;q32.33)                   | HLH                               | .                                                     | 0            |
| MYC      | KRT18P6     | t(8;14)(q24;q11)                         | HLH                               | .                                                     | 0            |
| MYC      | BCL7A       | t(8;14;12)(q24;q32;q24)                  | HLH                               | .                                                     | 0            |
| MYC      | ZBTB5       | t(8;9)(q24;p13)                          | HLH                               | BTB,zf-C2H2                                           | 0            |
| MYC      | ZCCHC7      | t(8;9)(q24;p13)                          | HLH                               | zf-C2HC                                               | 0            |
| EDA      | NM_203447.1 | t(X;9)(q13;p24)                          | TM,TNF                            | .                                                     | 0            |
| EXOC4    | PTEN        | t(7;10)(q33;q23)                         | .                                 | DSPc,Y_phosphatase                                    | 0            |
| EPCAM    | DLEC1       | t(2;3)(p21;p22)                          | TY,TM,Thyroglobulin_1             | .                                                     | 0            |
| ETV6     | MECOM       | t(3;12)(q26;p13)                         | Ets,SAM_PNT                       | .                                                     | 0            |
| ETV6     | ITPR2       | t(12;12)(p11;p13)                        | Ets,SAM_PNT                       | TM,COILS,MIR                                          | 0            |
| ETV6     | INO80D      | t(2;12)(q33;p13)                         | Ets,SAM_PNT                       | .                                                     | 0            |
| ETV6     | NCOA2       | t(8;12)(q13;p13)                         | Ets,SAM_PNT                       | PAC,DUF1518,HLH,Nuc_rec_co-act,PAS,Src-1              | 0            |
| ETV6     | ARNT        | t(1;12)(q21;p13)                         | Ets,SAM_PNT                       | PAC,HLH,PAS                                           | 0            |
| ETV6     | JAK2        | t(9;12)(p24;p13)                         | Ets,SAM_PNT                       | B41,STYKc,TyrKc,SH2                                   | 0            |
| ETV6     | EV11        | t(3;12)(q26;p13)                         | Ets,SAM_PNT                       | zf-C2H2                                               | 0            |
| ETV6     | NKAIN2      | t(6;12)(q23;p13)                         | Ets,SAM_PNT                       | TM                                                    | 0            |
| ETV6     | GOT1        | t(10;12)(q24;p13)                        | Ets,SAM_PNT                       | Aminotran_1_2                                         | 0            |
| ETV6     | ABL2        | t(1;12)(q25;p13),t(1;10;12)(q25;p13;p13) | Ets,SAM_PNT                       | FABD,SH3,TyrKc,SH2                                    | 0            |
| ETV6     | PER1        | t(12;17)(p13;p13.1)                      | Ets,SAM_PNT                       | PAC,PAS                                               | 0            |
| ETV6     | FLT3        | t(12;13)(p13;q12)                        | Ets,SAM_PNT                       | IG_like,TyrKc,TM,ig                                   | 0            |
| ETV6     | SYK         | t(9;12)(q22;p12)                         | Ets,SAM_PNT                       | TyrKc,SH2                                             | 0            |
| ETV6     | BAZ2A       | t(12;12)(p13;q13)                        | Ets,SAM_PNT                       | BROMO,COILS,DDT,AT_hook,MBD                           | 0            |

|          |          |                                          |                                       |                                                       |   |
|----------|----------|------------------------------------------|---------------------------------------|-------------------------------------------------------|---|
| ETV6     | MDS2     | t(1;12)(p36;p13)                         | Ets,SAM_PNT                           | .,PHD                                                 | 0 |
| ETV6     | FGFR3    | t(4;12)(p16;p13)                         | Ets,SAM_PNT                           | IG_like,IGc2,TyrKc,TM,ig,Pkinase,Pkinase_Tyr          | 0 |
| ETV6     | CDX2     | t(12;13)(p13;q12)                        | Ets,SAM_PNT                           | HOX                                                   | 0 |
| ETV6     | MDS1     | t(3;12)(q26;p13)                         | Ets,SAM_PNT                           | SET,zf-C2H2                                           | 0 |
| ETV6     | PRDM16   | t(1;12)(p36;p13)                         | Ets,SAM_PNT                           | SET,zf-C2H2                                           | 0 |
| ETV6     | FRK      | t(6;12)(q22;p13)                         | Ets,SAM_PNT                           | SH3,TyrKc,SH2                                         | 0 |
| ETV6     | STL      | t(6;12)(q22;p13)                         | Ets,SAM_PNT                           | .                                                     | 0 |
| ETV6     | PDGFRA   | t(4;12)(q12;p13)                         | Ets,SAM_PNT                           | IG_like,IGc2,TyrKc,TM,ig                              | 0 |
| ESRRA    | C11orf20 | t(11;11)(q13;q13)                        | HOLI,zf-C4                            | .                                                     | 0 |
| ERBB2    | PGAP3    | t(17;17)(q12;q12)                        | FU,TyrKc,TM,Recep_L_domain            | TM                                                    | 0 |
| NDE1     | PDGFRB   | t(5;16)(q32;p13),t(5;16)(q33;p13)        | .                                     | IGc2,TyrKc,TM,ig                                      | 0 |
| CAPNS1   | WDR62    | t(19;19)(q13;q13)                        | EFh                                   | WD40                                                  | 0 |
| MECOM    | ETV6     | t(3;12)(q26;q13)                         | .                                     | Ets,SAM_PNT                                           | 0 |
| CDKN1A   | CD9      | t(6;12)(p21;p13)                         | .                                     | TM                                                    | 0 |
| FBXO25   | BET1L    | t(8;11)(p23;p15)                         | .                                     | TM                                                    | 0 |
| DEK      | NUP214   | t(6;9)(p22;q34)                          | COILS,DEK_C,SAP                       | WD40                                                  | 0 |
| FKBP5    | ERG      | t(6;21)(p21;q22)                         | FKBP_C                                | Ets,SAM_PNT                                           | 0 |
| KTN1     | RET      | t(10;14)(q11.2;q22.1)                    | TM,COILS                              | CA,TyrKc,TM                                           | 0 |
| ARID1A   | MAST2    | t(1;1)(p34;p36)                          | BRIGHT,ARID                           | S_TK_X,S_TKc,DUF1908,PDZ                              | 0 |
| MEF2C    | MLL      | t(5;11)(q14;q23)                         | MADS                                  | BROMO,PostSET,COILS,FYRC,FYRN,AT_hook,PHD,SET,zf-CXXC | 0 |
| RYK      | ATP5O    | t(3;21)(q22;q22)                         | TyrKc,TM,WIF                          | .                                                     | 0 |
| Lamp1    | MCF2L    | t(13;13)(q34;q34)                        | TM                                    | SEC14,SH3,SPEC,COILS,PH,RhoGEF                        | 0 |
| GRHPR    | BCL6     | t(3;9)(q27;p13)                          | 2-Hacid_dh,2-Hacid_dh_C,NAD_binding_2 | BTB,zf-C2H2                                           | 0 |
| GRPR     | SDC2     | t(X;8)(p22.2;q23)                        | TM                                    | 4.1m,TM                                               | 0 |
| Nap111   | MLLT10   | t(10;12)(p12;q21)                        | COILS                                 | TM,COILS,PHD                                          | 0 |
| SNX2     | ABL1     | t(5;9)(q23;q34),t(3;9)(p14;q34)          | PX,Vps5                               | FABD,SH3,TyrKc,SH2                                    | 0 |
| MYO18A   | FGFR1    | t(8;17)(p11;q23)                         | MYSs,COILS,IQ,PDZ                     | IG_like,IGc2,TyrKc,TM                                 | 0 |
| MYO18A   | PDGFRB   | t(5;17)(q32;q11)                         | MYSs,COILS,IQ,PDZ                     | IGc2,TyrKc,TM,ig                                      | 0 |
| C6orf204 | PDGFRB   | t(5;6)(q32;q23)                          | COILS                                 | IGc2,TyrKc,TM,ig                                      | 0 |
| TCF3     | TFPT     | t(19;19)(p13;q13)                        | COILS,HLH                             | .                                                     | 0 |
| TCF3     | NOP2     | t(12;19)(p13.3;p13.3)                    | COILS,HLH                             | .                                                     | 0 |
| TCF3     | HLF      | t(17;19)(q22;p13)                        | COILS,HLH                             | BRLZ                                                  | 0 |
| ERBB3    | CRADD    | t(12;12)(q13;q22)                        | FU,TyrKc,TM,Recep_L_domain            | Death,CARD                                            | 0 |
| RABEP1   | PDGFRB   | t(5;17)(q32;p13),t(5;17)(q33;p13)        | Rab5-bind                             | IGc2,TyrKc,TM,ig                                      | 0 |
| HSPE1    | MOB4     | t(2;2)(q33;q33)                          | Cpn10                                 | .                                                     | 0 |
| SMG6     | ERG      | t(17;21)(p13.1;q22.3)                    | PINc,COILS,EST1                       | Ets,SAM_PNT                                           | 0 |
| IGH@     | CNN3     | t(1;14)(p21;q32)                         | .                                     | CH                                                    | 0 |
| IGH@     | PAFAH1B2 | t(11;14)(q23;q32)                        | .                                     | .                                                     | 0 |
| IGH@     | FOXP1    | t(3;14)(p13;q32)                         | .                                     | FH,zf-C2H2                                            | 0 |
| IGH@     | MYC      | t(8;14)(q24;q32),t(8;14;18)(q24;q32;q21) | .                                     | HLH                                                   | 0 |
| IGH@     | ETV6     | t(12;14)(p13;q32)                        | .                                     | Ets,SAM_PNT                                           | 0 |
| IGH@     | BCL6     | t(3;14)(q27;q32)                         | .                                     | BTB,zf-C2H2                                           | 0 |
| IGH@     | MAFB     | t(14;20)(q32;q12)                        | .                                     | BRLZ                                                  | 0 |
| IGH@     | MIR125B1 | t(11;14)(q24;q32)                        | .                                     | .                                                     | 0 |
| IGH@     | CDK6     | t(7;14)(q21;q32)                         | .                                     | S_TKc                                                 | 0 |
| IGH@     | CCND3    | t(6;14)(p21;q32)                         | .                                     | Cyclin,Cyclin_C                                       | 0 |
| IGH@     | MYCN     | t(2;14)(p24;q32)                         | .                                     | HLH                                                   | 0 |
| IGH@     | NBEAP1   | t(14;15)(q32;q11-13)                     | .                                     | .                                                     | 0 |

**Table S11: Domain pairs, number of appearances and their frequencies (from the DDCOS table)**

| <b>Domain name</b> | <b>A number of appearances of domains in interactors</b> | <b>frequency(Pi)</b> |
|--------------------|----------------------------------------------------------|----------------------|
| 14-3-3             | 8                                                        | 0.000536229          |
| 2-Hacid_dh         | 4                                                        | 0.000268114          |
| 2-Hacid_dh_C       | 5                                                        | 0.000335143          |
| 2-oxoacid_dh       | 4                                                        | 0.000268114          |
| 2OG-FeII_Oxy       | 5                                                        | 0.000335143          |
| 3_5_exonuc         | 5                                                        | 0.000335143          |
| 3HCDH              | 4                                                        | 0.000268114          |
| 3HCDH_N            | 4                                                        | 0.000268114          |
| 4_1_CTD            | 4                                                        | 0.000268114          |
| 4HBT               | 8                                                        | 0.000536229          |
| XPGI               | 4                                                        | 0.000268114          |
| 5_nucleotid_C      | 1                                                        | 6.70E-05             |
| PGAM               | 15                                                       | 0.001005429          |
| 6PGD               | 1                                                        | 6.70E-05             |
| A2M_comp           | 13                                                       | 0.000871372          |
| A_deaminase        | 11                                                       | 0.000737315          |
| AAA                | 144                                                      | 0.009652121          |
| AARP2CN            | 3                                                        | 0.000201086          |
| ABC_tran           | 4                                                        | 0.000268114          |
| Abhydrolase        | 57                                                       | 0.003820631          |
| ABM                | 3                                                        | 0.000201086          |
| ACBP               | 7                                                        | 0.0004692            |
| PlsC               | 36                                                       | 0.00241303           |
| AChE_tetra         | 2                                                        | 0.000134057          |
| Aconitase_C        | 3                                                        | 0.000201086          |
| ACP_syn_III_C      | 1                                                        | 6.70E-05             |
| ACT                | 3                                                        | 0.000201086          |
| Actin              | 25                                                       | 0.001675716          |
| Activin_recp       | 12                                                       | 0.000804343          |
| Acyl_CoA_thio      | 1                                                        | 6.70E-05             |
| Adenylsucc_synt    | 2                                                        | 0.000134057          |
| ADH_N              | 16                                                       | 0.001072458          |
| adh_short          | 62                                                       | 0.004155775          |
| Adhes-Ig_like      | 1                                                        | 6.70E-05             |
| ADK                | 9                                                        | 0.000603258          |
| ADK_lid            | 2                                                        | 0.000134057          |
| AdoHcyase          | 3                                                        | 0.000201086          |
| AdoHcyase_NAD      | 3                                                        | 0.000201086          |
| Agenet             | 4                                                        | 0.000268114          |
| Agouti             | 2                                                        | 0.000134057          |
| AGTRAP             | 1                                                        | 6.70E-05             |
| Aha1_N             | 2                                                        | 0.000134057          |
| AhpC-TSA           | 13                                                       | 0.000871372          |
| AHSP               | 1                                                        | 6.70E-05             |
| AICARFT_IMPCHas    | 1                                                        | 6.70E-05             |
| AIRC               | 1                                                        | 6.70E-05             |
| AIRS               | 4                                                        | 0.000268114          |
| AKAP_110           | 2                                                        | 0.000134057          |
| Ala_racemase_N     | 1                                                        | 6.70E-05             |
| ALAD               | 1                                                        | 6.70E-05             |
| AlaDh_PNT_C        | 4                                                        | 0.000268114          |
| Ald_Xan_dh_C2      | 2                                                        | 0.000134057          |
| Aldo_ket_red       | 18                                                       | 0.001206515          |
| Aldolase_II        | 4                                                        | 0.000268114          |
| Alpha-2-MRAP_C     | 1                                                        | 6.70E-05             |
| Alpha-amylase      | 4                                                        | 0.000268114          |
| Alpha-mann_mid     | 4                                                        | 0.000268114          |
| Alpha_adaptinC2    | 9                                                        | 0.000603258          |
| Alpha_kinase       | 6                                                        | 0.000402172          |
| Alpha_L_fucos      | 2                                                        | 0.000134057          |
| Amelin             | 1                                                        | 6.70E-05             |
| Amelogenin         | 2                                                        | 0.000134057          |
| Amidohydro_1       | 11                                                       | 0.000737315          |
| Amino_oxidase      | 12                                                       | 0.000804343          |
| Aminotran_5        | 35                                                       | 0.002346002          |
| AMOP               | 4                                                        | 0.000268114          |
| AMP_N              | 2                                                        | 0.000134057          |



|                 |     |             |
|-----------------|-----|-------------|
| AMPKBI          | 2   | 0.000134057 |
| ANATO           | 6   | 0.000402172 |
| Ank             | 237 | 0.015885783 |
| ANTH            | 1   | 6.70E-05    |
| Anticodon_1     | 6   | 0.000402172 |
| AP_endonuc_2    | 1   | 6.70E-05    |
| APC2            | 1   | 6.70E-05    |
| APOBEC_C        | 12  | 0.000804343 |
| Apolipoprotein  | 4   | 0.000268114 |
| APS_kinase      | 2   | 0.000134057 |
| AraC_binding    | 1   | 6.70E-05    |
| Arfaptn         | 5   | 0.000335143 |
| ArfGap          | 24  | 0.001608687 |
| Arg_tRNA_synt_N | 1   | 6.70E-05    |
| Arginase        | 3   | 0.000201086 |
| ARID            | 15  | 0.001005429 |
| Arm             | 29  | 0.00194383  |
| Arrestin_C      | 11  | 0.000737315 |
| ASCH            | 2   | 0.000134057 |
| Asn_synthase    | 3   | 0.000201086 |
| Asparaginase    | 4   | 0.000268114 |
| AT_hook         | 29  | 0.00194383  |
| ATP-cone        | 1   | 6.70E-05    |
| ATP-grasp_2     | 3   | 0.000201086 |
| ATP-gua_Ptrans  | 4   | 0.000268114 |
| ATP-gua_PtransN | 4   | 0.000268114 |
| ATP-synt_ab_C   | 7   | 0.0004692   |
| Aurora-A_bind   | 1   | 6.70E-05    |
| Autophagy_N     | 1   | 6.70E-05    |
| AXH             | 2   | 0.000134057 |

**Table S12: Correlation coefficient matrix for ChiPPI with respect to IDDI, iPfam, DOMINE**

|       |        |      |        |        |
|-------|--------|------|--------|--------|
| iPfam | DOMINE | IDDI | ChiPPI |        |
|       |        |      | 1      | ChiPPI |
|       |        | 1    | 0.57   | IDDI   |
|       | 1      | 0.42 | 0.56   | DOMINE |
| 1     | 0.35   | 0.38 | 0.64   | iPfam  |







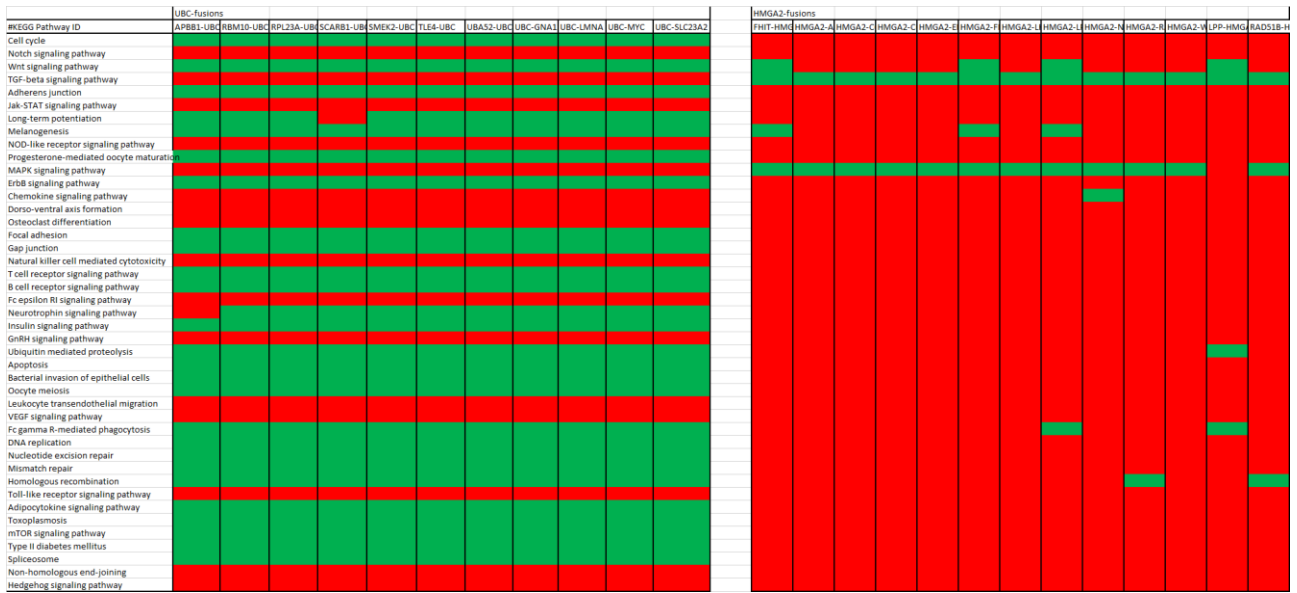

**Figure S8: Enrichment results for UBC-fusions, HMGA2-fusions**

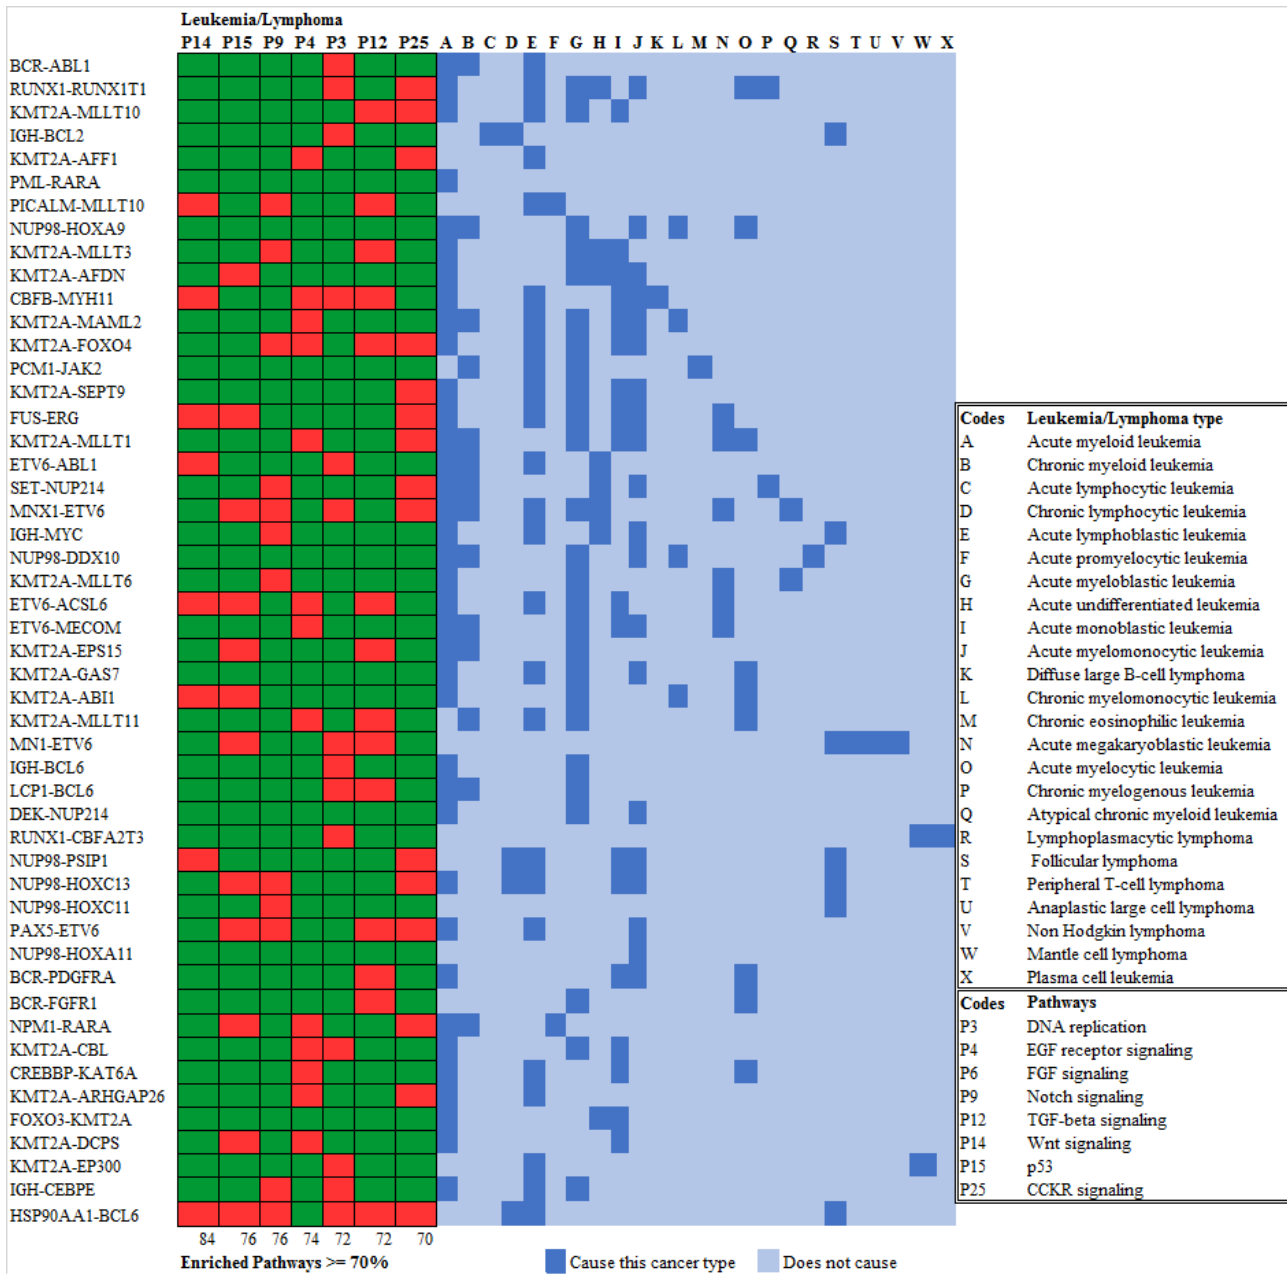

**Figure S9:** The enrichment result for fusion transcripts from different leukemia and lymphoma types.
